# Supplementary material for: Transcriptome Sequencing and Comparison of Venom Glands Revealed Intraspecific Differentiation and Expression Characteristics of Toxin and Defensin Genes in Mesobuthus martensii Populations
Source: MDPI journal article supplement (doi:10.3390/toxins14090630), 2022-09-11
Supplement: s1 [file s1]

### Supplementary Information S3

S3.1 The multiple sequence alignment of four putative new toxin genes (MMA12627 (BmKNaTx62), MMA29116 (BmKNaTx63), MMA34629 (BmKNaTx64) and MMA38588 (BmKNaTx65)), two predicted defensin genes (MMA09285 (BmKDfsin7) and MMA39355 (BmKDfsin8)) and their homologous genes

S3.2 The protein evidences of expressed toxin genes

S3.3 The peptide sequences with serial numbers in S3.2 from MS/MS identification of the *M. martensii* venom samples separated by 2-DE, SDS-PAGE and RP-HPLCa (the original data was from Xu et al. (2014)) [21]

S3.1 The multiple sequence alignment of four putative new toxin genes (MMA12627 (BmKNaTx62), MMA29116 (BmKNaTx63), MMA34629 (BmKNaTx64) and MMA38588 (BmKNaTx65)), two predicted defensin genes (MMA09285 (BmKDfsin7) and MMA39355 (BmKDfsin8)) and their homologous genes

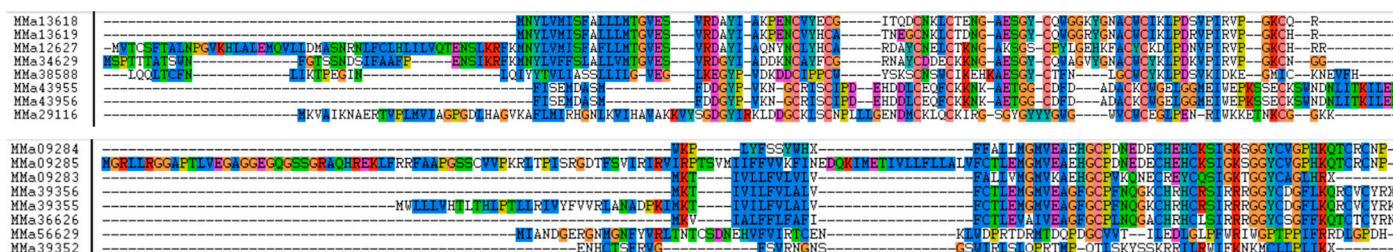

S3.2 The protein evidences of expressed toxin genes

Twenty-one expressed genes with the MS/MS identification evidences of the *M. martensii* venom samples separated by 2-DE, SDS-PAGE and RP-HPLCa by Xu et al. (2014) [21]. Five genes with yellow shadow have the inconclusive evidences due to the inconsistency of an amino acid residue between the multiple alignment sequences of putative toxin genes and the peptide sequences from Xu et al. (2014) [21]

Name Gene ID

BmKNaTx3 MMA13619

|      |                         |
|------|-------------------------|
| 389  | -----LCTENGAESGYQ-WGG-X |
| 416  | -----LCTENGAESGYQ-WGG-X |
| 2852 | -----LCTENGAESGYQ-WGG-X |
| 2623 | -----LCTENGAESGYQ-WGG-X |
| 2247 | -----LCTENGAESGYQ-WGG-X |
| 2230 | -----LCTENGAESGYQ-WGG-X |
| 2144 | -----LCTENGAESGYQ-WGG-X |
| 2104 | -----LCTENGAESGYQ-WGG-X |
| 426  | -----LCTENGAESGYQ-WGG-X |

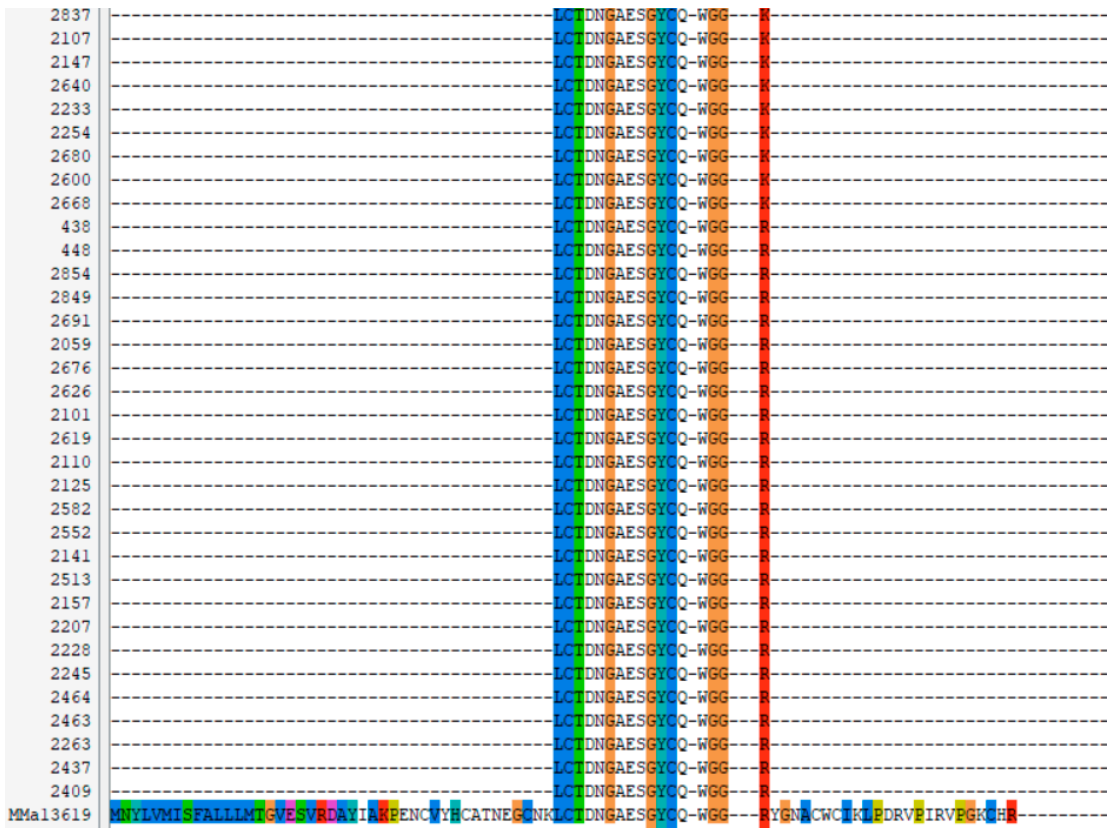

BmKNaTx2 MMa13616

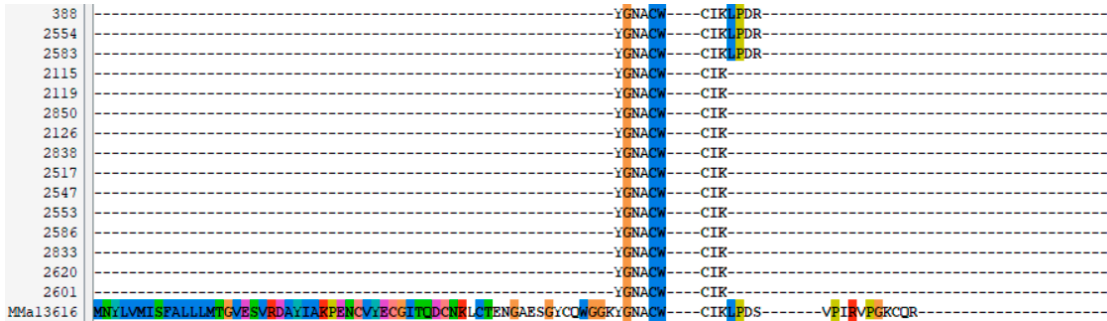

BmKNaTx4 MMa17865

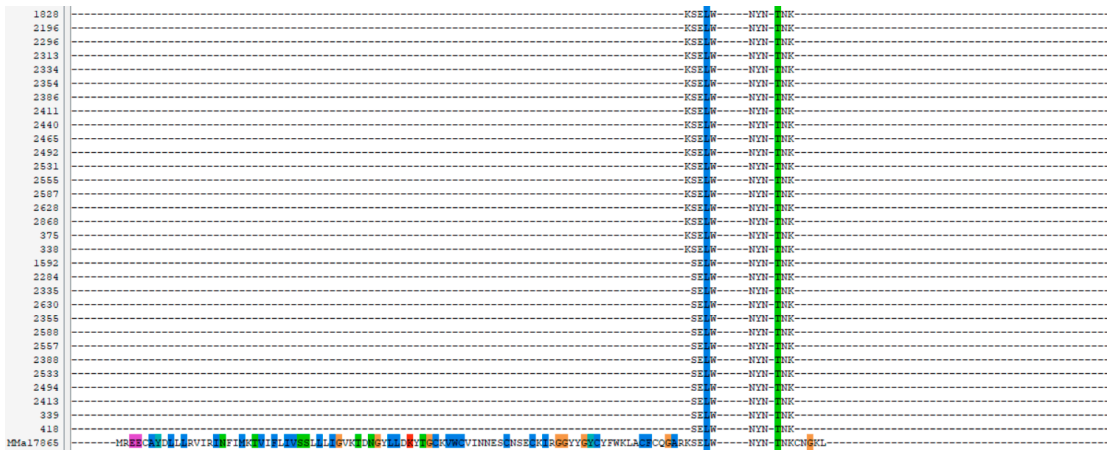

BmKNaTx5      MMa17864

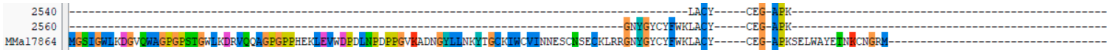

BmKNaTx6      MMa17854

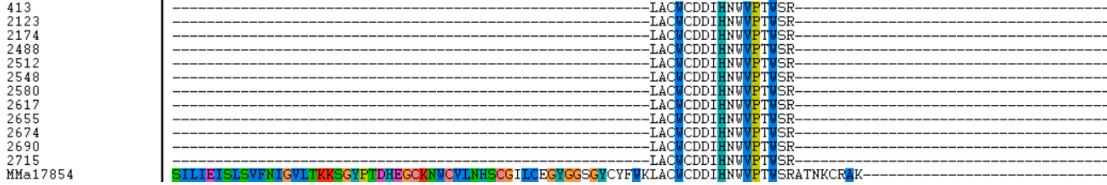

BmKNaTx7      MMa17853

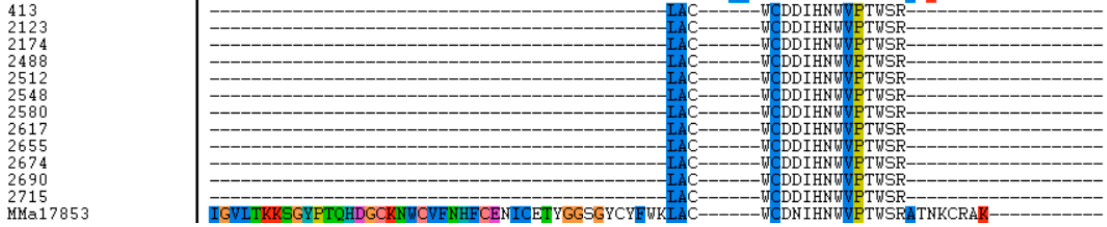

BmKNaTx8      MMa17863

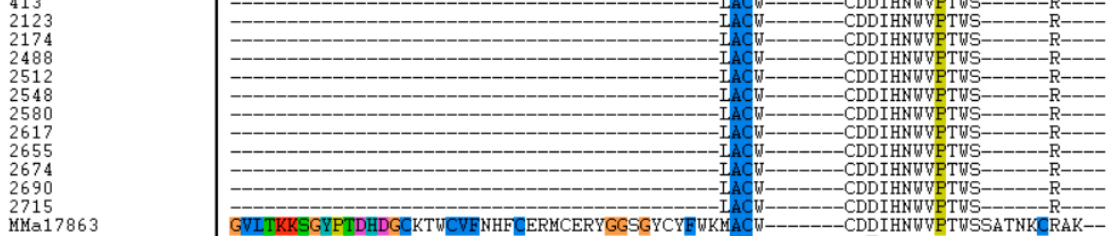

BmKNaTx11      MMa29117

|          |                    |      |       |                                                    |
|----------|--------------------|------|-------|----------------------------------------------------|
| 363      |                    | VSCL | WGNEG | CNK                                                |
| 2127     | GSNGCKV            | VSCL | WGNEG | CNK                                                |
| 370      |                    | VSCL | WGNEG | CNK                                                |
| 439      |                    | VSCL | WGNEG | CNK                                                |
| 414      |                    | VSCL | WGNEG | CNK                                                |
| 2009     |                    | VSCL | WGNEG | CNK                                                |
| 2677     |                    | VSCL | WGNEG | CNK                                                |
| 2022     |                    | VSCL | WGNEG | CNK                                                |
| 2664     |                    | VSCL | WGNEG | CNK                                                |
| 2035     |                    | VSCL | WGNEG | CNK                                                |
| 2031     |                    | VSCL | WGNEG | CNK                                                |
| 2054     |                    | VSCL | WGNEG | CNK                                                |
| 2102     |                    | VSCL | WGNEG | CNK                                                |
| 2111     |                    | VSCL | WGNEG | CNK                                                |
| 2865     |                    | VSCL | WGNEG | CNK                                                |
| 2514     |                    | VSCL | WGNEG | CNK                                                |
| 2621     |                    | VSCL | WGNEG | CNK                                                |
| 2128     |                    | VSCL | WGNEG | CNK                                                |
| 2142     |                    | VSCL | WGNEG | CNK                                                |
| 2158     |                    | VSCL | WGNEG | CNK                                                |
| 2584     |                    | VSCL | WGNEG | CNK                                                |
| 2160     |                    | VSCL | WGNEG | CNK                                                |
| 2489     |                    | VSCL | WGNEG | CNK                                                |
| 2175     |                    | VSCL | WGNEG | CNK                                                |
| 2438     |                    | VSCL | WGNEG | CNK                                                |
| 2352     |                    | VSCL | WGNEG | CNK                                                |
| 2178     |                    | VSCL | WGNEG | CNK                                                |
| 2277     |                    | VSCL | WGNEG | CNK                                                |
| 2264     |                    | VSCL | WGNEG | CNK                                                |
| 2234     |                    | VSCL | WGNEG | CNK                                                |
| 2184     |                    | VSCL | WGNEG | CNK                                                |
| 2220     |                    | VSCL | WGNEG | CNK                                                |
| 2192     |                    | VSCL | WGNEG | CNK                                                |
| 2213     |                    | VSCL | WGNEG | CNK                                                |
| 2208     |                    | VSCL | WGNEG | CNK                                                |
| 335      |                    | VSCL | WGNEG | CNKECR                                             |
| 613      |                    | VSCL | WGNEG | CNKECR                                             |
| 364      |                    | VSCL | WGNEG | CNKECR                                             |
| 499      |                    | VSCL | WGNEG | CNKECR                                             |
| 440      |                    | VSCL | WGNEG | CNKECR                                             |
| 415      |                    | VSCL | WGNEG | CNKECR                                             |
| 371      |                    | VSCL | WGNEG | CNKECR                                             |
| 684      |                    | VSCL | WGNEG | CNKECR                                             |
| 1595     |                    | VSCL | WGNEG | CNKECR                                             |
| 2665     |                    | VSCL | WGNEG | CNKECR                                             |
| 2010     |                    | VSCL | WGNEG | CNKECR                                             |
| 2682     |                    | VSCL | WGNEG | CNKECR                                             |
| 2678     |                    | VSCL | WGNEG | CNKECR                                             |
| 2032     |                    | VSCL | WGNEG | CNKECR                                             |
| 2622     |                    | VSCL | WGNEG | CNKECR                                             |
| 2585     |                    | VSCL | WGNEG | CNKECR                                             |
| 2036     |                    | VSCL | WGNEG | CNKECR                                             |
| 2525     |                    | VSCL | WGNEG | CNKECR                                             |
| 2515     |                    | VSCL | WGNEG | CNKECR                                             |
| 2055     |                    | VSCL | WGNEG | CNKECR                                             |
| 2096     |                    | VSCL | WGNEG | CNKECR                                             |
| 2490     |                    | VSCL | WGNEG | CNKECR                                             |
| 2274     |                    | VSCL | WGNEG | CNKECR                                             |
| 2265     |                    | VSCL | WGNEG | CNKECR                                             |
| 2235     |                    | VSCL | WGNEG | CNKECR                                             |
| 2221     |                    | VSCL | WGNEG | CNKECR                                             |
| 2103     |                    | VSCL | WGNEG | CNKECR                                             |
| 2112     |                    | VSCL | WGNEG | CNKECR                                             |
| 2129     |                    | VSCL | WGNEG | CNKECR                                             |
| 2214     |                    | VSCL | WGNEG | CNKECR                                             |
| 2143     |                    | VSCL | WGNEG | CNKECR                                             |
| 2211     |                    | VSCL | WGNEG | CNKECR                                             |
| 2159     |                    | VSCL | WGNEG | CNKECR                                             |
| 2161     |                    | VSCL | WGNEG | CNKECR                                             |
| 2209     |                    | VSCL | WGNEG | CNKECR                                             |
| 2176     |                    | VSCL | WGNEG | CNKECR                                             |
| 2193     |                    | VSCL | WGNEG | CNKECR                                             |
| 2179     |                    | VSCL | WGNEG | CNKECR                                             |
| 2189     |                    | VSCL | WGNEG | CNKECR                                             |
| 2185     |                    | VSCL | WGNEG | CNKECR                                             |
| MMa29117 | DGLVNRDGYIRGSNGCKV | VSCL | WGNEG | CNKECR                                             |
|          |                    |      |       | RAYGASYGYCWTWGLACWCEGLPDDKTKRSESTCGGKKLTCLKVLKEYVC |



BmKNaTx15      MMa32661

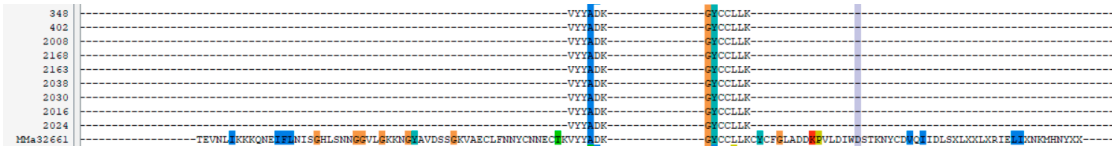

BmKNaTx17      MMa32663

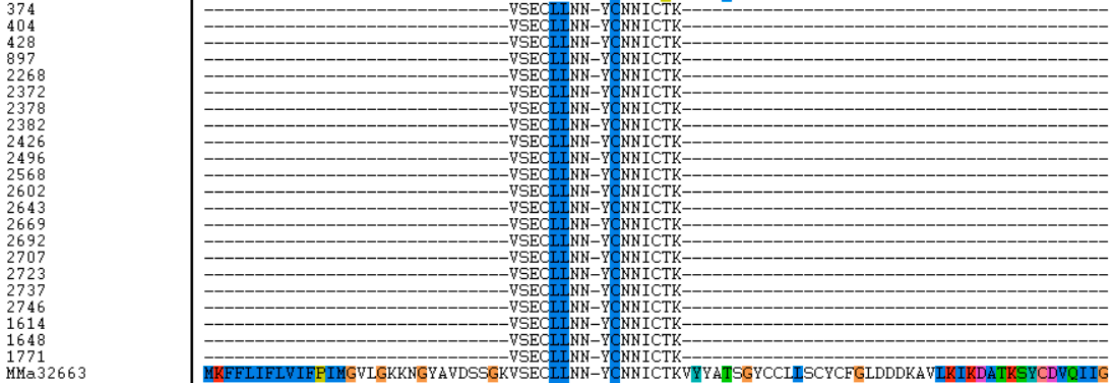

BmKNaTx22      MMa37864

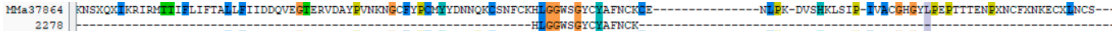

BmKNaTx23      MMa43956

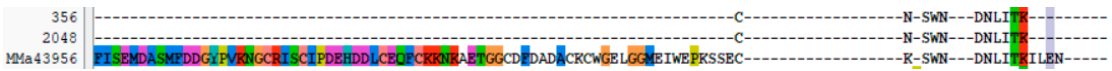

BmKNaTx24      MMa43955

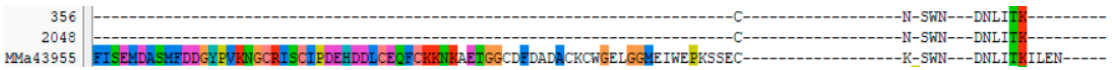

BmKNaTx31      MMa55372

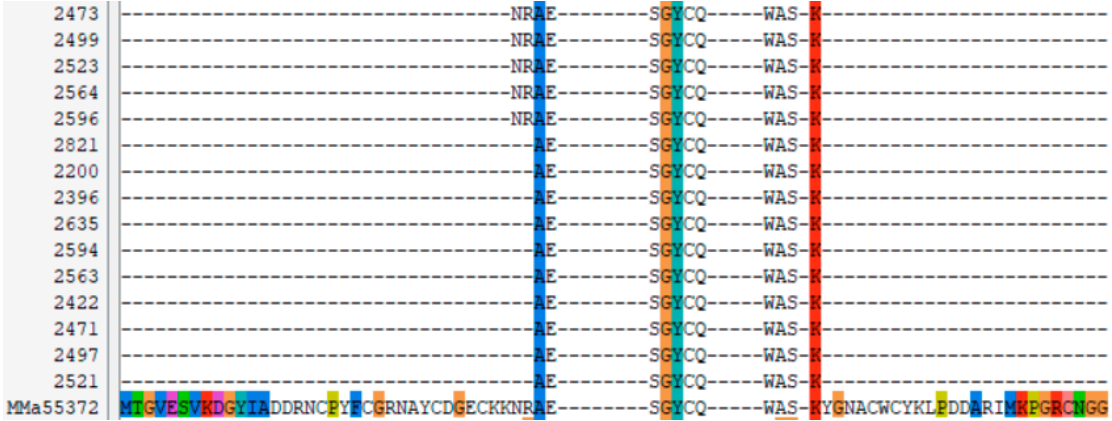

BmKNaTx40      MMa13212

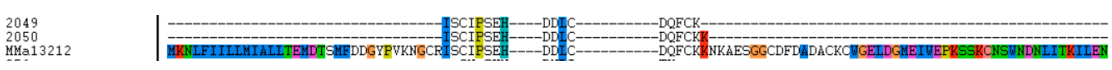

BmKNaTx42      MMa20191

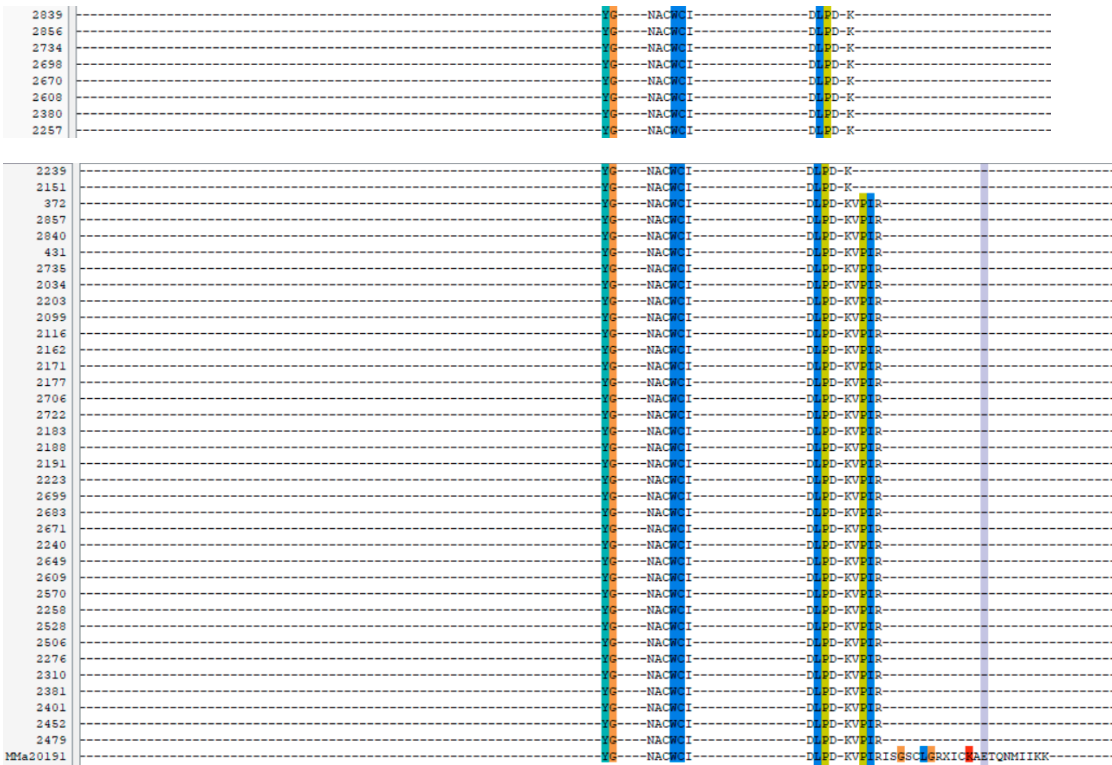

BmKNaTx44      MMa23370

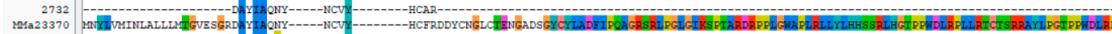

BmKNaTx54      MMa55680

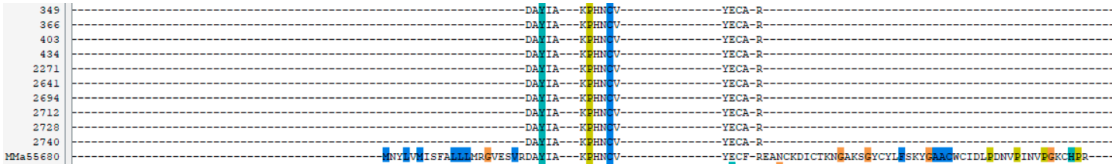

BmKNaTx62      MMa12627

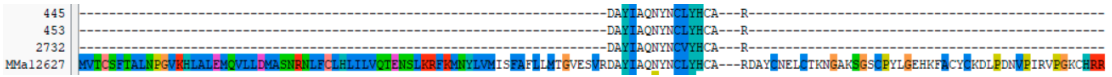

BmKNaTx64      MMa34629

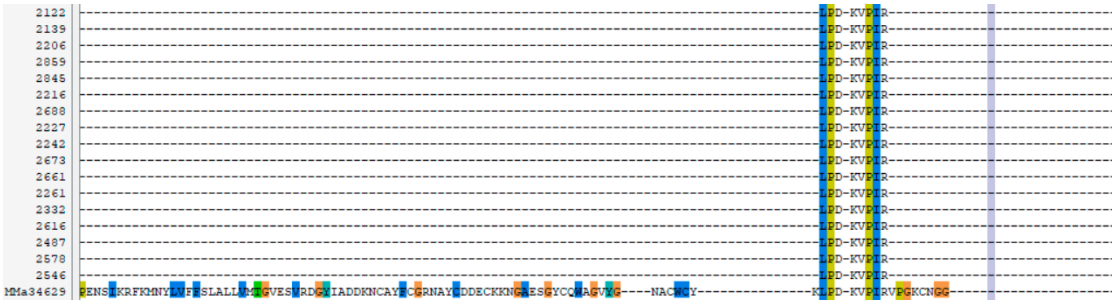

BmKaKTx1MMa16285

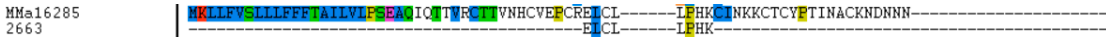

BmKaKTx10 MMa35044

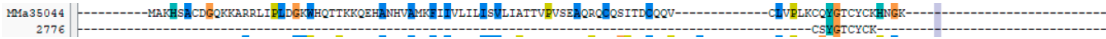

BmKaKTx28 MMa23444

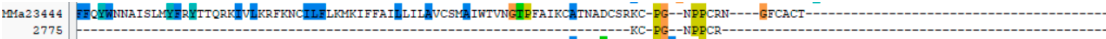

BmKbKTx2 MMa35531

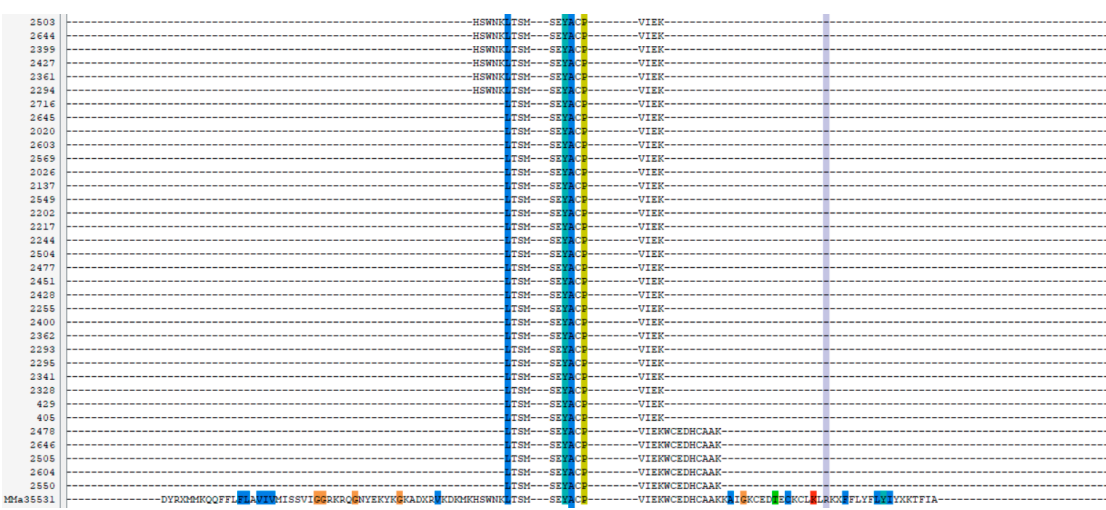

BmKCITx2 MMa44674

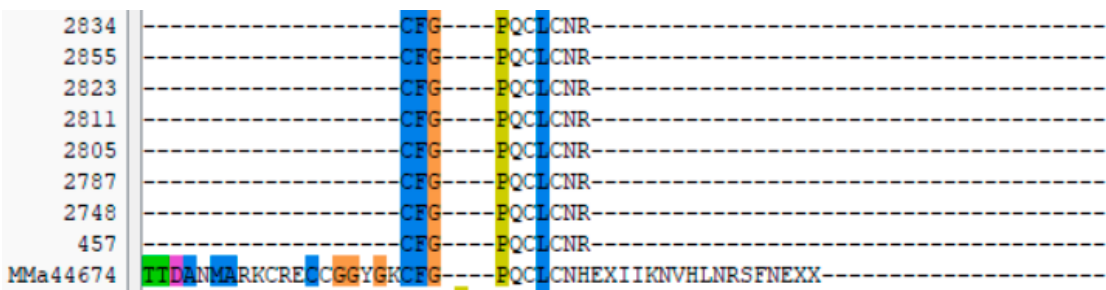

BmKCITx3 MMa00982

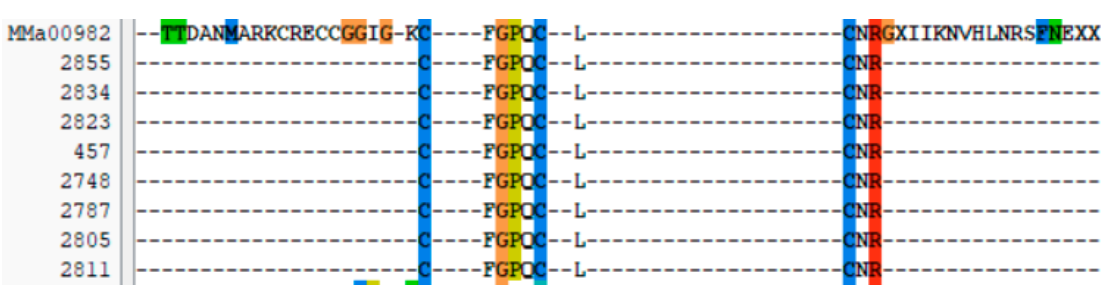

S3.3 The peptide sequences with serial numbers in S3.2 from MS/MS identification of the *M. martensii* venom samples separated by 2-DE, SDS-PAGE and RP-HPLC (the original data was from Xu et al. (2014)) [21]

| Name | Sequence ID           | Peptide sequence       |
|------|-----------------------|------------------------|
| >1   | >MMa46238             | YKNPPYENYNVPPILDNYQK   |
| >2   | >MMa42691             | AMEDGIVYSGK            |
| >3   | >MMa31039             | IISNEELNVIAGDVSPGK     |
| >4   | >comp156_c0_seq1_6    | LFSISEPIKCK            |
| >5   | >comp120_c0_seq1_2    | CIAGPEINCDSEIEGK       |
| >6   | >MMa21615             | GNRFSYDGNVYQDGSR       |
| >7   | >comp214_c0_seq1_6    | AGPSSLVAIR             |
| >8   | >comp214_c0_seq1_6    | NTESTFYAFGR            |
| >9   | >comp188_c0_seq1_3    | SVEDFANSWK             |
| >10  | >comp188_c0_seq1_3    | SVEDFANSWKK            |
| >11  | >comp20_c0_seq1_3     | YAVPEGTLR              |
| >12  | >comp52_c1_seq1_5     | GAPAQYLDVNYVR          |
| >13  | >MMa19079             | YIDVDQNELTR            |
| >14  | >comp197_c0_seq1_4    | TYVKDVIAPVASTVIQNVNR   |
| >15  | >comp11260_c0_seq1_6  | ENKHLVTR               |
| >16  | >comp61_c0_seq1_2     | GIAAEETLKNMAK          |
| >17  | >comp61_c0_seq1_2     | SNEANLAPYIPSQPR        |
| >18  | >comp197_c0_seq1_4    | LSHPNTLIYPYINYILPGTKK  |
| >19  | >comp158487_c0_seq1_6 | QSTDLPFIDSVTACSFIENTPK |
| >20  | >comp627_c0_seq1_2    | ADLSNNLITR             |
| >21  | >comp627_c0_seq1_2    | LVLDDNSIAR             |
| >22  | >comp64616_c0_seq1_1  | FVENNEPQTFFK           |
| >23  | >comp64616_c0_seq1_1  | VAAEQFYEKVEQETSK       |
| >24  | >comp416_c0_seq3_3    | EIAKVAENFYR            |
| >25  | >comp416_c0_seq3_3    | GLCLASAQSGLFHR         |
| >26  | >comp416_c0_seq3_3    | LYKEIMPFYK             |
| >27  | >comp416_c0_seq3_3    | NFFGGILQFQFHK          |
| >28  | >comp83009_c0_seq1_3  | IKIDADGNLGER           |
| >29  | >comp73628_c0_seq1_4  | EICYSPDALAGYCTIHGMK    |
| >30  | >MMa40622             | SHELKLMIPR             |
| >31  | >comp188_c0_seq1_3    | IFNNPTFLNCK            |
| >32  | >comp188_c0_seq1_3    | IYIDAMPTLYNQLK         |
| >33  | >comp188_c0_seq1_3    | LYDRVEMNGLECK          |
| >34  | >comp188_c0_seq1_3    | NLFDCANGGNCR           |
| >35  | >comp188_c0_seq1_3    | SVEDFANSWKK            |
| >36  | >comp188_c0_seq1_3    | VDIPDDITVFWDRNNR       |
| >37  | >comp188_c0_seq1_3    | YSCASSAMESLVR          |
| >38  | >comp93900_c0_seq1_5  | NQEIFGDKIEDIPDYNIER    |
| >39  | >comp1172_c0_seq1_1   | NQIDSIDDSLYGLTK        |



---

|     |                     |                       |
|-----|---------------------|-----------------------|
| >40 | >comp1172_c0_seq1_1 | NQIDSIDDSLYGLTKLR     |
| >41 | >MMa37755           | EAVKNLPHEFVAALR       |
| >42 | >MMa37755           | EGGIISVNNVGLKVLCDTQR  |
| >43 | >MMa37755           | SPVFYFLPHINKEILFNR    |
| >44 | >MMa27598           | ADIITLDGGDVYR         |
| >45 | >MMa27598           | ASSLQQSPSIYLGDFR      |
| >46 | >MMa27598           | SLELSSLHELEGKR        |
| >47 | >comp197_c0_seq1_4  | LSHPNTLIYPYINYILPGTK  |
| >48 | >comp197_c0_seq1_4  | LSHPNTLIYPYINYILPGTKK |
| >49 | >MMa42691           | DASPQYFEFKEYGVR       |
| >50 | >comp1157_c0_seq1_1 | ILATVSNSRDFAK         |
| >51 | >comp1157_c0_seq1_1 | NAVNDMVIR             |
| >52 | >comp1157_c0_seq1_1 | QYDQFYIPELHR          |
| >53 | >comp1157_c0_seq1_1 | VFYDVHPPAR            |
| >54 | >comp627_c0_seq1_2  | ADLSNNLITR            |
| >55 | >MMa52178           | EAILDDAQYVPDPK        |
| >56 | >MMa52178           | NNIVLLANILSK          |
| >57 | >comp544_c0_seq1_5  | LTLVCEDFENINQVHSALR   |
| >58 | >comp544_c0_seq1_5  | SLNVADNQLVEIGEK       |
| >59 | >comp544_c0_seq1_5  | SLNVADNQLVEIGEKIK     |
| >60 | >comp120_c0_seq1_2  | CIAGPEINCDSEIEGKGK    |
| >61 | >comp48_c0_seq1_5   | LSTPVTFTPHVNR         |
| >62 | >MMa55716           | QFHIYSFPGDDALTDDKIR   |
| >63 | >comp214_c0_seq1_6  | AGPSSLVAIR            |
| >64 | >comp214_c0_seq1_6  | ARNTESTFYAFGR         |
| >65 | >comp214_c0_seq1_6  | DIDPKESFLHYER         |
| >66 | >comp214_c0_seq1_6  | DLQNITEEYK            |
| >67 | >comp214_c0_seq1_6  | DLQNITEEYKR           |
| >68 | >comp214_c0_seq1_6  | ELPDTAGSKVIEVDSVELYSK |
| >69 | >comp214_c0_seq1_6  | EYVLNDTGKIFVGSYSVPK   |
| >70 | >comp214_c0_seq1_6  | GSPFFVAIR             |
| >71 | >comp214_c0_seq1_6  | GTLVQLILTNNKEFTKPK    |
| >72 | >comp214_c0_seq1_6  | ISFTNPLDK             |
| >73 | >comp214_c0_seq1_6  | ISFTNPLDKK            |
| >74 | >comp214_c0_seq1_6  | LKPQTEGNTKLVLFNSR     |
| >75 | >comp214_c0_seq1_6  | LSINKYQVGR            |
| >76 | >comp214_c0_seq1_6  | LTDCTISIECPGVTAPYR    |
| >77 | >comp214_c0_seq1_6  | LVLVFNSR              |
| >78 | >comp214_c0_seq1_6  | NTESTFYAFGR           |
| >79 | >comp214_c0_seq1_6  | NYPHTNSENYSISYRR      |
| >80 | >comp214_c0_seq1_6  | RGSPFFVAIR            |
| >81 | >comp214_c0_seq1_6  | STLPVSFLCK            |

---

|      |                    |                             |
|------|--------------------|-----------------------------|
| >82  | >comp214_c0_seq1_6 | TVTNYVSAHDSDETMTIDHFYDK     |
| >83  | >comp214_c0_seq1_6 | VIEVDSVELYSK                |
| >84  | >comp214_c0_seq1_6 | VIEVDSVELYSKQNALEHK         |
| >85  | >comp214_c0_seq1_6 | VTPEEYYDKLVDYSMMK           |
| >86  | >comp20_c0_seq1_3  | YAVPEGTLR                   |
| >87  | >comp52_c1_seq1_5  | GAPAQYLDVNYVR               |
| >88  | >MMa31039          | IISNEELNVIAGDVSPGKGK        |
| >89  | >comp551_c0_seq1_1 | EITGEYPVNAFLPLK             |
| >90  | >comp551_c0_seq1_1 | EITGEYPVNAFLPLKHLR          |
| >91  | >MMa50472          | EAIIDDAQYVPDPK              |
| >92  | >MMa50472          | NNIVLLANILSK                |
| >93  | >comp61_c0_seq1_2  | GIAAEETLKNMAK               |
| >94  | >comp61_c0_seq1_2  | SNEANLAPYIPSQPR             |
| >95  | >MMa47190          | TVNYELTGLTNLR               |
| >96  | >comp197_c0_seq1_4 | LSHPNTLIYPYINYILPGTK        |
| >97  | >comp197_c0_seq1_4 | LSHPNTLIYPYINYILPGTKK       |
| >98  | >comp197_c0_seq1_4 | YLIDPKNPTFK                 |
| >99  | >MMa42691          | AMEDGIVYSGK                 |
| >100 | >MMa42691          | DASPQYFEFKEYGVR             |
| >101 | >MMa42691          | FGPNDASEKPGSFVSFEFSAPGLIFPK |
| >102 | >MMa42691          | VIAGGSVSDSDKETILK           |
| >103 | >comp41_c0_seq1_5  | DANLSLMKDVNNLTYLK           |
| >104 | >MMa31039          | IISNEELNVIAGDVSPGK          |
| >105 | >comp774_c0_seq1_5 | IHSGILPNTLK                 |
| >106 | >comp774_c0_seq1_5 | NVQSLNLAGNQLTEIDESFNCLNK    |
| >107 | >comp774_c0_seq1_5 | TLDLSHNQIHSLGK              |
| >108 | >comp774_c0_seq1_5 | TLNDELTGLR                  |
| >109 | >comp120_c0_seq1_2 | CIAGPEINCDSEIEGKGK          |
| >110 | >comp48_c0_seq1_5  | LSTPVTFTPHVNR               |
| >111 | >comp929_c0_seq1_3 | EASNHPDQQSIVVEAEETGNILDPEYK |
| >112 | >MMa55716          | EFVDLNNEAAR                 |
| >113 | >MMa55716          | LNGFHDAGDFQR                |
| >114 | >MMa55716          | LNYQGLCPPVKR                |
| >115 | >MMa55716          | QFHIYSFPGDDALTDDKIR         |
| >116 | >MMa55716          | TGANPGFHEAIGDVMALSVYTPSHLK  |
| >117 | >MMa30097          | SEIVEQLPNVR                 |
| >118 | >comp548_c0_seq1_1 | VGILAVDNAVYALR              |
| >119 | >MMa53616          | FGFGLLDAEAMVK               |
| >120 | >MMa53616          | GALELYLISPSGSK              |
| >121 | >MMa53616          | SIFITDSQTQLPQPIATGK         |
| >122 | >comp52_c1_seq1_5  | GAPAQYLDVNYVR               |
| >123 | >comp52_c1_seq1_5  | SHSISYGLGCK                 |

---

|      |                     |                          |
|------|---------------------|--------------------------|
| >124 | >comp227_c0_seq1_5  | IINEPTAAAIAYGLDK         |
| >125 | >comp227_c0_seq1_5  | IINEPTAAAIAYGLDKK        |
| >126 | >comp227_c0_seq1_5  | MDKSQIHDIVLVGGSTR        |
| >127 | >comp227_c0_seq1_5  | MKEIAEAYLGK              |
| >128 | >comp227_c0_seq1_5  | QTQTFTTYSDNQPGVLIQVYEGER |
| >129 | >comp227_c0_seq1_5  | TFFPEEISSMVLTK           |
| >130 | >comp227_c0_seq1_5  | TTPSYVAFTDTER            |
| >131 | >comp551_c0_seq1_1  | EITGEYPVNAFLPLKHLR       |
| >132 | >comp551_c0_seq1_1  | LLFLYENQLNSLGNLSLIHLK    |
| >133 | >comp551_c0_seq1_1  | SLNGELTGLINLQELNVK       |
| >134 | >MMa49673           | ALGDGSYTCPSYFLTR         |
| >135 | >MMa39946           | LRDPEETFTVFPVDSAFK       |
| >136 | >MMa36925           | TAADERPIVVNLEATGNVLDPEYK |
| >137 | >MMa43767           | DASSSSVTISHVPTVEELKQGK   |
| >138 | >comp61_c0_seq1_2   | FSDNTAGIAFPNTVCR         |
| >139 | >comp61_c0_seq1_2   | GIAAEETLKNMAK            |
| >140 | >comp61_c0_seq1_2   | SNEANLAPYIPSQPR          |
| >141 | >comp544_c0_seq1_5  | LTLVCEDFENINQVHSALR      |
| >142 | >comp544_c0_seq1_5  | SLNVADNQLVEIGEK          |
| >143 | >comp1072_c0_seq1_4 | ITELKDSLQELR             |
| >144 | >comp1072_c0_seq1_4 | LGISSNLFNKLDVGK          |
| >145 | >comp1072_c0_seq1_4 | LIELAEISR                |
| >146 | >comp1072_c0_seq1_4 | TLTNELTGLK               |
| >147 | >comp1072_c0_seq3_6 | LYLPLHDLPTIFANQGNCLR     |
| >148 | >comp61_c0_seq1_2   | FSDNTAGIAFPNTVCR         |
| >149 | >comp61_c0_seq1_2   | GIAAEETLKNMAK            |
| >150 | >comp61_c0_seq1_2   | SNEANLAPYIPSQPR          |
| >151 | >MMa31039           | IISNEELNVIAGDVSPGK       |
| >152 | >MMa31039           | IISNEELNVIAGDVSPGKGK     |
| >153 | >comp52_c1_seq1_5   | GANVAGSNSNNQFEVQLDR      |
| >154 | >comp52_c1_seq1_5   | GAPAQYLDVNYVR            |
| >155 | >comp52_c1_seq1_5   | SHSISYLGGLCK             |
| >156 | >comp52_c1_seq1_5   | TVTLNGGETTTLK            |
| >157 | >comp52_c1_seq1_5   | VGCGYVSFEK               |
| >158 | >comp52_c1_seq1_5   | VLGERGPDMDGDFSR          |
| >159 | >MMa35583           | LIELAEISR                |
| >160 | >comp4077_c0_seq1_2 | NNQIETLDNSLYNLQELK       |
| >161 | >comp4077_c0_seq1_2 | NNQIETLDNSLYNLQELKR      |
| >162 | >comp4077_c0_seq1_2 | TLTNELTDLKNLK            |
| >163 | >comp48_c0_seq1_5   | IGNIDSDSGQEYTFQSFSK      |
| >164 | >comp48_c0_seq1_5   | LSTPVTFTPHVNR            |
| >165 | >comp48_c0_seq1_5   | NSGIDGVCEGDSGGPLVVR      |

---

|      |                     |                                |
|------|---------------------|--------------------------------|
| >166 | >comp48_c0_seq1_5   | NSGIDGVCEGDSGGPLVVR            |
| >167 | >comp431_c0_seq1_5  | LFYLYGADPVGISVAPNDKNTK         |
| >168 | >comp431_c0_seq1_5  | STFKDSYNQIFDEFGGFPLVK          |
| >169 | >comp41_c0_seq1_5   | DANLSLMKDVNNLTYLK              |
| >170 | >comp1072_c0_seq4_6 | NFEDINQVQNALR                  |
| >171 | >comp197_c0_seq1_4  | AKHPDWSPAQIEK                  |
| >172 | >comp197_c0_seq1_4  | DVIAPVASTVIQNVNR               |
| >173 | >comp197_c0_seq1_4  | GRGNCVWPEEPYTSWK               |
| >174 | >comp197_c0_seq1_4  | ILVNQEETFNGDK                  |
| >175 | >comp197_c0_seq1_4  | LSHPNTLIYPYINYILPGTK           |
| >176 | >comp197_c0_seq1_4  | LSHPNTLIYPYINYILPGTKK          |
| >177 | >comp197_c0_seq1_4  | NDIQEANDKLSWLWK                |
| >178 | >comp197_c0_seq1_4  | QSTALCPSIYMQESHITK             |
| >179 | >comp197_c0_seq1_4  | TYVKDVAPVASTVIQNVNR            |
| >180 | >comp197_c0_seq1_4  | VAIEEWENSAK                    |
| >181 | >comp197_c0_seq1_4  | VAIEEWENSAKEWMLK               |
| >182 | >comp197_c0_seq1_4  | YLIDPKNPTFK                    |
| >183 | >comp197_c0_seq1_4  | YPHIESHGDINGGMLQVSDLANHLK      |
| >184 | >MMa42689           | FGPNDASEKPGSFVSFEFSAPGLIFPGGSK |
| >185 | >MMa42689           | LLAGGSVSDSDKQTILK              |
| >186 | >MMa42689           | NGICAYLIGR                     |
| >187 | >MMa42689           | TSIISSSWHTIGILMK               |
| >188 | >MMa42689           | VLYTCNYGPAGNIK                 |
| >189 | >MMa42691           | AMEDGIVYSGK                    |
| >190 | >MMa42691           | AMEDGIVYSGKYK                  |
| >191 | >MMa42691           | APSTDDYLLYCQFSDKDSK            |
| >192 | >MMa42691           | DASPQYFEFKEYGVR                |
| >193 | >MMa42691           | FGPNDASEKPGSFVSFEFSAPGLIFPK    |
| >194 | >MMa42691           | IGCGVAGYTEANTK                 |
| >195 | >MMa42691           | NGICAYLIGR                     |
| >196 | >MMa42691           | TSSSWNTIGILMK                  |
| >197 | >MMa42691           | VIAGGSVSDSDKETILK              |
| >198 | >MMa31039           | IISNEELNVIAGDVSPGK             |
| >199 | >MMa31039           | IISNEELNVIAGDVSPGKGK           |
| >200 | >MMa31039           | AMEDGIVYSGK                    |
| >201 | >MMa31039           | AMEDGIVYSGKYK                  |
| >202 | >MMa31039           | APSTDDYLLYCQFSDKDSK            |
| >203 | >MMa31039           | DASPQYFEFKEYGVR                |
| >204 | >MMa31039           | FGPNDASEKPGSFVSFEFSAPGLIFPK    |
| >205 | >MMa31039           | IGCGVAGYTEANTK                 |
| >206 | >MMa31039           | NGICAYLIGR                     |
| >207 | >MMa31039           | TSSSWNTIGILMK                  |

---

|      |                     |                              |
|------|---------------------|------------------------------|
| >208 | >MMa31039           | VIAGGSVSDSDKETILK            |
| >209 | >MMa15302           | SYELPDGQVITIGNER             |
| >210 | >comp41_c0_seq1_5   | DANLSLMKDVNNLTYLK            |
| >211 | >MMa42689           | LLAGGSVSDSDKQTILK            |
| >212 | >MMa42689           | NGICAYLIGR                   |
| >213 | >MMa42689           | TSIISSSWHTIGILMK             |
| >214 | >MMa42689           | VLYTCNYGPAGNIK               |
| >215 | >comp48_c0_seq1_5   | IGNIDSDSGQEYTFQSFSK          |
| >216 | >comp48_c0_seq1_5   | LSTPVTFTPHVNR                |
| >217 | >comp48_c0_seq1_5   | NSGIDGVCEGDSGGPLVVR          |
| >218 | >comp48_c0_seq1_5   | NSGIDGVCEGDSGGPLVVR          |
| >219 | >comp545_c0_seq1_1  | AGVHLLGTNGAIPAHK             |
| >220 | >comp545_c0_seq1_1  | IEQPVTLHPFAFR                |
| >221 | >comp1072_c0_seq1_4 | LIELAEISR                    |
| >222 | >comp1072_c0_seq1_4 | TLTNELTGLK                   |
| >223 | >comp4077_c0_seq1_2 | NNQIETLDNSLYNLQELK           |
| >224 | >comp544_c0_seq1_5  | GITEDLPINALVPLKNLR           |
| >225 | >comp544_c0_seq1_5  | SLNVADNQLVEIGEK              |
| >226 | >comp1072_c0_seq3_6 | LYLPLHDLPTIFANQGNCLR         |
| >227 | >comp52_c1_seq1_5   | DEQQTILELHNK                 |
| >228 | >comp52_c1_seq1_5   | DPTGKLPPAGDMLEMEWDEELSK      |
| >229 | >comp52_c1_seq1_5   | EGVSKDEQQTILELHNK            |
| >230 | >comp52_c1_seq1_5   | FTPESINPFIDDDATGHFTQMAWSSTWK |
| >231 | >comp52_c1_seq1_5   | GANVAGSNSNNQFEVQLDR          |
| >232 | >comp52_c1_seq1_5   | GAPAQYLDVNYVR                |
| >233 | >comp52_c1_seq1_5   | KSHSISYLGGLCK                |
| >234 | >comp52_c1_seq1_5   | LADQCVFKHDCDECR              |
| >235 | >comp52_c1_seq1_5   | LPPAGDMLEMEWDEELSKVAQK       |
| >236 | >comp52_c1_seq1_5   | SHSISYLGGLCK                 |
| >237 | >comp52_c1_seq1_5   | TVTLNGGETTTLK                |
| >238 | >comp52_c1_seq1_5   | VGCGYVSFEK                   |
| >239 | >comp52_c1_seq1_5   | VLGERGPDMDEGDFSR             |
| >240 | >comp1072_c0_seq4_6 | NFEDINQVQNALR                |
| >241 | >comp197_c0_seq1_4  | DVIAPVASTVIQNVNR             |
| >242 | >comp197_c0_seq1_4  | ILVNQEETFNGDK                |
| >243 | >comp197_c0_seq1_4  | LSHPNTLIYPYINYILPGTKK        |
| >244 | >comp197_c0_seq1_4  | TYVKDVIAPVASTVIQNVNR         |
| >245 | >comp197_c0_seq1_4  | VAIEEWENSAK                  |
| >246 | >comp197_c0_seq1_4  | VAIEEWENSAKEWMLK             |
| >247 | >comp197_c0_seq1_4  | YLIDPKNPTFK                  |
| >248 | >comp431_c0_seq1_5  | LFYLYGADPVGISVAPNDKNTK       |
| >249 | >comp61_c0_seq1_2   | FSDNTAGIAFPNTVCR             |



---

|      |                     |                                  |
|------|---------------------|----------------------------------|
| >250 | >comp61_c0_seq1_2   | GIAAEETLKNMAK                    |
| >251 | >comp61_c0_seq1_2   | SNEANLAPYIPSQPR                  |
| >252 | >MMa41877           | LVAISLEGNR                       |
| >253 | >MMa23413           | TKYTPQQIAEATVTALQR               |
| >254 | >MMa31039           | IISNEELNVIAGDVSPGK               |
| >255 | >MMa31039           | IISNEELNVIAGDVSPGK GK            |
| >256 | >MMa50337           | FSDNTAGIAFPNTVCR                 |
| >257 | >MMa50337           | GIAAEETLKNMAK                    |
| >258 | >MMa50337           | NSGDSMEVYLANLMNAVK               |
| >259 | >MMa50337           | SNEANLAPYIPSQPR                  |
| >260 | >MMa50337           | STDILVLR                         |
| >261 | >MMa42691           | AMEDGIVYSGK                      |
| >262 | >MMa42691           | AMEDGIVYSGKYK                    |
| >263 | >MMa42691           | APSTDDYLLYCQFSDKDSK              |
| >264 | >MMa42691           | DASPQYFEFKEYGVR                  |
| >265 | >MMa42691           | FQHKN GICAYLIGR                  |
| >266 | >MMa42691           | IGCGVAGYTEANTK                   |
| >267 | >MMa42691           | NGICAYLIGR                       |
| >268 | >MMa42691           | TSSSWNTIGILMK                    |
| >269 | >MMa42691           | VIAGGSVSDSDKETILK                |
|      | >MMa42691           | VLYTCNYGPAGNMIGSEAYQVGSPCSACPENT |
| >270 |                     | K                                |
| >271 | >MMa42689           | FGPNDASEKPGSFVSFEFSAPGLIFPGGSK   |
| >272 | >MMa42689           | FQHKN GICAYLIGR                  |
| >273 | >MMa42689           | NGICAYLIGR                       |
| >274 | >MMa42689           | VLYTCNYGPAGNIK                   |
| >275 | >comp48_c0_seq1_5   | IGNIDSDSGQEYTFQSFSK              |
| >276 | >comp48_c0_seq1_5   | LSTPVTFTPHVNR                    |
| >277 | >comp48_c0_seq1_5   | NSGIDGVCEGDSGGPLVVR              |
| >278 | >comp48_c0_seq1_5   | NSGIDGVCEGDSGGPLVVR              |
| >279 | >comp48_c0_seq1_5   | YANPGEFPWMVFIK                   |
| >280 | >comp545_c0_seq1_1  | AGVHLLGTNGAIPAHK                 |
| >281 | >comp545_c0_seq1_1  | DAPPLELPKGVGFK                   |
| >282 | >comp545_c0_seq1_1  | ESYLCTSFK                        |
| >283 | >comp545_c0_seq1_1  | FINGGTDNSGIVLTLLPGDDQSVTKR       |
| >284 | >comp545_c0_seq1_1  | FNMLMPDVQPLQK                    |
| >285 | >comp545_c0_seq1_1  | GSGINYLV LQVHYADVTK              |
| >286 | >comp545_c0_seq1_1  | HDPLEPQMFYPVENQDLTIEKGDILAAR     |
| >287 | >comp545_c0_seq1_1  | IEQPVTLHPFAFR                    |
| >288 | >comp1072_c0_seq3_6 | LYLPLHDL PDTIFANQGNCLR           |
| >289 | >comp52_c1_seq1_5   | EGVSKDEQQTILELHNK                |
| >290 | >comp52_c1_seq1_5   | GANVAGSNSNNQFEVQLDR              |

---

|      |                      |                           |
|------|----------------------|---------------------------|
| >291 | >comp52_c1_seq1_5    | GAPAQYLDVNYVR             |
| >292 | >comp52_c1_seq1_5    | SHSISYLGGLCK              |
| >293 | >comp52_c1_seq1_5    | TVTLNGGETTTLK             |
| >294 | >comp1072_c0_seq4_6  | NFEDINQVQNALR             |
| >295 | >MMa15302            | SYELPDGQVITIGNER          |
| >296 | >comp197_c0_seq1_4   | LSHPNTLIYPYINYILPGTK      |
| >297 | >comp197_c0_seq1_4   | TYVKDVIAPVASTVIQNVNR      |
| >298 | >comp197_c0_seq1_4   | VAIEEWENSAKEWMLK          |
| >299 | >comp544_c0_seq1_5   | GITEDLPINALVPLKNLR        |
| >300 | >comp544_c0_seq1_5   | LTLVCEDFENINQVHSALR       |
| >301 | >comp61_c0_seq1_2    | FSDNTAGIAFPNTVCR          |
| >302 | >comp61_c0_seq1_2    | GIAAEETLKNMAK             |
| >303 | >comp61_c0_seq1_2    | NSGDSMEVYLANLMNAVK        |
| >304 | >comp61_c0_seq1_2    | SNEANLAPYIPSQPR           |
| >305 | >comp61_c0_seq1_2    | STDILVLR                  |
| >306 | >MMa28760            | YSFTYALVRK                |
| >307 | >MMa33253            | YDPSVQPQMLAR              |
| >308 | >MMa50337            | GIAAEETLKNMAK             |
| >309 | >MMa50337            | SNEANLAPYIPSQPR           |
| >310 | >MMa17864            | SELWAYETNK                |
| >311 | >MMa08776            | ISVSGLGPLNSTVK            |
| >312 | >MMa08776            | ISVSGLGPLNSTVKK           |
| >313 | >MMa08776            | QSNSFMDAVLQNVKTEGR        |
| >314 | >comp661_c0_seq1_2   | FILVADDSQANER             |
| >315 | >comp1468_c0_seq1_6  | ISVEEEINWPHK              |
| >316 | >MMa31039            | FVLTAAHCVYDDER            |
| >317 | >MMa31039            | FVLTAAHCVYDDERR           |
| >318 | >MMa31039            | IISNEELNVIAGDVSPGKGK      |
| >319 | >MMa31039            | KFVLTAAHCVYDDER           |
| >320 | >MMa31039            | KIISNEELNVIAGDVSPGK       |
| >321 | >MMa31039            | TKPAMFTDIR                |
| >322 | >MMa31039            | YLPVSEIYTYNGYNGNWVNDIAILK |
| >323 | >MMa08812            | CADPGYPGVYTR              |
| >324 | >comp78389_c0_seq1_6 | APLYLEIENK                |
| >325 | >comp52_c1_seq1_5    | GANVAGSNSNNQFEVQLDR       |
| >326 | >comp52_c1_seq1_5    | GAPAQYLDVNYVR             |
| >327 | >comp52_c1_seq1_5    | KGANVAGSNSNNQFEVQLDR      |
| >328 | >comp52_c1_seq1_5    | SHSISYLGGLCK              |
| >329 | >comp52_c1_seq1_5    | TVTLNGGETTTLK             |
| >330 | >comp20_c0_seq1_3    | YAVPEGTLR                 |
| >331 | >comp10941_c0_seq2_2 | KYLQFYFR                  |
| >332 | >comp61_c0_seq1_2    | GIAAEETLKNMAK             |

---

|      |                      |                      |
|------|----------------------|----------------------|
| >333 | >comp61_c0_seq1_2    | SNEANLAPYIPSQPR      |
| >334 | >comp16_c0_seq1_5    | LHGVTYGYCYNSR        |
| >335 | >MMa02192            | VSCLWGNEGCNKECR      |
| >336 | >comp20_c0_seq1_3    | YAVPEGTLR            |
| >337 | >MMa13616            | LPDSVPIRVPGK         |
| >338 | >MMa17865            | KSELWNYNTNK          |
| >339 | >MMa17865            | SELWNYNTNK           |
| >340 | >MMa17865            | VWCVINNESCNSECK      |
| >341 | >MMa17864            | IWCVINNESCNSECK      |
| >342 | >MMa17864            | IWCVINNESCNSECKLR    |
| >343 | >MMa17864            | SELWAYETNK           |
| >344 | >MMa17864            | SELWAYETNKCNGR       |
| >345 | >MMa55372            | YGNACWCYK            |
| >346 | >MMa55372            | YGNACWCYKLPDDAR      |
| >347 | >MMa04555            | VAECLFNNYCNNECTK     |
| >348 | >MMa04555            | VYYADKGYCCLLK        |
| >349 | >comp7_c0_seq5_6     | DAYIAKPHNCVYECAR     |
| >350 | >comp82847_c0_seq1_1 | YGNFGINVSTK          |
| >351 | >comp20_c0_seq1_3    | TIIQTAVHK            |
| >352 | >comp20_c0_seq1_3    | TIIQTAVHKLK          |
| >353 | >comp20_c0_seq1_3    | TQFGCPAYQGYCDDHCQDIK |
| >354 | >comp37980_c0_seq1_1 | PTYSILNFITLK         |
| >355 | >comp21_c0_seq1_5    | LHLASGGSCQQPAPFVK    |
| >356 | >comp53_c0_seq1_4    | CNSWNDNLITK          |
| >357 | >comp8602_c1_seq2_6  | IGVYLLNK             |
| >358 | >MMa34629            | DGYIADDKNCAIFCGR     |
| >359 | >comp16_c0_seq1_5    | LEDKDVTIWNAVK        |
| >360 | >comp16_c0_seq1_5    | LHGVTYGYCYNSR        |
| >361 | >comp16_c0_seq1_5    | YYCTILGENEYCRK       |
| >362 | >MMa56510            | QILEPYFPHCCPSSPK     |
| >363 | >MMa02192            | VSCLWGNEGCNK         |
| >364 | >MMa02192            | VSCLWGNEGCNKECR      |
| >365 | >comp21_c0_seq1_5    | LHLASGGSCQQPAPFVK    |
| >366 | >comp7_c0_seq5_6     | DAYIAKPHNCVYECAR     |
| >367 | >comp16_c0_seq1_5    | LEDKDVTIWNAVK        |
| >368 | >comp16_c0_seq1_5    | LHGVTYGYCYNSR        |
| >369 | >comp16_c0_seq1_5    | YYCTILGENEYCR        |
| >370 | >MMa02192            | VSCLWGNEGCNK         |
| >371 | >MMa02192            | VSCLWGNEGCNKECR      |
| >372 | >MMa20191            | YGNACWCIDLDPKVPIR    |
| >373 | >MMa04555            | VAECLFNNYCNNECTK     |
| >374 | >comp38_c0_seq1_5    | VSECLLNNYCNNICTK     |

---

|      |                    |                      |
|------|--------------------|----------------------|
| >375 | >MMa17865          | KSELWNYNTNK          |
| >376 | >MMa17865          | VWCVINNESCNSECK      |
| >377 | >MMa17865          | VWCVINNESCNSECKIR    |
| >378 | >MMa17864          | GNYGYCYFWK           |
| >379 | >MMa17864          | IWCVINNESCNSECK      |
| >380 | >MMa17864          | IWCVINNESCNSECKLR    |
| >381 | >MMa17864          | LACYCEGAPKSELWAYETNK |
| >382 | >MMa17864          | RGNYGYCYFWK          |
| >383 | >MMa17864          | SELWAYETNKCNGR       |
| >384 | >MMa34629          | DGYIADDRNCYPFCGR     |
| >385 | >MMa13616          | LPDSVPIRVPKG         |
| >386 | >MMa55372          | DGYIADDRNCYPFCGR     |
| >387 | >MMa55372          | YGNACWCYKLPDDAR      |
| >388 | >MMa13619          | YGNACWCIKLPDR        |
| >389 | >MMa13616          | LCTENGAESGYCQWGGK    |
| >390 | >MMa13616          | LPDSVPIR             |
| >391 | >MMa13616          | LPDSVPIRVPKG         |
| >392 | >MMa17865          | VWCVINNESCNSECK      |
| >393 | >MMa17865          | VWCVINNESCNSECKIR    |
| >394 | >MMa17864          | IWCVINNESCNSECK      |
| >395 | >MMa17864          | IWCVINNESCNSECKLR    |
| >396 | >MMa17864          | LACYCEGAPKSELWAYETNK |
| >397 | >MMa17864          | SELWAYETNK           |
| >398 | >MMa17864          | SELWAYETNKCNGR       |
| >399 | >MMa55372          | DGYIADDRNCYPFCGR     |
| >400 | >MMa55372          | YGNACWCYK            |
| >401 | >MMa55372          | YGNACWCYKLPDDAR      |
| >402 | >MMa04555          | VYYADKGYCCLLK        |
| >403 | >comp7_c0_seq5_6   | DAYIAKPHNCVYECAR     |
| >404 | >comp38_c0_seq1_5  | VSECLLNNYCNNICTK     |
| >405 | >MMa35530          | LTSMSEYACPVIEK       |
| >406 | >comp20_c0_seq1_3  | YAVPEGTLR            |
| >407 | >comp16_c0_seq1_5  | LEDKDVTIWNNAVK       |
| >408 | >comp16_c0_seq1_5  | LHGVTYGYCYNSR        |
| >409 | >comp16_c0_seq1_5  | YYCTILGENEYCR        |
| >410 | >comp404_c0_seq1_2 | NNFLNIENCCK          |
| >411 | >comp404_c0_seq1_2 | TCESFIYGGVGGNK       |
| >412 | >MMa34629          | DGYIADDRNCYPFCGR     |
| >413 | >comp34_c2_seq1_2  | LACWCDDIHNWVPTWSR    |
| >414 | >MMa02192          | VSCLWGNEGCKNK        |
| >415 | >MMa02192          | VSCLWGNEGCKNKECR     |
| >416 | >MMa13616          | LCTENGAESGYCQWGGK    |

---

|      |                      |                    |
|------|----------------------|--------------------|
| >417 | >MMa13616            | LPDSVPIRVPGK       |
| >418 | >MMa17865            | SELWNYNTNK         |
| >419 | >MMa17865            | VWCVINNESCNSECK    |
| >420 | >MMa17864            | IWCVINNESCNSECK    |
| >421 | >MMa17864            | SELWAYETNKCNGR     |
| >422 | >MMa04118            | CFASSECWTACK       |
| >423 | >MMa04118            | CFASSECWTACKK      |
| >424 | >MMa55372            | DGYIADDRNCPYFCGR   |
| >425 | >MMa55372            | YGNACWCYKLPDDAR    |
| >426 | >comp7_c0_seq4_4     | LCTDNGAESGYCQWGGK  |
| >427 | >comp7833_c0_seq7_2  | RLTNNLDNEYFLDMDYVR |
| >428 | >comp38_c0_seq1_5    | VSECLLNNYCNNICTK   |
| >429 | >MMa35530            | LTSMSEYACPVIEK     |
| >430 | >comp141_c0_seq1_4   | KGFLLGFCQDR        |
| >431 | >MMa20191            | YGNACWCIDLDPKVPIR  |
| >432 | >comp20_c0_seq1_3    | YAVPEGTLR          |
| >433 | >MMa12627            | DLPDNVPIRVPGK      |
| >434 | >comp7_c0_seq5_6     | DAYIAKPHNCVYECAR   |
| >435 | >comp404_c0_seq1_2   | TCESFIYGGVGGNK     |
| >436 | >MMa34629            | DGYIADDKNCAYFCGR   |
| >437 | >comp16_c0_seq1_5    | YYCTILGENEYCR      |
| >438 | >MMa13619            | LCTDNGAESGYCQWGGR  |
| >439 | >MMa02192            | VSCLWGNEGCKNK      |
| >440 | >MMa02192            | VSCLWGNEGCKNKECR   |
| >441 | >MMa13616            | LPDSVPIR           |
| >442 | >MMa13616            | LPDSVPIRVPGK       |
| >443 | >comp968_c0_seq1_1   | VTGNYDLYSR         |
| >444 | >comp20_c0_seq1_3    | YAVPEGTLR          |
| >445 | >MMa12627            | DAYIAQNYNCLYHCAR   |
| >446 | >MMa12627            | DLPDNVPIR          |
| >447 | >MMa12627            | DLPDNVPIRVPGK      |
| >448 | >MMa13619            | LCTDNGAESGYCQWGGR  |
| >449 | >MMa04118            | CFASSECWTACK       |
| >450 | >MMa04118            | CFASSECWTACKK      |
| >451 | >comp58416_c0_seq1_5 | SHPIGPHIWGSSVMK    |
| >452 | >comp20_c0_seq1_3    | YAVPEGTLR          |
| >453 | >MMa12627            | DAYIAQNYNCLYHCAR   |
| >454 | >MMa12627            | DLPDNVPIR          |
| >455 | >MMa12627            | DLPDNVPIRVPGK      |
| >456 | >comp88829_c0_seq1_4 | MIMDVSTTFIPGKK     |
| >457 | >MMa00982            | CFGQPCLCNR         |
| >458 | >comp605_c0_seq1_3   | IGCAGIQYQGSR       |



---

|      |                      |                             |
|------|----------------------|-----------------------------|
| >459 | >comp605_c0_seq1_3   | KDPYSEGEVIAVR               |
| >460 | >comp10743_c0_seq1_4 | FLNIEEQQESCHFR              |
| >461 | >comp10743_c0_seq1_4 | LIEIVGSFVCLNK               |
| >462 | >comp188_c0_seq1_3   | CICSTLAEFLR                 |
| >463 | >comp188_c0_seq1_3   | CNELVDNLVWDNR               |
| >464 | >comp188_c0_seq1_3   | CPEQSEPEFLPEK               |
| >465 | >comp188_c0_seq1_3   | CTVDGWYCPLK                 |
| >466 | >comp188_c0_seq1_3   | DKTITSGVCATWGQFNRYR         |
| >467 | >comp188_c0_seq1_3   | EQTCIDWCRCPEGK              |
| >468 | >comp188_c0_seq1_3   | ETILLTVEPFLR                |
| >469 | >comp188_c0_seq1_3   | FAISWKDPTVECR               |
| >470 | >comp188_c0_seq1_3   | GLCGILNGDYRDDLSR            |
| >471 | >comp188_c0_seq1_3   | GRVIPWTESIPLCAPECYLK        |
| >472 | >comp188_c0_seq1_3   | GWEESVEVPR                  |
| >473 | >comp188_c0_seq1_3   | HEYCACETENEKCICSTLAEFLR     |
| >474 | >comp188_c0_seq1_3   | IDIDLSHISDIIQLK             |
| >475 | >comp188_c0_seq1_3   | IDIDLSHISDIIQLKDK           |
| >476 | >comp188_c0_seq1_3   | IFNNPTFLNCK                 |
| >477 | >comp188_c0_seq1_3   | IFVVIDNK                    |
| >478 | >comp188_c0_seq1_3   | IFVVIDNKEFVVSK              |
| >479 | >comp188_c0_seq1_3   | IYIDAMPTLYNQLK              |
| >480 | >comp188_c0_seq1_3   | KIFVVIDNK                   |
| >481 | >comp188_c0_seq1_3   | KMDEFEEECNAESLSNHVCQYK      |
| >482 | >comp188_c0_seq1_3   | LG GTVSGDWR                 |
| >483 | >comp188_c0_seq1_3   | LYDRVEMNGLECK               |
| >484 | >comp188_c0_seq1_3   | MDEFEEECNAESLSNHVCQYK       |
| >485 | >comp188_c0_seq1_3   | SAPMCHPFNSPIGTQILK          |
| >486 | >comp188_c0_seq1_3   | SAPMCHPFNSPIGTQILKNDK       |
| >487 | >comp188_c0_seq1_3   | SCPMTCQGSQYLCR              |
| >488 | >comp188_c0_seq1_3   | SSGQCVLQEECNCTYFGEVYAAGSLRK |
| >489 | >comp188_c0_seq1_3   | SVEDFANSWK                  |
| >490 | >comp188_c0_seq1_3   | SVEDFANSWKK                 |
| >491 | >comp188_c0_seq1_3   | TITSGVCATWGQFNRYR           |
| >492 | >comp188_c0_seq1_3   | VDIPDDITVFWDR               |
| >493 | >comp188_c0_seq1_3   | VDIPDDITVFWDRNNR            |
| >494 | >comp188_c0_seq1_3   | VIPWTESIPLCAPECYLK          |
| >495 | >comp188_c0_seq1_3   | VKCNELVDNLVWDNR             |
| >496 | >comp188_c0_seq1_3   | WDGKETILLTVEPFLR            |
| >497 | >comp188_c0_seq1_3   | YEFMGSCSYL VFHK             |
| >498 | >comp188_c0_seq1_3   | YSCASSAMESLVR               |
| >499 | >MMa02192            | VSCLWGNCGNKECR              |
| >500 | >MMa42689            | LLAGGSVSDSDKQTILK           |

---

|      |                       |                        |
|------|-----------------------|------------------------|
| >501 | >comp61_c0_seq1_2     | FSDNTAGIAFPNTVCR       |
| >502 | >comp61_c0_seq1_2     | SNEANLAPYIPSQPR        |
| >503 | >comp268_c0_seq2_2    | AVVLTGFGGLK            |
| >504 | >comp268_c0_seq2_2    | IIPNITLIGTASK          |
| >505 | >comp105006_c0_seq1_4 | LATVISPR               |
| >506 | >comp188_c0_seq1_3    | TITSGVCATWGQFNRYR      |
| >507 | >comp214_c0_seq1_6    | AGPSSLVAIR             |
| >508 | >comp214_c0_seq1_6    | AISAIVNSNDDNGVLIGNWSGK |
| >509 | >comp214_c0_seq1_6    | ARNTESTFYAFGR          |
| >510 | >comp214_c0_seq1_6    | DETADIGWKR             |
| >511 | >comp214_c0_seq1_6    | DIDPKESFLHYER          |
| >512 | >comp214_c0_seq1_6    | DLIKLEFTFGSPNLSK       |
| >513 | >comp214_c0_seq1_6    | DLQNITEEYKR            |
| >514 | >comp214_c0_seq1_6    | ENVEFVLKPK             |
| >515 | >comp214_c0_seq1_6    | ESFLHYER               |
| >516 | >comp214_c0_seq1_6    | EYVLNDTGKIFVGSYSVPK    |
| >517 | >comp214_c0_seq1_6    | GTLVQLILTNNK           |
| >518 | >comp214_c0_seq1_6    | GTLVQLILTNNKEFTKPK     |
| >519 | >comp214_c0_seq1_6    | IFVGSYSVPKGR           |
| >520 | >comp214_c0_seq1_6    | ISFTNPLDK              |
| >521 | >comp214_c0_seq1_6    | ISFTNPLDKK             |
| >522 | >comp214_c0_seq1_6    | IYAIATVK               |
| >523 | >comp214_c0_seq1_6    | IYAIATVKETK            |
| >524 | >comp214_c0_seq1_6    | KLTDCTISIECPGVTAPYR    |
| >525 | >comp214_c0_seq1_6    | LEFTFGSPNLSK           |
| >526 | >comp214_c0_seq1_6    | LKPQTEGNTKLVLVFNSR     |
| >527 | >comp214_c0_seq1_6    | LSINKYQVGR             |
| >528 | >comp214_c0_seq1_6    | LTDCTISIECPGVTAPYR     |
| >529 | >comp214_c0_seq1_6    | LVLVFNSR               |
| >530 | >comp214_c0_seq1_6    | NTESTFYAFGR            |
| >531 | >comp214_c0_seq1_6    | NYPHTNSENYISYR         |
| >532 | >comp214_c0_seq1_6    | RGSPFFVAIR             |
| >533 | >comp214_c0_seq1_6    | STLPVSFLCK             |
| >534 | >comp214_c0_seq1_6    | SVRYGQCWVFAGVTTTICR    |
| >535 | >comp214_c0_seq1_6    | TIWAVLSASSVYYTGILAAK   |
| >536 | >comp214_c0_seq1_6    | VIEVDSVELYSK           |
| >537 | >comp214_c0_seq1_6    | VIEVDSVELYSKQNALEHK    |
| >538 | >comp214_c0_seq1_6    | YGQCWVFAGVTTTICR       |
| >539 | >MMa27598             | ADIITLDGGDVYR          |
| >540 | >MMa27598             | ADLLFKDSTTELK          |
| >541 | >MMa27598             | ASSLQQSPSIYLGDFR       |
| >542 | >MMa27598             | CLIENNGDVAFVK          |

---

|      |                       |                             |
|------|-----------------------|-----------------------------|
| >543 | >MMa27598             | CNDLGKVVLSR                 |
| >544 | >MMa27598             | DALGDDYLNAVEAADPLLCTQEA     |
| >545 | >MMa27598             | DPIVDAELKR                  |
| >546 | >MMa27598             | DSTTELKVLPLHATYR            |
| >547 | >MMa27598             | EGRADIITLDGGDVYR            |
| >548 | >MMa27598             | FCTTSEQGINKCNDLGK           |
| >549 | >MMa27598             | HPSLCSLCGDPK                |
| >550 | >MMa27598             | HTTASEYTNGKSDLWAK           |
| >551 | >MMa27598             | KHPSLCSLCGDPK               |
| >552 | >MMa27598             | LCQQCIGDENGHEHKCSR          |
| >553 | >MMa27598             | MDTSIGCILESTTADCITAVK       |
| >554 | >MMa27598             | MEEEVDLVQCISRPDR            |
| >555 | >MMa27598             | QIFSRYPNIPQIQ               |
| >556 | >MMa27598             | RMDTSIGCILESTTADCITAVK      |
| >557 | >MMa27598             | RNLGGGADLSCSWGVRPSNAFVVSSHK |
| >558 | >MMa27598             | SDIYSGYEGALGCLNDGK          |
| >559 | >MMa27598             | SDIYSGYEGALGCLNDGKGDIATSK   |
| >560 | >MMa27598             | SDLWAKELK                   |
| >561 | >MMa27598             | SLELSSLHELEGK               |
| >562 | >MMa27598             | SLELSSLHELEGKR              |
| >563 | >MMa27598             | SYGNKADLLFK                 |
| >564 | >MMa27598             | TAAVADLFSASCAPGANDAK        |
| >565 | >MMa27598             | TQEEKEEISTLR                |
| >566 | >MMa27598             | VPSHQVMISGSATFDR            |
| >567 | >MMa27598             | VPSHQVMISGSATFDRR           |
| >568 | >MMa27598             | YPSNIPQIQ                   |
| >569 | >MMa27598             | YSGYSGAFR                   |
| >570 | >comp39704_c0_seq1_6  | NTDTKLPMIFASPK              |
| >571 | >MMa15018             | ADSNMQTLADLK                |
| >572 | >MMa15018             | EGNADLITLSGR                |
| >573 | >MMa15018             | LCIGDESGANVCSPK             |
| >574 | >MMa52178             | EAILDDAQYVPDPK              |
| >575 | >MMa52178             | RNNIVLLANILSK               |
| >576 | >comp120_c0_seq1_2    | CIAGPEINCDSEIEGK            |
| >577 | >comp120_c0_seq1_2    | TWTAFCEEENMVPCK             |
| >578 | >comp48_c0_seq1_5     | LSTPVTFTPHVNR               |
| >579 | >comp12251_c0_seq10_5 | ITTSRNTPYNDLASGCGGCVSLNISK  |
| >580 | >comp976_c0_seq1_5    | ELISNASDALDKIR              |
| >581 | >comp976_c0_seq1_5    | FAFQAEVNR                   |
| >582 | >comp976_c0_seq1_5    | GVVDSDDLPLNVSR              |
| >583 | >comp976_c0_seq1_5    | LGIIEDPGNR                  |
| >584 | >comp214_c0_seq1_6    | AGPSSLVAIR                  |

---

|      |                       |                                       |
|------|-----------------------|---------------------------------------|
| >585 | >comp214_c0_seq1_6    | AISAIVNSNDDNGVLIGNWSGK                |
| >586 | >comp214_c0_seq1_6    | DLQNITEEYKR                           |
| >587 | >comp214_c0_seq1_6    | GSPFFVAIR                             |
| >588 | >comp214_c0_seq1_6    | GTLVQLILTNNK                          |
| >589 | >comp214_c0_seq1_6    | GTLVQLILTNNKEFTKPK                    |
| >590 | >comp214_c0_seq1_6    | ISFTNPLDK                             |
| >591 | >comp214_c0_seq1_6    | ISFTNPLDKK                            |
| >592 | >comp214_c0_seq1_6    | KLTDCTISIECPGVTAPYR                   |
| >593 | >comp214_c0_seq1_6    | LTDCTISIECPGVTAPYR                    |
| >594 | >comp214_c0_seq1_6    | LVLVFNSR                              |
| >595 | >comp214_c0_seq1_6    | RGSPFFVAIR                            |
| >596 | >comp214_c0_seq1_6    | STLPVSFLCK                            |
| >597 | >comp214_c0_seq1_6    | VIEVDSVELYSK                          |
| >598 | >comp214_c0_seq1_6    | YGQCWVFAGVTTICR                       |
| >599 | >MMa53616             | FGFGLLDAEAMVK                         |
| >600 | >MMa53616             | GALELYLISPSGSK                        |
| >601 | >MMa53616             | SIFITDSQTQLPQPIATGK                   |
| >602 | >comp105006_c0_seq1_4 | LATVISPR                              |
| >603 | >comp774_c0_seq1_5    | TLNDELTGLR                            |
| >604 | >comp775_c0_seq1_1    | ASSALWAVKLDNDLSGK                     |
| >605 | >comp775_c0_seq1_1    | QYFVSWKEPEEQIGLGR                     |
| >606 | >comp775_c0_seq1_1    | SVELDDVLGGSPVQHR                      |
| >607 | >comp775_c0_seq1_1    | TSENEVCLYR                            |
| >608 | >comp775_c0_seq1_1    | VVQGAEPQHFLR                          |
| >609 | >comp775_c0_seq1_1    | VYTSEQIAASITEPDFNVSALHR               |
| >610 | >MMa50472             | EAIIDDAQYVPDPK                        |
| >611 | >MMa50472             | NLVAYDKVALVAGQHK                      |
| >612 | >MMa50472             | RNNIVLLANILSK                         |
| >613 | >MMa02192             | VSCLWGNEGCNKECR                       |
| >614 | >comp61_c0_seq1_2     | FSDNTAGIAFPNTVCR                      |
| >615 | >comp61_c0_seq1_2     | GIAAEETLKNMAK                         |
| >616 | >comp1024_c0_seq1_4   | IMPLIAVADPGYLIAR                      |
| >617 | >comp1024_c0_seq1_4   | LLETFLDDR                             |
| >618 | >comp1024_c0_seq1_4   | MQEEVKWMPLSGPVAGILPYEGK               |
| >619 | >comp1024_c0_seq1_4   | MVETIDKLVGFLLEK                       |
| >620 | >comp1024_c0_seq1_4   | VLLISFDGFR                            |
| >621 | >comp1024_c0_seq1_4   | WMPLSGPVAGILPYEGK                     |
| >622 | >MMa42691             | IGCGVAGYTEANTK                        |
| >623 | >MMa42691             | TSSSWNTIGILMK                         |
| >624 | >MMa42691             | VIAGGSVSDSDKETILK                     |
| >625 | >MMa42691             | VLYTCNYGPAGNMIGSEAYQVGSPCSACPENT<br>K |

---

|      |                       |                          |
|------|-----------------------|--------------------------|
| >626 | >comp41_c0_seq1_5     | DANLSLMKDVNNLTYLK        |
| >627 | >MMa48694             | IWNSQLLQYAGYR            |
| >628 | >MMa48694             | LTEVIADISER              |
| >629 | >comp545_c0_seq1_1    | ESYLCTSFK                |
| >630 | >comp545_c0_seq1_1    | IEQPVTLHPFAFR            |
| >631 | >comp1072_c0_seq1_4   | ITELKDSLQELR             |
| >632 | >comp1072_c0_seq1_4   | LGISSNLFNK               |
| >633 | >comp1072_c0_seq1_4   | LGISSNLFNKLDVGK          |
| >634 | >comp1072_c0_seq1_4   | LIELAEISR                |
| >635 | >comp1072_c0_seq1_4   | MLTMIYNDLK               |
| >636 | >comp1072_c0_seq2_4   | CPAYTGPCDCVFSR           |
| >637 | >comp52_c1_seq1_5     | DEQQTILELHNK             |
| >638 | >comp52_c1_seq1_5     | DGFCLTSLFRK              |
| >639 | >comp52_c1_seq1_5     | EGVSKDEQQTILELHNK        |
| >640 | >comp52_c1_seq1_5     | GANVAGSNSNNQFEVQLDR      |
| >641 | >comp52_c1_seq1_5     | GAPAQYLDVNYVR            |
| >642 | >comp52_c1_seq1_5     | KGANVAGSNSNNQFEVQLDR     |
| >643 | >comp52_c1_seq1_5     | LADQCVFKHDCDECR          |
| >644 | >comp52_c1_seq1_5     | SHSISYLGGLCK             |
| >645 | >comp52_c1_seq1_5     | TESSSDCQSQVEGANKWQTR     |
| >646 | >comp52_c1_seq1_5     | TVTLNGGETTTLK            |
| >647 | >comp52_c1_seq1_5     | VGCGYVSFEK               |
| >648 | >comp52_c1_seq1_5     | VLGERGPDMDEGDFSR         |
| >649 | >comp52_c1_seq1_5     | YLFNCDFKTESSSDCQSQVEGANK |
| >650 | >comp1072_c0_seq3_6   | LYLPLHDL PDTIFANQGNCLR   |
| >651 | >comp1072_c0_seq4_6   | NFEDINQVQNALR            |
| >652 | >comp1172_c0_seq1_1   | CPANTGPCDCFHVSSR         |
| >653 | >comp1172_c0_seq1_1   | ELSLAYNPLK               |
| >654 | >comp1172_c0_seq1_1   | IPINALISLER              |
| >655 | >comp1172_c0_seq1_1   | LCLYDLTIISGK             |
| >656 | >comp1172_c0_seq1_1   | LDLSYNSFTK               |
| >657 | >comp1172_c0_seq1_1   | MNLNLPLL NIPDSLFSNQK     |
| >658 | >comp1172_c0_seq1_1   | MYKDFEDLSNLK             |
| >659 | >comp1172_c0_seq1_1   | NELSSIAYGLEDLNNLEK       |
| >660 | >comp1172_c0_seq1_1   | NIIQVQQALR               |
| >661 | >comp1172_c0_seq1_1   | NQIDSIDDSLYGLTK          |
| >662 | >comp1172_c0_seq1_1   | NVENIIIGEDNYVINK         |
| >663 | >comp105006_c0_seq1_4 | LATVISPR                 |
| >664 | >comp197_c0_seq1_4    | DVIAPVASTVIQNVNR         |
| >665 | >comp197_c0_seq1_4    | ILVNQEETFNGDK            |
| >666 | >comp197_c0_seq1_4    | LSHPNTLIYPYINYILPGTK     |
| >667 | >comp197_c0_seq1_4    | TYVKDVIAPVASTVIQNVNR     |



---

|      |                       |                          |
|------|-----------------------|--------------------------|
| >668 | >comp197_c0_seq1_4    | VAIEEWENSAK              |
| >669 | >comp3601_c0_seq1_6   | ATNVHLPNDASFVIANSCVEMNK  |
| >670 | >comp431_c0_seq1_5    | DISNYLSIQFIR             |
| >671 | >comp431_c0_seq1_5    | DISNYLSIQFIRK            |
| >672 | >comp431_c0_seq1_5    | EFAEAFNCVK               |
| >673 | >comp431_c0_seq1_5    | IENYYAELEFNSADSALTNYVK   |
| >674 | >comp431_c0_seq1_5    | ILITYPETIAK              |
| >675 | >comp431_c0_seq1_5    | NKIENYYAELEFNSADSALTNYVK |
| >676 | >comp431_c0_seq1_5    | NSFGNLPDHEMWTTTAIR       |
| >677 | >comp431_c0_seq1_5    | QLNLDPNAR                |
| >678 | >comp431_c0_seq1_5    | QNEKDISNYLSIQFIR         |
| >679 | >comp431_c0_seq1_5    | TLTEENDRNSWPK            |
| >680 | >comp431_c0_seq1_5    | VIGALANSKEFAEAFNCVK      |
| >681 | >comp431_c0_seq1_5    | VRNSFGNLPDHEMWTTTAIR     |
| >682 | >comp431_c0_seq1_5    | YRQLNLDPNAR              |
| >683 | >MMa10526             | FANICQENVPVKR            |
| >684 | >MMa02192             | VSCLWGNEGCNKECR          |
| >685 | >comp431_c0_seq1_5    | YRQLNLDPNAR              |
| >686 | >comp52_c1_seq1_5     | LADQCVFKHDCDECR          |
| >687 | >comp4077_c0_seq1_2   | NNQIETLDNSLYNLQELKR      |
| >688 | >MMa35583             | LGISSDLFNKLDVGK          |
| >689 | >MMa35583             | LNSLGNSLSNLEMLK          |
| >690 | >MMa42691             | IGCGVAGYTEANTK           |
| >691 | >comp431_c0_seq1_5    | VIGALANSKEFAEAFNCVK      |
| >692 | >comp431_c0_seq1_5    | YRQLNLDPNAR              |
| >693 | >comp52_c1_seq1_5     | TESSSDCQSQVEGANKWQTR     |
| >694 | >comp6409_c0_seq1_2   | SSTFGPSK                 |
| >695 | >comp4077_c0_seq1_2   | LTTLDISNNR               |
| >696 | >comp268_c0_seq2_2    | HLLYQQGGHEYIR            |
| >697 | >MMa47879             | IGVIKAEAQNIAR            |
| >698 | >comp431_c0_seq1_5    | QLNLDPNAR                |
| >699 | >comp431_c0_seq1_5    | YRQLNLDPNAR              |
| >700 | >comp105006_c0_seq1_4 | LATVISPR                 |
| >701 | >comp52_c1_seq1_5     | LADQCVFKHDCDECR          |
| >702 | >comp431_c0_seq1_5    | ILITYPETIAK              |
| >703 | >comp431_c0_seq1_5    | QLNLDPNAR                |
| >704 | >comp431_c0_seq1_5    | TLTEENDRNSWPK            |
| >705 | >comp431_c0_seq1_5    | YRQLNLDPNAR              |
| >706 | >comp1072_c0_seq1_4   | LIELAEISR                |
| >707 | >comp1072_c0_seq1_4   | TLTNELTGLK               |
| >708 | >comp1201_c0_seq2_1   | YLFNFQMK                 |
| >709 | >comp1172_c0_seq1_1   | CPANTGPCDCFHVSSR         |

---

|      |                       |                                       |
|------|-----------------------|---------------------------------------|
| >710 | >comp1172_c0_seq1_1   | ELSLAYNPLK                            |
| >711 | >comp1172_c0_seq1_1   | IPINALISLER                           |
| >712 | >comp1172_c0_seq1_1   | NIIQVQQALR                            |
| >713 | >MMa48694             | LTEVIADISER                           |
| >714 | >MMa35583             | LIELAEISR                             |
| >715 | >MMa42691             | IGCGVAGYTEANTK                        |
| >716 | >comp105006_c0_seq1_4 | LATVISPR                              |
| >717 | >comp197_c0_seq1_4    | TVPSMDFKR                             |
| >718 | >comp197_c0_seq1_4    | VAIEEWENSAK                           |
| >719 | >comp52_c1_seq1_5     | GAPAQYLDVNYVR                         |
| >720 | >comp52_c1_seq1_5     | SHSISYLG LCK                          |
| >721 | >comp52_c1_seq1_5     | TESSSDCQSQVEGANKWQTR                  |
| >722 | >comp52_c1_seq1_5     | TVTLNGGETTTLK                         |
| >723 | >comp52_c1_seq1_5     | VGCGYVSFEK                            |
| >724 | >comp52_c1_seq1_5     | VGCGYVSFEKR                           |
| >725 | >comp31795_c0_seq1_5  | NIIQVKQIVK                            |
| >726 | >MMa42689             | NGICAYLIGR                            |
| >727 | >MMa42689             | YTEAYQVGSPCSACPENTK                   |
| >728 | >MMa35583             | LIELAEISR                             |
| >729 | >comp1072_c0_seq1_4   | AVISLKFLYNLK                          |
| >730 | >comp1072_c0_seq1_4   | ITELKDSLQELR                          |
| >731 | >comp1072_c0_seq1_4   | LIELAEISR                             |
| >732 | >comp1072_c0_seq1_4   | TLTNELTGLK                            |
| >733 | >comp32566_c0_seq1_5  | EASVLSVK                              |
| >734 | >comp545_c0_seq1_1    | AGVHLLGTNGAIPAHK                      |
| >735 | >comp166733_c0_seq1_5 | EIISIILSR                             |
| >736 | >MMa17865             | VWCVINNESCNSECK                       |
| >737 | >MMa42691             | AMEDGIVYSGK                           |
| >738 | >MMa42691             | APSTDDYLLYCQFSDKDSK                   |
| >739 | >MMa42691             | DASPQYFEFKEYGVR                       |
| >740 | >MMa42691             | FGPNDASEKPGSFVSFEFSAPGLIFPK           |
| >741 | >MMa42691             | IGCGVAGYTEANTK                        |
| >742 | >MMa42691             | IGCGVAGYTEANTKK                       |
| >743 | >MMa42691             | NGICAYLIGR                            |
| >744 | >MMa42691             | TSSSWNTIGILMK                         |
| >745 | >MMa42691             | VIAGGSVSDSDKETILK                     |
| >746 | >MMa42691             | VLYTCNYGPAGNMIGSEAYQVGSPCSACPENT<br>K |
| >747 | >comp105006_c0_seq1_4 | LATVISPR                              |
| >748 | >comp1072_c0_seq3_6   | LYLPLHDLPTIFANQGNCLR                  |
| >749 | >comp197_c0_seq1_4    | AKHPDWSPAQIEK                         |
| >750 | >comp197_c0_seq1_4    | DQPSEYFCK                             |

---

|      |                     |                           |
|------|---------------------|---------------------------|
| >751 | >comp197_c0_seq1_4  | DVIAPVASTVIQNVNR          |
| >752 | >comp197_c0_seq1_4  | GRGNCVWPEEPYTSWK          |
| >753 | >comp197_c0_seq1_4  | HPDWSPAQIEK               |
| >754 | >comp197_c0_seq1_4  | ILVNQEETFNGDK             |
| >755 | >comp197_c0_seq1_4  | LSHPNTLIYPYINYILPGTK      |
| >756 | >comp197_c0_seq1_4  | LSHPNTLIYPYINYILPGTKK     |
| >757 | >comp197_c0_seq1_4  | NDIQEANDKLSWLWK           |
| >758 | >comp197_c0_seq1_4  | QSTALCPSIYMQESHITK        |
| >759 | >comp197_c0_seq1_4  | TVPSMDFK                  |
| >760 | >comp197_c0_seq1_4  | TVPSMDFKR                 |
| >761 | >comp197_c0_seq1_4  | TYVKDVIAPVASTVIQNVNR      |
| >762 | >comp197_c0_seq1_4  | VAIEEWENSAK               |
| >763 | >comp197_c0_seq1_4  | VAIEEWENSAKEWMLK          |
| >764 | >comp197_c0_seq1_4  | VVWEVPSIMCSK              |
| >765 | >comp197_c0_seq1_4  | YLIDPKNPTFK               |
| >766 | >comp197_c0_seq1_4  | YPHIESHGDINGGMLQVSDLANHLK |
| >767 | >comp1072_c0_seq2_4 | CPAYTGPCDCVFSR            |
| >768 | >comp545_c0_seq1_1  | AGVHLLGTNGAIPAHK          |
| >769 | >comp545_c0_seq1_1  | ESYLCTSFK                 |
| >770 | >comp1072_c0_seq1_4 | ITELKDSLQELR              |
| >771 | >comp1072_c0_seq1_4 | LIELAEISR                 |
| >772 | >comp1072_c0_seq1_4 | TLTNELTGLK                |
| >773 | >comp197_c0_seq1_4  | ILVNQEETFNGDK             |
| >774 | >comp197_c0_seq1_4  | VAIEEWENSAK               |
| >775 | >comp197_c0_seq1_4  | YLIDPKNPTFK               |
| >776 | >MMa42689           | CSEEYPGLCK                |
| >777 | >comp52_c1_seq1_5   | SHSISYLGGLCK              |
| >778 | >comp52_c1_seq1_5   | TESSSDCQSQVEGANKWQTR      |
| >779 | >comp52_c1_seq1_5   | TVTLNGGETTTLK             |
| >780 | >comp52_c1_seq1_5   | VGCGYVSFEK                |
| >781 | >MMa42691           | AMEDGIVYSGK               |
| >782 | >MMa42691           | CSEEYPGLCK                |
| >783 | >MMa42691           | EMEVITYTFEVKK             |
| >784 | >MMa42691           | IGCGVAGYTEANTK            |
| >785 | >MMa42691           | KDASPQYFEFK               |
| >786 | >MMa42691           | SDREMEVITYTFEVK           |
| >787 | >MMa42691           | VIAGGSVSDSDKETILK         |
| >788 | >comp1072_c0_seq1_4 | ITELKDSLQELR              |
| >789 | >comp52_c1_seq1_5   | DEQQTILELHNK              |
| >790 | >comp52_c1_seq1_5   | EGVSKDEQQTILELHNK         |
| >791 | >comp52_c1_seq1_5   | GANVAGSNSNNQFEVQLDR       |
| >792 | >comp52_c1_seq1_5   | GAPAQYLDVNYVR             |

---

|      |                     |                                       |
|------|---------------------|---------------------------------------|
| >793 | >comp52_c1_seq1_5   | KGANVAGSNSNNQFEVQLDR                  |
| >794 | >comp52_c1_seq1_5   | LADQCVFKHDCDECR                       |
| >795 | >comp52_c1_seq1_5   | SHSISYLGGLCK                          |
| >796 | >comp52_c1_seq1_5   | TESSSDCQSQVEGANKWQTR                  |
| >797 | >comp52_c1_seq1_5   | TVTLNGGETTTLK                         |
| >798 | >comp52_c1_seq1_5   | VGCGYVSFEK                            |
| >799 | >comp52_c1_seq1_5   | VGCGYVSFEKR                           |
| >800 | >comp52_c1_seq1_5   | VLGERGPDMDDEGDFSR                     |
| >801 | >comp52_c1_seq1_5   | YLFNCDFK                              |
| >802 | >MMa42691           | APSTDDYLLYCQFSDKDSK                   |
| >803 | >MMa42691           | DASPQYFEFKEYGVR                       |
| >804 | >MMa42691           | IGCGVAGYTEANTK                        |
| >805 | >MMa42691           | KDASPQYFEFK                           |
| >806 | >MMa42691           | NGICAYLIGR                            |
| >807 | >MMa42691           | SDREMEVTTYTFEVK                       |
| >808 | >MMa42691           | TSSSWNTIGILMK                         |
| >809 | >MMa42691           | VIAGGSVSDSDKETILK                     |
| >810 | >MMa42691           | VLYTCNYGPAGNMIGSEAYQVGSPCSACPENT<br>K |
| >811 | >comp545_c0_seq1_1  | AGVHLLGTNGAIPAHK                      |
| >812 | >comp1072_c0_seq1_4 | ITELKDSLQELR                          |
| >813 | >comp1072_c0_seq1_4 | LGISSNLFNK                            |
| >814 | >comp1072_c0_seq1_4 | LIELAEISR                             |
| >815 | >comp1072_c0_seq1_4 | MLTMIYNDLK                            |
| >816 | >comp1072_c0_seq1_4 | TLTNELTGLK                            |
| >817 | >MMa31039           | IISNEELNVIAGDVSPGK                    |
| >818 | >comp545_c0_seq1_1  | AGVHLLGTNGAIPAHK                      |
| >819 | >comp545_c0_seq1_1  | ESYLCTSK                              |
| >820 | >comp545_c0_seq1_1  | IEQPVTLHPFAFR                         |
| >821 | >comp52_c1_seq1_5   | DEQQTILELHNK                          |
| >822 | >comp52_c1_seq1_5   | DGFCLTLSFRK                           |
| >823 | >comp52_c1_seq1_5   | EGVSKDEQQTILELHNK                     |
| >824 | >comp52_c1_seq1_5   | ESWTQLYVCNYGPAGNVEDSEMYR              |
| >825 | >comp52_c1_seq1_5   | KGANVAGSNSNNQFEVQLDR                  |
| >826 | >comp52_c1_seq1_5   | GAPAQYLDVNYVR                         |
| >827 | >comp52_c1_seq1_5   | KGANVAGSNSNNQFEVQLDR                  |
| >828 | >comp52_c1_seq1_5   | LADQCVFKHDCDECR                       |
| >829 | >comp52_c1_seq1_5   | LDSEGNEWLPYSIGIPMK                    |
| >830 | >comp52_c1_seq1_5   | LDSEGNEWLPYSIGIPMKQPMQISLK            |
| >831 | >comp52_c1_seq1_5   | LPPAGDMLEMEWDEELSK                    |
| >832 | >comp52_c1_seq1_5   | SHSISYLGGLCK                          |
| >833 | >comp52_c1_seq1_5   | TESSSDCQSQVEGANKWQTR                  |

---

|      |                       |                          |
|------|-----------------------|--------------------------|
| >834 | >comp52_c1_seq1_5     | TVTLNGGETTTLK            |
| >835 | >comp52_c1_seq1_5     | VGCGYVSFEK               |
| >836 | >comp52_c1_seq1_5     | VGCGYVSFEKR              |
| >837 | >comp52_c1_seq1_5     | VLGERGPDMDEGDFSR         |
| >838 | >comp1072_c0_seq4_6   | NFEDINQVQNALR            |
| >839 | >comp197_c0_seq1_4    | DVIAPVASTVIQNVNR         |
| >840 | >comp197_c0_seq1_4    | TYVKDVIAPVASTVIQNVNR     |
| >841 | >MMa42691             | APSTDDYLLYCQFSDK         |
| >842 | >MMa42691             | APSTDDYLLYCQFSDKDSK      |
| >843 | >MMa42691             | DASPQYFEFK               |
| >844 | >MMa42691             | DASPQYFEFKKEYGVR         |
| >845 | >MMa42691             | EMEVITYTFEVKK            |
| >846 | >MMa42691             | IGCGVAGYTEANTK           |
| >847 | >MMa42691             | KDASPQYFEFK              |
| >848 | >MMa42691             | NGICAYLIGR               |
| >849 | >MMa42691             | SDREMEVITYTFEVK          |
| >850 | >MMa42691             | TSSSWNTIGILMK            |
| >851 | >MMa42691             | VIAGGSVSDSDKETILK        |
| >852 | >comp1072_c0_seq1_4   | ITELKDSLQELR             |
| >853 | >comp1072_c0_seq1_4   | LIELAEISR                |
| >854 | >comp1072_c0_seq1_4   | TLTNELTGLK               |
| >855 | >comp61_c0_seq1_2     | SNEANLAPYIPSQPR          |
| >856 | >comp545_c0_seq1_1    | ESYLCTSFK                |
| >857 | >MMa35583             | LGISSDLFNK               |
| >858 | >MMa35583             | LIELAEISR                |
| >859 | >MMa35583             | LNSLGNSLSNLEMLK          |
| >860 | >comp1072_c0_seq4_6   | NFEDINQVQNALR            |
| >861 | >comp48_c0_seq1_5     | NSGIDGVCEGDSGGPLVVR      |
| >862 | >comp4077_c0_seq1_2   | TLTNELTDLK               |
| >863 | >comp105006_c0_seq1_4 | LATVISPR                 |
| >864 | >MMa41877             | LVAISLEGNR               |
| >865 | >comp197_c0_seq1_4    | DVIAPVASTVIQNVNR         |
| >866 | >comp197_c0_seq1_4    | TYVKDVIAPVASTVIQNVNR     |
| >867 | >comp197_c0_seq1_4    | VAIEEWENSAK              |
| >868 | >comp52_c1_seq1_5     | DEQQTILELHNK             |
| >869 | >comp52_c1_seq1_5     | EGVSKDEQQTILELHNK        |
| >870 | >comp52_c1_seq1_5     | ESWTQLYVCNYGPAGNVEDSEMYR |
| >871 | >comp52_c1_seq1_5     | GANVAGSNSNNQFEVQLDR      |
| >872 | >comp52_c1_seq1_5     | GAPAQYLDVNYVR            |
| >873 | >comp52_c1_seq1_5     | GPDMDEGDFSR              |
| >874 | >comp52_c1_seq1_5     | KGANVAGSNSNNQFEVQLDR     |
| >875 | >comp52_c1_seq1_5     | KSHSISYGLGCK             |

---

|      |                       |                                  |
|------|-----------------------|----------------------------------|
| >876 | >comp52_c1_seq1_5     | LADQCVFKHDCDECR                  |
| >877 | >comp52_c1_seq1_5     | LDSEGNEWLPYSIGIPMK               |
| >878 | >comp52_c1_seq1_5     | LPPAGDMLEMEWDEELSK               |
| >879 | >comp52_c1_seq1_5     | SHSISYLG LCK                     |
| >880 | >comp52_c1_seq1_5     | TESSSDCQSQVEGANKWQTR             |
| >881 | >comp52_c1_seq1_5     | TVTLNGGETTTLK                    |
| >882 | >comp52_c1_seq1_5     | VGCGYVSFEK                       |
| >883 | >comp52_c1_seq1_5     | VGCGYVSFEKR                      |
| >884 | >comp52_c1_seq1_5     | VLGERGPDMDEGDFSR                 |
| >885 | >comp52_c1_seq1_5     | YLFNCDFKTESSSDCQSQVEGANK         |
| >886 | >comp166757_c0_seq1_1 | KGHSTEILAMECYK                   |
| >887 | >MMa42691             | AMEDGIVYSGK                      |
| >888 | >MMa42691             | APSTDDYLLYCQFSDK                 |
| >889 | >MMa42691             | APSTDDYLLYCQFSDKDSK              |
| >890 | >MMa42691             | DASPQYFEFKEYGVR                  |
| >891 | >MMa42691             | IGCGVAGYTEANTK                   |
| >892 | >MMa42691             | KDASPQYFEFK                      |
|      | >MMa42691             | KVLYTCNYGPAGNMIGSEAYQVGSPCSACPEN |
| >893 |                       | TK                               |
| >894 | >MMa42691             | TSSSWNTIGILMK                    |
| >895 | >MMa42691             | VIAGGSVSDSDKETILK                |
|      | >MMa42691             | VLYTCNYGPAGNMIGSEAYQVGSPCSACPENT |
| >896 |                       | K                                |
| >897 | >comp38_c0_seq1_5     | VSECLLNNYCNNICTK                 |
| >898 | >MMa05656             | ILGLAYPGTLCNK                    |
| >899 | >MMa17864             | IWCVINNESCNSECK                  |
| >900 | >MMa42689             | FQHKNIGICAYLIGR                  |
| >901 | >MMa42689             | NGICAYLIGR                       |
| >902 | >MMa16313             | QTLSENIADNGGLR                   |
| >903 | >comp48_c0_seq1_5     | IGNIDSDSGQEYTFQSFSK              |
| >904 | >comp545_c0_seq1_1    | AGVHLLGTNGAIPAHK                 |
| >905 | >comp545_c0_seq1_1    | ESYLCTSFK                        |
| >906 | >comp545_c0_seq1_1    | FNMLMPDVQPLQK                    |
| >907 | >comp545_c0_seq1_1    | GSGINYLV LQVHYADVTK              |
| >908 | >comp545_c0_seq1_1    | IEQPVTLHPFAFR                    |
| >909 | >comp1072_c0_seq1_4   | ITELKDSLQELR                     |
| >910 | >comp1072_c0_seq1_4   | LGISSNLFNK                       |
| >911 | >comp1072_c0_seq1_4   | LGISSNLFNKLDVGK                  |
| >912 | >comp1072_c0_seq1_4   | LIELAEISR                        |
| >913 | >comp1072_c0_seq1_4   | TLTNELTGLK                       |
| >914 | >comp1072_c0_seq2_4   | CPAYTGPCDCVFSR                   |
| >915 | >comp52_c1_seq1_5     | DEQQTILELHNK                     |

---

|      |                     |                       |
|------|---------------------|-----------------------|
| >916 | >comp52_c1_seq1_5   | EGVSKDEQQTILELHNK     |
| >917 | >comp52_c1_seq1_5   | GANVAGSNSNNQFEVQLDR   |
| >918 | >comp52_c1_seq1_5   | GAPAQYLDVNYVR         |
| >919 | >comp52_c1_seq1_5   | GPDMDEGDFSR           |
| >920 | >comp52_c1_seq1_5   | KGANVAGSNSNNQFEVQLDR  |
| >921 | >comp52_c1_seq1_5   | LADQCVFKHDCDECR       |
| >922 | >comp52_c1_seq1_5   | SHSISYLG LCK          |
| >923 | >comp52_c1_seq1_5   | TESSSDCQSQVEGANKWQTR  |
| >924 | >comp52_c1_seq1_5   | TVTLNGGETTTLK         |
| >925 | >comp52_c1_seq1_5   | VGCGYVSFEK            |
| >926 | >comp52_c1_seq1_5   | VGCGYVSFEKR           |
| >927 | >comp52_c1_seq1_5   | VLGERGPDMDEGDFSR      |
| >928 | >comp1072_c0_seq3_6 | LYLPLHDLPTIFANQGNCLR  |
| >929 | >MMa34459           | LPPVVFVLGGR           |
| >930 | >MMa34459           | QQTFAEAVTEPGLTFVAAK   |
| >931 | >MMa34459           | YYTEFDYDNAR           |
| >932 | >MMa31039           | IISNEELNVIAGDVSPGK    |
| >933 | >comp1072_c0_seq4_6 | NFEDINQVQNALR         |
| >934 | >comp347_c1_seq1_6  | ILGLAYPGTLCNK         |
| >935 | >comp197_c0_seq1_4  | DVIAPVASTVIQNVNR      |
| >936 | >comp197_c0_seq1_4  | GNCVWPEEPYTSWK        |
| >937 | >comp197_c0_seq1_4  | IVIFYESQLGK           |
| >938 | >comp197_c0_seq1_4  | QSTALCPSIYMQESHITK    |
| >939 | >comp197_c0_seq1_4  | TYVKDVIA PVASTVIQNVNR |
| >940 | >comp197_c0_seq1_4  | VAIEEWENSAK           |
| >941 | >comp197_c0_seq1_4  | VAIEEWENSAKEWMLK      |
| >942 | >MMa42691           | AMEDGIVYSGK           |
| >943 | >MMa42691           | AMEDGIVYSGKYK         |
| >944 | >MMa42691           | APSTDDYLLYCQFSDK      |
| >945 | >MMa42691           | APSTDDYLLYCQFSDKDSK   |
| >946 | >MMa42691           | DASPQYFEFK            |
| >947 | >MMa42691           | DASPQYFEFKKEYGVR      |
| >948 | >MMa42691           | EMEVTYTFEVKK          |
| >949 | >MMa42691           | FQHKN GICAYLIGR       |
| >950 | >MMa42691           | IGCGVAGYTEANTK        |
| >951 | >MMa42691           | KDASPQYFEFK           |
| >952 | >MMa42691           | NGICAYLIGR            |
| >953 | >MMa42691           | SDREMEV TYTFEVK       |
| >954 | >MMa42691           | TSSSWNTIGILMK         |
| >955 | >MMa42691           | VIAGGSVSDSDKETILK     |
| >956 | >comp1072_c0_seq1_4 | ITELKDSLQELR          |
| >957 | >comp1072_c0_seq1_4 | LIELAEISR             |

---

|      |                       |                                      |
|------|-----------------------|--------------------------------------|
| >958 | >comp1072_c0_seq1_4   | TLTNELTGLK                           |
| >959 | >comp4077_c0_seq1_2   | LTTLDISNNR                           |
| >960 | >comp4077_c0_seq1_2   | TLTNELTDLKNLK                        |
| >961 | >comp61_c0_seq1_2     | ADIVMLITK                            |
| >962 | >comp61_c0_seq1_2     | DCPASDGYIMGDR                        |
| >963 | >comp61_c0_seq1_2     | FSDNTAGIAFPNTVCR                     |
| >964 | >comp61_c0_seq1_2     | GIAAEETLKNMAK                        |
| >965 | >comp61_c0_seq1_2     | MLFNTLDLR                            |
| >966 | >comp61_c0_seq1_2     | SNEANLAPYIPSPQR                      |
| >967 | >MMa42689             | APTSDDYLLYCHFSDK                     |
| >968 | >MMa42689             | APTSDDYLLYCHFSDKDSK                  |
| >969 | >MMa42689             | GWYTTEVK                             |
| >970 | >MMa42689             | LLAGGSVSDSDKQTILK                    |
| >971 | >MMa42689             | NGICAYLIGR                           |
| >972 | >MMa42689             | VLYTCNYGPAGNIK                       |
| >973 | >MMa42689             | YTEAYQVGSPCSACPENTK                  |
| >974 | >MMa42691             | AMEDGIVYSGK                          |
| >975 | >MMa42691             | DASPQYFEFKEYGVR                      |
| >976 | >MMa42691             | IGCGVAGYTEANTK                       |
| >977 | >MMa42691             | NGICAYLIGR                           |
| >978 | >MMa42691             | TSSSWNTIGILMK                        |
| >979 | >MMa42691             | VIAGGSVSDSDKETILK                    |
| >980 | >comp431_c0_seq1_5    | LPESNLCMTK                           |
| >981 | >comp105006_c0_seq1_4 | LATVISPR                             |
| >982 | >comp1072_c0_seq4_6   | NFEDINQVQNALR                        |
| >983 | >comp197_c0_seq1_4    | DVIAPVASTVIQNVNR                     |
| >984 | >comp197_c0_seq1_4    | TVPSMDFKR                            |
| >985 | >comp52_c1_seq1_5     | GANVAGSNSNNQFEVQLDR                  |
| >986 | >comp52_c1_seq1_5     | GAPAQYLDVNYVR                        |
| >987 | >comp52_c1_seq1_5     | LADQCVFKHDCDECR                      |
| >988 | >comp52_c1_seq1_5     | SHSISYLGGLCK                         |
| >989 | >comp52_c1_seq1_5     | TESSSDCQSQVEGANKWQTR                 |
| >990 | >comp52_c1_seq1_5     | TVTLNGGETTTLK                        |
| >991 | >comp52_c1_seq1_5     | VGCGYVSFEK                           |
| >992 | >comp52_c1_seq1_5     | YLFNCDFK                             |
| >993 | >comp52_c1_seq1_5     | YLFNCDFKTESSSDCQSQVEGANK             |
| >994 | >MMa42689             | APTSDDYLLYCHFSDK                     |
| >995 | >MMa42689             | APTSDDYLLYCHFSDKDSK                  |
| >996 | >MMa42689             | ETQYQTLPSAANMMQLEWDDLAIAQAHSN<br>QCK |
| >997 | >MMa42689             | FGPNDASEKPGSFVSFEFSAPGLIFPGGSK       |
| >998 | >MMa42689             | IGCGLTGFMDDNTNKVLYTCNYGPAGNIK        |



---

|       |                      |                                 |
|-------|----------------------|---------------------------------|
|       |                      | LATGKETQYQTLPSAANMMQLEWDDELAAlA |
| >999  | >MMa42689            | QAHSNQCK                        |
| >1000 | >MMa42689            | LLAGGSVSDSDKQTILK               |
| >1001 | >MMa42689            | NGICAYLIGR                      |
| >1002 | >MMa42689            | TSIISSSWHTIGILMK                |
| >1003 | >MMa42689            | VLYTCNYGPAGNIK                  |
| >1004 | >MMa42689            | YTEAYQVGSPCSACPENTK             |
| >1005 | >comp1072_c0_seq1_4  | LIELAEISR                       |
| >1006 | >comp1072_c0_seq3_6  | LYLPLHDLPTIFANQGNCLR            |
| >1007 | >comp61_c0_seq1_2    | FSDNTAGIAFPNTVCR                |
| >1008 | >comp61_c0_seq1_2    | MLFNTLDLR                       |
| >1009 | >comp61_c0_seq1_2    | SNEANLAPYIPSQPR                 |
| >1010 | >comp31348_c0_seq1_5 | LLHNNIYKR                       |
| >1011 | >comp197_c0_seq1_4   | DVIAPVASTVIQNVNR                |
| >1012 | >comp197_c0_seq1_4   | GNCVWPEEPYTSWK                  |
| >1013 | >comp197_c0_seq1_4   | LSHPNTLIYPYINYILPGTK            |
| >1014 | >comp197_c0_seq1_4   | TYVKDVIAPVASTVIQNVNR            |
| >1015 | >comp52_c1_seq1_5    | GAPAQYLDVNYVR                   |
| >1016 | >comp52_c1_seq1_5    | VGCGYVSFEK                      |
| >1017 | >MMa42691            | DASPQYFEFKEYGVR                 |
| >1018 | >MMa42691            | IGCGVAGYTEANTK                  |
| >1019 | >MMa42691            | NGICAYLIGR                      |
| >1020 | >MMa42691            | TSSSWNTIGILMK                   |
| >1021 | >MMa42691            | VIAGGSVSDSDKETILK               |
| >1022 | >MMa42689            | APTSDDYLLYCHFSDK                |
| >1023 | >MMa42689            | APTSDDYLLYCHFSDKDSK             |
| >1024 | >MMa42689            | FGPNDASEKPGSFVSFEFSAPGLIFPGGSK  |
| >1025 | >MMa42689            | IGCGLTGFMDDNTNKVLYTCNYGPAGNIK   |
| >1026 | >MMa42689            | LLAGGSVSDSDKQTILK               |
| >1027 | >MMa42689            | NGICAYLIGR                      |
| >1028 | >MMa42689            | TSIISSSWHTIGILMK                |
| >1029 | >MMa42689            | VLYTCNYGPAGNIK                  |
| >1030 | >MMa42689            | YTEAYQVGSPCSACPENTK             |
| >1031 | >comp1072_c0_seq1_4  | LIELAEISR                       |
| >1032 | >comp61_c0_seq1_2    | SNEANLAPYIPSQPR                 |
| >1033 | >MMa35583            | LIELAEISR                       |
| >1034 | >MMa42691            | AMEDGIVYSGK                     |
| >1035 | >MMa42691            | APSTDDYLLYCQFSDKDSK             |
| >1036 | >MMa42691            | DASPQYFEFKEYGVR                 |
| >1037 | >MMa42691            | IGCGVAGYTEANTK                  |
| >1038 | >MMa42691            | NGICAYLIGR                      |
| >1039 | >MMa42691            | TSSSWNTIGILMK                   |

---

|       |                       |                       |
|-------|-----------------------|-----------------------|
| >1040 | >MMa42691             | VIAGGSVSDSDKETILK     |
| >1041 | >comp105006_c0_seq1_4 | LATVISPR              |
| >1042 | >comp1072_c0_seq4_6   | NFEDINQVQNALR         |
| >1043 | >comp52_c1_seq1_5     | GANVAGSNSNNQFEVQLDR   |
| >1044 | >comp52_c1_seq1_5     | GAPAQYLDVNYVR         |
| >1045 | >comp52_c1_seq1_5     | LADQCVFKHDCDECR       |
| >1046 | >comp52_c1_seq1_5     | SHSISYLGGLCK          |
| >1047 | >comp52_c1_seq1_5     | TESSSDCQSQVEGANKWQTR  |
| >1048 | >comp52_c1_seq1_5     | TVTLNGGETTTLK         |
| >1049 | >comp52_c1_seq1_5     | VGCGYVSFEK            |
| >1050 | >MMa42689             | LLAGGSVSDSDKQTILK     |
| >1051 | >MMa42689             | VLYTCNYGPAGNIK        |
| >1052 | >MMa42689             | YTEAYQVGSPCSACPENTK   |
| >1053 | >comp268_c0_seq2_2    | AVVLTGFGGLK           |
| >1054 | >comp268_c0_seq2_2    | AWAELTAVPAK           |
| >1055 | >comp268_c0_seq2_2    | GYGLLKPLGR            |
| >1056 | >comp268_c0_seq2_2    | HLLYQQGGHEYIR         |
| >1057 | >comp268_c0_seq2_2    | IIPNITLIGTASK         |
| >1058 | >comp268_c0_seq2_2    | NTILLHSAGGGVGQAVAQMAK |
| >1059 | >comp268_c0_seq2_2    | TVIDSTWAFEDVPEAMQR    |
| >1060 | >comp268_c0_seq2_2    | YILYGTASIVSGETK       |
| >1061 | >comp169119_c0_seq1_5 | AVTSLVPR              |
| >1062 | >comp41_c0_seq1_5     | DANLSLMK              |
| >1063 | >comp60456_c0_seq1_2  | ASMAVQITK             |
| >1064 | >MMa42689             | GWYTTEVK              |
| >1065 | >MMa42689             | LLAGGSVSDSDKQTILK     |
| >1066 | >MMa42689             | VLYTCNYGPAGNIK        |
| >1067 | >MMa42689             | YTEAYQVGSPCSACPENTK   |
| >1068 | >MMa52966             | MPLTIGETADK           |
| >1069 | >comp1072_c0_seq1_4   | LIELAEISR             |
| >1070 | >MMa35583             | LIELAEISR             |
| >1071 | >comp105006_c0_seq1_4 | LATVISPR              |
| >1072 | >comp268_c0_seq2_2    | AVVLTGFGGLK           |
| >1073 | >comp268_c0_seq2_2    | AWAELTAVPAK           |
| >1074 | >comp268_c0_seq2_2    | HLLYQQGGHEYIR         |
| >1075 | >comp268_c0_seq2_2    | IIPNITLIGTASK         |
| >1076 | >comp268_c0_seq2_2    | ITLDPNMEPKPKPQPTK     |
| >1077 | >comp268_c0_seq2_2    | NTILLHSAGGGVGQAVAQMAK |
| >1078 | >comp268_c0_seq2_2    | SGGLNFLDVMVR          |
| >1079 | >comp268_c0_seq2_2    | SWWQVDKVNPIK          |
| >1080 | >comp268_c0_seq2_2    | TVIDSTWAFEDVPEAMQR    |
| >1081 | >comp268_c0_seq2_2    | VKSGGLNFLDVMVR        |

---

|       |                       |                         |
|-------|-----------------------|-------------------------|
| >1082 | >comp268_c0_seq2_2    | YILYGTASIVSGETK         |
| >1083 | >comp268_c0_seq2_2    | AVVLTGFGGLK             |
| >1084 | >comp268_c0_seq2_2    | AVVLTGFGGLKSVK          |
| >1085 | >comp268_c0_seq2_2    | AWAELTAVPAK             |
| >1086 | >comp268_c0_seq2_2    | EKNTILLHSAGGGVGQAVAQMAK |
| >1087 | >comp268_c0_seq2_2    | GYGLLKPLGR              |
| >1088 | >comp268_c0_seq2_2    | HLLYQQGGHEYIR           |
| >1089 | >comp268_c0_seq2_2    | IIPNITLIGTASK           |
| >1090 | >comp268_c0_seq2_2    | IKTVIDSTWAFEDVPEAMQR    |
| >1091 | >comp268_c0_seq2_2    | ITLDPNMEPKPKPQPTK       |
| >1092 | >comp268_c0_seq2_2    | LFDENKISISGFNLR         |
| >1093 | >comp268_c0_seq2_2    | NTILLHSAGGGVGQAVAQMAK   |
| >1094 | >comp268_c0_seq2_2    | SGGLNFLDVMVR            |
| >1095 | >comp268_c0_seq2_2    | SWWQVDKVNPIK            |
| >1096 | >comp268_c0_seq2_2    | TVIDSTWAFEDVPEAMQR      |
| >1097 | >comp268_c0_seq2_2    | VKSGGLNFLDVMVR          |
| >1098 | >comp268_c0_seq2_2    | VNPIKLFDENK             |
| >1099 | >comp268_c0_seq2_2    | YILYGTASIVSGETK         |
| >1100 | >comp508_c0_seq1_4    | ILTSPPKTDALLYEGAICPEAK  |
| >1101 | >comp544_c0_seq1_5    | SLNVADNQLVEIGEK         |
| >1102 | >comp1166_c0_seq1_4   | GSFSYDGINEFLR           |
| >1103 | >comp1166_c0_seq1_4   | GVVNVGAVDADKHQSLGGQYGVR |
| >1104 | >comp1072_c0_seq1_4   | ITELKDSLQELR            |
| >1105 | >comp4077_c0_seq1_2   | TLTNELTDLKNLK           |
| >1106 | >comp52_c1_seq1_5     | GAPAQYLDVNYVR           |
| >1107 | >comp1072_c0_seq4_6   | NFEDINQVQNALR           |
| >1108 | >comp1172_c0_seq1_1   | IPINALISLER             |
| >1109 | >comp1172_c0_seq1_1   | NQIDSIDDSLYGLTK         |
| >1110 | >comp105006_c0_seq1_4 | LATVISPR                |
| >1111 | >comp105102_c0_seq1_2 | ISRCLFSAAMVLVR          |
| >1112 | >comp197_c0_seq1_4    | TYVKDVIAPVASTVIQNVNR    |
| >1113 | >MMa42689             | LLAGGSVSDSDKQTILK       |
| >1114 | >MMa42689             | VLYTCNYGPAGNIK          |
| >1115 | >comp568_c0_seq1_4    | DALSCQIIPQK             |
| >1116 | >comp568_c0_seq1_4    | DALSCQIIPQKQVGR         |
| >1117 | >comp568_c0_seq1_4    | DIDPNKTTTAQMYEK         |
| >1118 | >comp568_c0_seq1_4    | EALVSNLMGMFEK           |
| >1119 | >comp568_c0_seq1_4    | ECILSGLLSVSGKK          |
| >1120 | >comp568_c0_seq1_4    | FNLPSAQLDEYGR           |
| >1121 | >comp568_c0_seq1_4    | GTGEDFDFSK              |
| >1122 | >comp568_c0_seq1_4    | KSDIYVSLVSYTHQVAAK      |
| >1123 | >comp568_c0_seq1_4    | QVYCDPSYVPDR            |

---

|       |                       |                                        |
|-------|-----------------------|----------------------------------------|
| >1124 | >comp568_c0_seq1_4    | QVYCDPSYVPDRSEK                        |
| >1125 | >comp568_c0_seq1_4    | SDIYVSLVSYTHQVAAK                      |
| >1126 | >comp568_c0_seq1_4    | SPYLYPLYGLGELPQGFAR                    |
| >1127 | >comp568_c0_seq1_4    | YYGGESASITPLEELFSK                     |
| >1128 | >comp61_c0_seq1_2     | FSDNTAGIAFPNTVCR                       |
| >1129 | >comp61_c0_seq1_2     | MLFNTLDLR                              |
| >1130 | >comp61_c0_seq1_2     | SNEANLAPYIPSQPR                        |
| >1131 | >MMa42691             | AMEDGIVYSGK                            |
| >1132 | >MMa42691             | APSTDDYLLYCQFSDK                       |
| >1133 | >MMa42691             | APSTDDYLLYCQFSDKDSK                    |
| >1134 | >MMa42691             | CSEEYPGLCK                             |
| >1135 | >MMa42691             | DASPQYFEFK                             |
| >1136 | >MMa42691             | DASPQYFEFKKEYGVR                       |
| >1137 | >MMa42691             | IGCGVAGYTEANTK                         |
| >1138 | >MMa42691             | IGCGVAGYTEANTKK                        |
| >1139 | >MMa42691             | KVLYTCNYGPAGNMIGSEAYQVGSPCSACPEN<br>TK |
| >1140 | >MMa42691             | NGICAYLIGR                             |
| >1141 | >MMa42691             | TSSSWNTIGILMK                          |
| >1142 | >MMa42691             | VIAGGSVSDSDKETILK                      |
| >1143 | >MMa42691             | VLYTCNYGPAGNMIGSEAYQVGSPCSACPENT<br>K  |
| >1144 | >MMa07107             | GYSFTTTAEREIVR                         |
| >1145 | >MMa07107             | IKIIPPER                               |
| >1146 | >MMa07107             | IWHHTFYNELR                            |
| >1147 | >MMa07107             | LDLAGRDLTDYLMK                         |
| >1148 | >comp122875_c0_seq1_4 | QFPSLVGR                               |
| >1149 | >comp544_c0_seq1_5    | GITEDLPINALVPLK                        |
| >1150 | >comp544_c0_seq1_5    | GITEDLPINALVPLKNLR                     |
| >1151 | >comp544_c0_seq1_5    | ILMLELNHITVLKDPLWK                     |
| >1152 | >comp544_c0_seq1_5    | IYSNVFPPTLK                            |
| >1153 | >comp544_c0_seq1_5    | LHLDILILDDNNIFR                        |
| >1154 | >comp544_c0_seq1_5    | LKILNLSR                               |
| >1155 | >comp544_c0_seq1_5    | LKSLGNSLIHLK                           |
| >1156 | >comp544_c0_seq1_5    | LTLVCEDFENINQVHSALR                    |
| >1157 | >comp544_c0_seq1_5    | SLGNSLIHLKK                            |
| >1158 | >comp544_c0_seq1_5    | SLNVADNQLVEIGEKIK                      |
| >1159 | >comp544_c0_seq1_5    | TLNGELTGLVNLEELYVVQNR                  |
| >1160 | >comp4077_c0_seq1_2   | LTTLDISNNR                             |
| >1161 | >comp4077_c0_seq1_2   | NNQIETLDNSLYNLQELKR                    |
| >1162 | >comp4077_c0_seq1_2   | TLTNELTDLK                             |
| >1163 | >comp4077_c0_seq1_2   | TLTNELTDLKNLK                          |

---

|       |                       |                              |
|-------|-----------------------|------------------------------|
| >1164 | >comp1072_c0_seq1_4   | ITELKDSLQELR                 |
| >1165 | >comp1072_c0_seq1_4   | LIELAEISR                    |
| >1166 | >comp16672_c0_seq10_5 | TLLDLKDK                     |
| >1167 | >comp52_c1_seq1_5     | DEQQTILELHNK                 |
| >1168 | >comp52_c1_seq1_5     | DGFCLTLSFR                   |
| >1169 | >comp52_c1_seq1_5     | EGVSKDEQQTILELHNK            |
| >1170 | >comp52_c1_seq1_5     | FTPESINPFIDDDATGHFTQMAWSSTWK |
| >1171 | >comp52_c1_seq1_5     | GANVAGSNSNNQFEVQLDR          |
| >1172 | >comp52_c1_seq1_5     | GAPAQYLDVNYVR                |
| >1173 | >comp52_c1_seq1_5     | GPDMDEGDFSR                  |
| >1174 | >comp52_c1_seq1_5     | KGANVAGSNSNNQFEVQLDR         |
| >1175 | >comp52_c1_seq1_5     | KSHSISYLG LCK                |
| >1176 | >comp52_c1_seq1_5     | LADQCVFKHDCDECR              |
| >1177 | >comp52_c1_seq1_5     | LDSEGNEWLPYSIGIPMK           |
| >1178 | >comp52_c1_seq1_5     | LPPAGDMLEMEWDEELSK           |
| >1179 | >comp52_c1_seq1_5     | QPMQISLK                     |
| >1180 | >comp52_c1_seq1_5     | SHSISYLG LCK                 |
| >1181 | >comp52_c1_seq1_5     | TESSSDCQSQVEGANKWQTR         |
| >1182 | >comp52_c1_seq1_5     | TVTLNGGETTTLK                |
| >1183 | >comp52_c1_seq1_5     | VGCGYVSFEK                   |
| >1184 | >comp52_c1_seq1_5     | VGCGYVSFEKR                  |
| >1185 | >comp52_c1_seq1_5     | VLGERGPDMDEGDFSR             |
| >1186 | >comp9550_c0_seq1_6   | AVFPSIVGRPR                  |
| >1187 | >comp9550_c0_seq1_6   | DLYANTVLSGGTTMYPGIADR        |
| >1188 | >comp9550_c0_seq1_6   | GYSFTTTAEREIVR               |
| >1189 | >comp9550_c0_seq1_6   | HQGVMMVGMGQKDSYVGDEAQS       |
| >1190 | >comp9550_c0_seq1_6   | IKIIPPER                     |
| >1191 | >comp9550_c0_seq1_6   | IWHHTFYNELR                  |
| >1192 | >comp9550_c0_seq1_6   | KDLYANTVLSGGTTMYPGIADR       |
| >1193 | >comp9550_c0_seq1_6   | LDLAGRDLTDYLMK               |
| >1194 | >comp9550_c0_seq1_6   | QEYDESGPSIVHR                |
| >1195 | >comp9550_c0_seq1_6   | SYELPDGQVITIGNER             |
| >1196 | >comp9550_c0_seq1_6   | VAPEEHPVLLTEAPLNPK           |
| >1197 | >MMa35583             | LGISSDLFNK                   |
| >1198 | >MMa35583             | LGISSDLFNKLDVGK              |
| >1199 | >MMa35583             | LIELAEISR                    |
| >1200 | >MMa35583             | LNSLGNSLSNLEMLK              |
| >1201 | >comp105006_c0_seq1_4 | LATVISPR                     |
| >1202 | >MMa15302             | AVFPSIVGRPR                  |
| >1203 | >MMa15302             | DLYANTVLSGGTTMYPGIADR        |
| >1204 | >MMa15302             | EITALAPSTMK                  |
| >1205 | >MMa15302             | GYSFTTTAEREIVR               |

---

|       |                       |                         |
|-------|-----------------------|-------------------------|
| >1206 | >MMa15302             | HQGVMMVGMGQKDSYVGDEAQS  |
| >1207 | >MMa15302             | IKIIAPPER               |
| >1208 | >MMa15302             | IWHHTFYNELR             |
| >1209 | >MMa15302             | KDLYANTVLSGGTTMYPGIADR  |
| >1210 | >MMa15302             | LCYVALDFEQEMATAASSSSLEK |
| >1211 | >MMa15302             | LDLAGRDLTDYLMK          |
| >1212 | >MMa15302             | MQKEITALAPSTMK          |
| >1213 | >MMa15302             | QEYDESGPSIVHR           |
| >1214 | >MMa15302             | SYELPDGQVITIGNER        |
| >1215 | >MMa15302             | VAPEEHPVLLTEAPLNPK      |
| >1216 | >comp197_c0_seq1_4    | LSHPNTLIYPYINYILPGTK    |
| >1217 | >comp431_c0_seq1_5    | EKLDYSEMLISR            |
| >1218 | >comp431_c0_seq1_5    | FKEIYVGIK               |
| >1219 | >comp431_c0_seq1_5    | LFYLYGADPVIGISVAPNDK    |
| >1220 | >comp431_c0_seq1_5    | STFKDSYNQIFDEFGGFPLVK   |
| >1221 | >MMa42689             | CSEEYPGLCK              |
| >1222 | >MMa42689             | NGICAYLIGR              |
| >1223 | >MMa42689             | VLYTCNYGPAGNIK          |
| >1224 | >comp2191_c0_seq1_4   | YVLPDGSVLEIGPAR         |
| >1225 | >comp61_c0_seq1_2     | SNEANLAPYIPSQPR         |
| >1226 | >comp1024_c0_seq1_4   | VLLISFDGFR              |
| >1227 | >comp154040_c0_seq1_3 | IMNILGLVDIVKSNILNLIV    |
| >1228 | >MMa31039             | IISNEELNVIAGDVSPGK      |
| >1229 | >MMa31039             | IISNEELNVIAGDVSPGKGK    |
| >1230 | >MMa31039             | TKPAMFTDIR              |
| >1231 | >MMa50337             | ADIVMLITK               |
| >1232 | >MMa50337             | ADIVMLITKRPLGDYDEK      |
| >1233 | >MMa50337             | ADTVAHESAHLGCDHDGEGDER  |
| >1234 | >MMa50337             | DCPASDGYIMGDR           |
| >1235 | >MMa50337             | FSDNTAGIAFPNTVCR        |
| >1236 | >MMa50337             | GIAAEETLKNMAK           |
| >1237 | >MMa50337             | KFSDNTAGIAFPNTVCR       |
| >1238 | >MMa50337             | MLFNTLDLR               |
| >1239 | >MMa50337             | NSGDSMEVYLANLMNAVK      |
| >1240 | >MMa50337             | SNEANLAPYIPSQPR         |
| >1241 | >MMa50337             | STDILVLR                |
| >1242 | >MMa50337             | TGSKDCPASDGYIMGDR       |
| >1243 | >MMa50337             | VVIIGIHK                |
| >1244 | >MMa50337             | YGLVTDHSLNER            |
| >1245 | >comp106427_c0_seq1_6 | VATVPSIR                |
| >1246 | >comp544_c0_seq1_5    | LTLVCEDFENINQVHSALR     |
| >1247 | >MMa38659             | SFLIFPGTK               |

---

|       |                       |                            |
|-------|-----------------------|----------------------------|
| >1248 | >MMa05656             | CPASLGHFMSGR               |
| >1249 | >MMa05656             | ILGLAYPGTLCNK              |
| >1250 | >MMa05656             | VAIIGIIK                   |
| >1251 | >MMa05656             | VQTIMDSLGLK                |
| >1252 | >MMa56292             | ISYYSSDAMETISR             |
| >1253 | >MMa56292             | VTVQQLER                   |
| >1254 | >comp661_c0_seq1_2    | ADIVPLITRPLGTVHDDGSFDLK    |
| >1255 | >comp661_c0_seq1_2    | ADTVAHESAHTLGCDHGDGDDITGSK |
| >1256 | >comp661_c0_seq1_2    | CGKFILVADDSQANER           |
| >1257 | >comp661_c0_seq1_2    | FILVADDSQANER              |
| >1258 | >comp661_c0_seq1_2    | FYCISTDK                   |
| >1259 | >comp661_c0_seq1_2    | FYCISTDKLIQK               |
| >1260 | >comp661_c0_seq1_2    | GLDAGYTLDKMSK              |
| >1261 | >comp661_c0_seq1_2    | LAPYIATYPK                 |
| >1262 | >comp661_c0_seq1_2    | YAGLAYLNSACK               |
| >1263 | >comp4077_c0_seq1_2   | LTTLDISNNR                 |
| >1264 | >comp9550_c0_seq1_6   | DLYANTVLSGGTTMYPGIADR      |
| >1265 | >comp52_c1_seq1_5     | YLFNCDFKTESSDCQSQVEGANK    |
| >1266 | >comp66592_c0_seq1_6  | VVLLGLIK                   |
| >1267 | >comp347_c1_seq1_6    | ILGLAYPGTLCNK              |
| >1268 | >comp347_c1_seq1_6    | VAIIGIIK                   |
| >1269 | >comp347_c1_seq1_6    | VQTIMDSLGLK                |
| >1270 | >comp105006_c0_seq1_4 | LATVISPR                   |
| >1271 | >MMa15302             | DLYANTVLSGGTTMYPGIADR      |
| >1272 | >MMa15302             | LCYVALDFEQEMATAASSSSLEK    |
| >1273 | >comp61_c0_seq1_2     | ADIVMLITK                  |
| >1274 | >comp61_c0_seq1_2     | ADIVMLITKRPLGDYDEK         |
| >1275 | >comp61_c0_seq1_2     | ADTVAHESAHLGCDHDGEGDER     |
| >1276 | >comp61_c0_seq1_2     | DCPASDGYIMGDR              |
| >1277 | >comp61_c0_seq1_2     | FSDNTAGIAFPNTVCR           |
| >1278 | >comp61_c0_seq1_2     | GIAAEETLKNMAK              |
| >1279 | >comp61_c0_seq1_2     | KFSDNTAGIAFPNTVCR          |
| >1280 | >comp61_c0_seq1_2     | MLFNTLDLR                  |
| >1281 | >comp61_c0_seq1_2     | NSGDSMEVYLANLMNAVK         |
| >1282 | >comp61_c0_seq1_2     | SNEANLAPYIPSQPR            |
| >1283 | >comp61_c0_seq1_2     | STDILVLR                   |
| >1284 | >comp61_c0_seq1_2     | TGSKDCPASDGYIMGDR          |
| >1285 | >comp61_c0_seq1_2     | VVIIGIIK                   |
| >1286 | >comp61_c0_seq1_2     | YGLVTDHSLNER               |
| >1287 | >MMa50337             | ADIVMLITK                  |
| >1288 | >MMa50337             | ADTVAHESAHLGCDHDGEGDER     |
| >1289 | >MMa50337             | DCPASDGYIMGDR              |

---

|       |                       |                        |
|-------|-----------------------|------------------------|
| >1290 | >MMa50337             | FSDNTAGIAFPNTVCR       |
| >1291 | >MMa50337             | GIAAEETLKNMAK          |
| >1292 | >MMa50337             | KFSDNTAGIAFPNTVCR      |
| >1293 | >MMa50337             | MLFNTLDLR              |
| >1294 | >MMa50337             | NSGDSMEVYLANLMNAVK     |
| >1295 | >MMa50337             | SNEANLAPYIPSQPR        |
| >1296 | >MMa50337             | SVRNQLQVAESR           |
| >1297 | >MMa50337             | TGSKDCPASDGYIMGDR      |
| >1298 | >MMa50337             | VVIIGIIK               |
| >1299 | >MMa50337             | YGLVTDHSKLNER          |
| >1300 | >MMa05656             | ILGLAYPGTLCNK          |
| >1301 | >MMa05656             | VAIIGIIK               |
| >1302 | >MMa05656             | VQTIMDSLGLK            |
| >1303 | >MMa31039             | IISNEELNVIAGDVSPGK     |
| >1304 | >MMa31039             | IISNEELNVIAGDVSPGKGK   |
| >1305 | >MMa55199             | THINIVVIGHVDSGK        |
| >1306 | >MMa56292             | VTVQQLER               |
| >1307 | >MMa38659             | MVNKCNELLYR            |
| >1308 | >comp661_c0_seq1_2    | FILVADDSQANER          |
| >1309 | >comp661_c0_seq1_2    | FCISTDKLIQK            |
| >1310 | >comp661_c0_seq1_2    | GLDAGYTLDK             |
| >1311 | >comp661_c0_seq1_2    | GLDAGYTLDKMSK          |
| >1312 | >comp661_c0_seq1_2    | LTGEYEAKLAPYIATYPK     |
| >1313 | >comp661_c0_seq1_2    | YAGLAYLNSACK           |
| >1314 | >comp661_c0_seq1_2    | YAGLAYLNSACKK          |
| >1315 | >comp544_c0_seq1_5    | LTLVCEDFENINQVHSALR    |
| >1316 | >comp52_c1_seq1_5     | GAPAQYLDVNYVR          |
| >1317 | >comp66592_c0_seq1_6  | VVLLGLIK               |
| >1318 | >comp1172_c0_seq1_1   | NQIDSIDDSLYGLTK        |
| >1319 | >comp347_c1_seq1_6    | ILGLAYPGTLCNK          |
| >1320 | >comp347_c1_seq1_6    | VAIIGIIK               |
| >1321 | >comp347_c1_seq1_6    | VQTIMDSLGLK            |
| >1322 | >comp105006_c0_seq1_4 | LATVISPR               |
| >1323 | >comp61_c0_seq1_2     | ADIVMLITK              |
| >1324 | >comp61_c0_seq1_2     | ADTVAHESAHLGCDHDGEGDER |
| >1325 | >comp61_c0_seq1_2     | DCPASDGYIMGDR          |
| >1326 | >comp61_c0_seq1_2     | FSDNTAGIAFPNTVCR       |
| >1327 | >comp61_c0_seq1_2     | GIAAEETLKNMAK          |
| >1328 | >comp61_c0_seq1_2     | KFSDNTAGIAFPNTVCR      |
| >1329 | >comp61_c0_seq1_2     | MLFNTLDLR              |
| >1330 | >comp61_c0_seq1_2     | NSGDSMEVYLANLMNAVK     |
| >1331 | >comp61_c0_seq1_2     | SNEANLAPYIPSQPR        |



---

|       |                       |                         |
|-------|-----------------------|-------------------------|
| >1332 | >comp61_c0_seq1_2     | SVRNQLQVAESR            |
| >1333 | >comp61_c0_seq1_2     | TGSKDCPASDGYIMGDR       |
| >1334 | >comp61_c0_seq1_2     | VVIIGIIK                |
| >1335 | >comp61_c0_seq1_2     | YGLVTDHSKLNER           |
| >1336 | >comp1024_c0_seq1_4   | FGPLSQAVGK              |
| >1337 | >comp1024_c0_seq1_4   | TYHTPNFDYLAK            |
| >1338 | >MMa50337             | ADIVMLITK               |
| >1339 | >MMa50337             | ADIVMLITKRPLGDYDEK      |
| >1340 | >MMa50337             | ADTVAHESAHLGCDHDGEGDER  |
| >1341 | >MMa50337             | DCPASDGYIMGDR           |
| >1342 | >MMa50337             | FSDNTAGIAFPNTVCR        |
| >1343 | >MMa50337             | GIAAEETLKNMAK           |
| >1344 | >MMa50337             | KFSDNTAGIAFPNTVCR       |
| >1345 | >MMa50337             | MLFNTLDLR               |
| >1346 | >MMa50337             | NSGDSMEVYLANLMNAVK      |
| >1347 | >MMa50337             | SNEANLAPYIPSQPR         |
| >1348 | >MMa50337             | STDILVLR                |
| >1349 | >MMa50337             | SVRNQLQVAESR            |
| >1350 | >MMa50337             | TGSKDCPASDGYIMGDR       |
| >1351 | >MMa50337             | YGLVTDHSKLNER           |
| >1352 | >MMa05656             | ILGLAYPGTLCNK           |
| >1353 | >MMa31039             | IISNEELNVIAGDVSPGK      |
| >1354 | >MMa31039             | IISNEELNVIAGDVSPGKGK    |
| >1355 | >MMa31039             | ISAGVLSFSYENDCILEK      |
| >1356 | >MMa38659             | MVNKCNELLYR             |
| >1357 | >MMa38659             | SFLIFPGTK               |
| >1358 | >comp661_c0_seq1_2    | ADIVPLITRPLGTVHDDGSFDLK |
| >1359 | >comp661_c0_seq1_2    | FILVADDSQANER           |
| >1360 | >comp661_c0_seq1_2    | FYCISTDKLIQK            |
| >1361 | >comp661_c0_seq1_2    | GLDAGYTLDK              |
| >1362 | >comp661_c0_seq1_2    | GLDAGYTLDKMSK           |
| >1363 | >comp661_c0_seq1_2    | LAPYIATYPK              |
| >1364 | >comp661_c0_seq1_2    | LAPYIATYPKGLDAGYTLDK    |
| >1365 | >comp661_c0_seq1_2    | VAINGIIK                |
| >1366 | >comp661_c0_seq1_2    | YAGLAYLNSACK            |
| >1367 | >comp661_c0_seq1_2    | YAGLAYLNSACKK           |
| >1368 | >comp6508_c1_seq1_2   | VALNGIIK                |
| >1369 | >comp1172_c0_seq1_1   | NQIDSIDDSLYGLTK         |
| >1370 | >comp105006_c0_seq1_4 | LATVISPR                |
| >1371 | >comp61_c0_seq1_2     | ADIVMLITK               |
| >1372 | >comp61_c0_seq1_2     | ADIVMLITKRPLGDYDEK      |
| >1373 | >comp61_c0_seq1_2     | ADTVAHESAHLGCDHDGEGDER  |

---

|       |                     |                        |
|-------|---------------------|------------------------|
| >1374 | >comp61_c0_seq1_2   | DCPASDGYIMGDR          |
| >1375 | >comp61_c0_seq1_2   | FSDNTAGIAFPNTVCR       |
| >1376 | >comp61_c0_seq1_2   | GIAAEETLKNMAK          |
| >1377 | >comp61_c0_seq1_2   | KFSDNTAGIAFPNTVCR      |
| >1378 | >comp61_c0_seq1_2   | MLFNTLDLR              |
| >1379 | >comp61_c0_seq1_2   | NSGDSMEVYLANLMNAVK     |
| >1380 | >comp61_c0_seq1_2   | SNEANLAPYIPSQPR        |
| >1381 | >comp61_c0_seq1_2   | STDILVLR               |
| >1382 | >comp61_c0_seq1_2   | SVRNQLQVAESR           |
| >1383 | >comp61_c0_seq1_2   | TGSKDCPASDGYIMGDR      |
| >1384 | >comp61_c0_seq1_2   | VVIIGIIKHTK            |
| >1385 | >comp61_c0_seq1_2   | YGLVTDHSKLNER          |
| >1386 | >MMa41877           | FLYEFFPSLIGR           |
| >1387 | >MMa41877           | KLEDFTIGIGNLDYVSK      |
| >1388 | >MMa41877           | LEDFTIGIGNLDYVSK       |
| >1389 | >MMa41877           | LITLSLSANK             |
| >1390 | >MMa41877           | LITLSLSANKLQEVK        |
| >1391 | >MMa41877           | LVAISLEGNR             |
| >1392 | >MMa41877           | LVAISLEGNRIR           |
| >1393 | >MMa41877           | LVHPEAFSNHEKLITLSLSANK |
| >1394 | >MMa41877           | SLPEDMFIGMPK           |
| >1395 | >MMa41877           | SLQILHIDYINLK          |
| >1396 | >MMa41877           | SMLPNPAKELR            |
| >1397 | >MMa41877           | YLILSYNKLK             |
| >1398 | >comp365_c0_seq3_2  | DIMEDCRCNEFSR          |
| >1399 | >comp1201_c0_seq2_1 | YLFNFQMK               |
| >1400 | >MMa04250           | SLGVAVEGVDPQYADGK      |
| >1401 | >comp1468_c0_seq1_6 | AWDMWSFDGNNYQLR        |
| >1402 | >comp1468_c0_seq1_6 | ELGPIKDDTVLILNQSSGEIIR |
| >1403 | >comp1468_c0_seq1_6 | FTPNNKPSIVLGEEFTPGSDR  |
| >1404 | >comp1468_c0_seq1_6 | ILCYSVENNDSFGK         |
| >1405 | >comp1468_c0_seq1_6 | ISVEEEINWPHK           |
| >1406 | >comp1468_c0_seq1_6 | ISVEEEINWPHKSTLK       |
| >1407 | >comp1468_c0_seq1_6 | MIIPHSLSMIEEK          |
| >1408 | >comp1468_c0_seq1_6 | MIIPHSLSMIEEKK         |
| >1409 | >comp1468_c0_seq1_6 | MNNGNIINTWHSK          |
| >1410 | >comp1468_c0_seq1_6 | QVSGIDVDKLGNVHVLHR     |
| >1411 | >MMa05656           | ILGLAYPGTLCNK          |
| >1412 | >MMa05656           | VQTIMDSLGLK            |
| >1413 | >MMa31039           | FVLTAHCYDDER           |
| >1414 | >MMa31039           | IISNEELNVIAGDVSPGK     |
| >1415 | >MMa31039           | IISNEELNVIAGDVSPGKGK   |

---

|       |                       |                           |
|-------|-----------------------|---------------------------|
| >1416 | >MMa31039             | ISAGVLSFSYENDCILEK        |
| >1417 | >MMa31039             | KFVLTAAHCVYDDER           |
| >1418 | >MMa31039             | TKPAMFTDIR                |
| >1419 | >comp545_c0_seq1_1    | AGVHLLGTNGAIPAHK          |
| >1420 | >comp545_c0_seq1_1    | DAPPLELPK                 |
| >1421 | >comp545_c0_seq1_1    | ESYLCTSFK                 |
| >1422 | >comp545_c0_seq1_1    | FINGGTDNSGIVLTLLPGDDQSVTK |
| >1423 | >comp545_c0_seq1_1    | FNMLMPDVQPLQK             |
| >1424 | >comp545_c0_seq1_1    | GSGINYLVLQVHYADVTK        |
| >1425 | >comp545_c0_seq1_1    | HDPLEPQMFYPVENQDLTIEK     |
| >1426 | >comp545_c0_seq1_1    | IEQPVTLHPFAFR             |
| >1427 | >comp14308_c0_seq1_2  | KNVASTIYQR                |
| >1428 | >comp52_c1_seq1_5     | GANVAGSNSNNQFEVQLDR       |
| >1429 | >comp52_c1_seq1_5     | LADQCVFKHDCDECR           |
| >1430 | >comp52_c1_seq1_5     | SHSISYLG LCK              |
| >1431 | >comp52_c1_seq1_5     | TESSSDCQSQVEGANKWQTR      |
| >1432 | >comp52_c1_seq1_5     | TVTLNGGETTTLK             |
| >1433 | >comp52_c1_seq1_5     | VGCGYVSFEK                |
| >1434 | >comp101207_c0_seq1_4 | EHVDILIK                  |
| >1435 | >comp2213_c0_seq1_5   | VVGILLGSWK                |
| >1436 | >comp1965_c0_seq1_5   | MPLIGLGT FQSNK            |
| >1437 | >comp1965_c0_seq1_5   | TPAQILLR                  |
| >1438 | >comp347_c1_seq1_6    | ILGLAYPGTLCNK             |
| >1439 | >comp347_c1_seq1_6    | VQTIMDSL DLGLK            |
| >1440 | >comp105006_c0_seq1_4 | LATVISPR                  |
| >1441 | >MMa21329             | DASYDEIKAAVK              |
| >1442 | >MMa21329             | GAGQNIIPASTGAAK           |
| >1443 | >MMa21329             | LIAWYDNEYGYSNR            |
| >1444 | >MMa21329             | VPTPDVSVVDLTCR            |
| >1445 | >comp61_c0_seq1_2     | FSDNTAGIAFPNTVCR          |
| >1446 | >comp61_c0_seq1_2     | GIAAEETLKNMAK             |
| >1447 | >comp61_c0_seq1_2     | MLFNTLDLR                 |
| >1448 | >comp61_c0_seq1_2     | SNEANLAPYIPSQPR           |
| >1449 | >comp61_c0_seq1_2     | TGSKDCPASDGYIMGDR         |
| >1450 | >comp61_c0_seq1_2     | YGLVTDH SKLNER            |
| >1451 | >MMa50337             | ADIVMLITK                 |
| >1452 | >MMa50337             | ADIVMLITKRPLGDYDEK        |
| >1453 | >MMa50337             | DCPASDGYIMGDR             |
| >1454 | >MMa50337             | FSDNTAGIAFPNTVCR          |
| >1455 | >MMa50337             | GIAAEETLKNMAK             |
| >1456 | >MMa50337             | IKVVIIGIIK                |
| >1457 | >MMa50337             | KFSDNTAGIAFPNTVCR         |

---

|       |                       |                     |
|-------|-----------------------|---------------------|
| >1458 | >MMa50337             | KNSGDSMEVYLANLMNAVK |
| >1459 | >MMa50337             | MLFNTLDLR           |
| >1460 | >MMa50337             | NSGDSMEVYLANLMNAVK  |
| >1461 | >MMa50337             | SNEANLAPYIPSQPR     |
| >1462 | >MMa50337             | STDILVLR            |
| >1463 | >MMa50337             | SVRNQLQVAESR        |
| >1464 | >MMa50337             | TGSKDCPASDGYIMGDR   |
| >1465 | >MMa50337             | VVIIGIIK            |
| >1466 | >MMa50337             | YGLVTDHSLNER        |
| >1467 | >MMa05656             | ILGLAYPGTLCNK       |
| >1468 | >MMa05656             | VQTIMDSLGLK         |
| >1469 | >comp66592_c0_seq1_6  | LKVLLGLIK           |
| >1470 | >comp66592_c0_seq1_6  | VVLLGLIK            |
| >1471 | >comp61_c0_seq1_2     | ADIVMLITK           |
| >1472 | >comp61_c0_seq1_2     | ADIVMLITKRPLGDYDEK  |
| >1473 | >comp61_c0_seq1_2     | DCPASDGYIMGDR       |
| >1474 | >comp61_c0_seq1_2     | FSDNTAGIAFPNTVCR    |
| >1475 | >comp61_c0_seq1_2     | GIAAEETLKNMAK       |
| >1476 | >comp61_c0_seq1_2     | IKVVIIGIIK          |
| >1477 | >comp61_c0_seq1_2     | KFSDNTAGIAFPNTVCR   |
| >1478 | >comp61_c0_seq1_2     | KNSGDSMEVYLANLMNAVK |
| >1479 | >comp61_c0_seq1_2     | MLFNTLDLR           |
| >1480 | >comp61_c0_seq1_2     | NSGDSMEVYLANLMNAVK  |
| >1481 | >comp61_c0_seq1_2     | SNEANLAPYIPSQPR     |
| >1482 | >comp61_c0_seq1_2     | STDILVLR            |
| >1483 | >comp61_c0_seq1_2     | SVRNQLQVAESR        |
| >1484 | >comp61_c0_seq1_2     | TGSKDCPASDGYIMGDR   |
| >1485 | >comp61_c0_seq1_2     | VVIIGIIK            |
| >1486 | >comp61_c0_seq1_2     | VVIIGIIKHTK         |
| >1487 | >comp61_c0_seq1_2     | YGLVTDHSLNER        |
| >1488 | >comp661_c0_seq1_2    | FILVADDSQANER       |
| >1489 | >comp105006_c0_seq1_4 | LATVISPR            |
| >1490 | >comp347_c1_seq1_6    | ILGLAYPGTLCNK       |
| >1491 | >comp347_c1_seq1_6    | VQTIMDSLGLK         |
| >1492 | >comp38617_c0_seq1_5  | YRSPTLDLR           |
| >1493 | >comp22670_c0_seq1_5  | VSLVMILKEK          |
| >1494 | >MMa50337             | ADIVMLITK           |
| >1495 | >MMa50337             | ADIVMLITKRPLGDYDEK  |
| >1496 | >MMa50337             | DCPASDGYIMGDR       |
| >1497 | >MMa50337             | FSDNTAGIAFPNTVCR    |
| >1498 | >MMa50337             | GIAAEETLKNMAK       |
| >1499 | >MMa50337             | KFSDNTAGIAFPNTVCR   |

---

|       |                       |                            |
|-------|-----------------------|----------------------------|
| >1500 | >MMa50337             | KNSGDSMEVYLANLMNAVK        |
| >1501 | >MMa50337             | MLFNTLDLR                  |
| >1502 | >MMa50337             | MLFNTLDLRIK                |
| >1503 | >MMa50337             | NSGDSMEVYLANLMNAVK         |
| >1504 | >MMa50337             | SNEANLAPYIPSQPR            |
| >1505 | >MMa50337             | STDILVLR                   |
| >1506 | >MMa50337             | SVRNQLQVAESR               |
| >1507 | >MMa50337             | VVIIGIIK                   |
| >1508 | >MMa50337             | YGLVTDHSLNER               |
| >1509 | >MMa38659             | MVEMIEVNTYIGGK             |
| >1510 | >MMa38659             | MVEMIEVNTYIGGKK            |
| >1511 | >MMa38659             | MVNKCNELLYR                |
| >1512 | >comp661_c0_seq1_2    | FILVADDSQANER              |
| >1513 | >MMa05656             | ILGLAYPGTLCNK              |
| >1514 | >comp66592_c0_seq1_6  | VVLLGLIK                   |
| >1515 | >comp347_c1_seq1_6    | ILGLAYPGTLCNK              |
| >1516 | >comp105006_c0_seq1_4 | LATVISPR                   |
| >1517 | >MMa27185             | EYICAGVSDGTK               |
| >1518 | >comp61_c0_seq1_2     | ADIVMLITK                  |
| >1519 | >comp61_c0_seq1_2     | ADIVMLITKRPLGDYDEK         |
| >1520 | >comp61_c0_seq1_2     | DCPASDGYIMGDR              |
| >1521 | >comp61_c0_seq1_2     | FSDNTAGIAFPNTVCR           |
| >1522 | >comp61_c0_seq1_2     | GIAAEETLKNMAK              |
| >1523 | >comp61_c0_seq1_2     | KFSDNTAGIAFPNTVCR          |
| >1524 | >comp61_c0_seq1_2     | KNSGDSMEVYLANLMNAVK        |
| >1525 | >comp61_c0_seq1_2     | MLFNTLDLR                  |
| >1526 | >comp61_c0_seq1_2     | MLFNTLDLRIK                |
| >1527 | >comp61_c0_seq1_2     | NSGDSMEVYLANLMNAVK         |
| >1528 | >comp61_c0_seq1_2     | SNEANLAPYIPSQPR            |
| >1529 | >comp61_c0_seq1_2     | STDILVLR                   |
| >1530 | >comp61_c0_seq1_2     | SVRNQLQVAESR               |
| >1531 | >comp61_c0_seq1_2     | VVIIGIIK                   |
| >1532 | >comp61_c0_seq1_2     | VVIIGIIKHTK                |
| >1533 | >comp61_c0_seq1_2     | YGLVTDHSLNER               |
| >1534 | >MMa50337             | ADIVMLITK                  |
| >1535 | >MMa50337             | ADIVMLITKRPLGDYDEK         |
| >1536 | >MMa50337             | ADTVAHESAHLGCDHDGEGDER     |
| >1537 | >MMa50337             | ADTVAHESAHLGCDHDGEGDERTGSK |
| >1538 | >MMa50337             | DCPASDGYIMGDR              |
| >1539 | >MMa50337             | DCPASDGYIMGDRNK            |
| >1540 | >MMa50337             | FSDNTAGIAFPNTVCR           |
| >1541 | >MMa50337             | FSDNTAGIAFPNTVCRQCYK       |

---

|       |                       |                            |
|-------|-----------------------|----------------------------|
| >1542 | >MMa50337             | GIAAEETLKNMAK              |
| >1543 | >MMa50337             | IKVVIIGIIK                 |
| >1544 | >MMa50337             | KFSDNTAGIAFPNTVCR          |
| >1545 | >MMa50337             | KNSGDSMEVYLANLMNAVK        |
| >1546 | >MMa50337             | MLFNTLDLR                  |
| >1547 | >MMa50337             | MLFNTLDLRIK                |
| >1548 | >MMa50337             | NSGDSMEVYLANLMNAVK         |
| >1549 | >MMa50337             | SNEANLAPYIPSQPR            |
| >1550 | >MMa50337             | STDILVLR                   |
| >1551 | >MMa50337             | SVRNQLQVAESR               |
| >1552 | >MMa50337             | TGSKDCPASDGYIMGDR          |
| >1553 | >MMa50337             | YGLVTDHSKLNER              |
| >1554 | >MMa05656             | ILGLAYPGTLCNK              |
| >1555 | >MMa31039             | IISNEELNVIAGDVSPGK         |
| >1556 | >MMa38659             | HESSFLKDLLSIN              |
| >1557 | >MMa38659             | KLVD CYLYGDSYIIGK          |
| >1558 | >MMa38659             | LVDCYLYGDSYIIGK            |
| >1559 | >MMa38659             | MLEMVPVK                   |
| >1560 | >MMa38659             | MVEMIEVNTYIGGK             |
| >1561 | >MMa38659             | MVEMIEVNTYIGGKK            |
| >1562 | >MMa38659             | MVNKCNELLYR                |
| >1563 | >MMa38659             | SFLIFPGTK                  |
| >1564 | >comp661_c0_seq1_2    | FILVADDSQANER              |
| >1565 | >comp4077_c0_seq1_2   | LTTLDISNR                  |
| >1566 | >MMa04441             | NYDVNTILFR                 |
| >1567 | >comp13064_c0_seq1_5  | SSELLVIR                   |
| >1568 | >comp66592_c0_seq1_6  | LKVLLGLIK                  |
| >1569 | >comp105006_c0_seq1_4 | LATVISPR                   |
| >1570 | >comp61_c0_seq1_2     | ADIVMLITK                  |
| >1571 | >comp61_c0_seq1_2     | ADIVMLITKRPLGDYDEK         |
| >1572 | >comp61_c0_seq1_2     | ADTVAHESAHLGCDHDGEGDER     |
| >1573 | >comp61_c0_seq1_2     | ADTVAHESAHLGCDHDGEGDERTGSK |
| >1574 | >comp61_c0_seq1_2     | DCPASDGYIMGDR              |
| >1575 | >comp61_c0_seq1_2     | DCPASDGYIMGDRNK            |
| >1576 | >comp61_c0_seq1_2     | FSDNTAGIAFPNTVCR           |
| >1577 | >comp61_c0_seq1_2     | FSDNTAGIAFPNTVCRQCYK       |
| >1578 | >comp61_c0_seq1_2     | GIAAEETLKNMAK              |
| >1579 | >comp61_c0_seq1_2     | IKVVIIGIIK                 |
| >1580 | >comp61_c0_seq1_2     | KFSDNTAGIAFPNTVCR          |
| >1581 | >comp61_c0_seq1_2     | KNSGDSMEVYLANLMNAVK        |
| >1582 | >comp61_c0_seq1_2     | MLFNTLDLR                  |
| >1583 | >comp61_c0_seq1_2     | MLFNTLDLRIK                |

---

|       |                       |                          |
|-------|-----------------------|--------------------------|
| >1584 | >comp61_c0_seq1_2     | NSGDSMEVYLANLMNAVK       |
| >1585 | >comp61_c0_seq1_2     | SNEANLAPYIPSQPR          |
| >1586 | >comp61_c0_seq1_2     | STDILVLR                 |
| >1587 | >comp61_c0_seq1_2     | SVRNQLQVAESR             |
| >1588 | >comp61_c0_seq1_2     | TGSKDCPASDGYIMGDR        |
| >1589 | >comp61_c0_seq1_2     | YGLVTDHSKLNER            |
| >1590 | >MMa33253             | QEPGGDGTEIWNGIK          |
| >1591 | >MMa33253             | YDPSVQPQMLAR             |
| >1592 | >MMa17865             | SELWNYNTNK               |
| >1593 | >MMa17865             | VWCVINNECNSECK           |
| >1594 | >MMa17864             | IWCVINNECNSECK           |
| >1595 | >MMa02192             | VSCLWGNEGCNKECR          |
| >1596 | >comp627_c0_seq1_2    | ADLSNNLITR               |
| >1597 | >comp627_c0_seq1_2    | FGLFLFFPSLEK             |
| >1598 | >MMa05656             | ILGLAYPGTLCNK            |
| >1599 | >MMa05656             | VQTIMDSLGLK              |
| >1600 | >MMa31039             | DETPVIQLGWGEFALDSGFSQTLK |
| >1601 | >MMa31039             | FVLTAHCVYDDER            |
| >1602 | >MMa31039             | FVLTAHCVYDDERR           |
| >1603 | >MMa31039             | GFYLNITCR                |
| >1604 | >MMa31039             | IISNEELNVIAGDVSPGK       |
| >1605 | >MMa31039             | IISNEELNVIAGDVSPGKGK     |
| >1606 | >MMa31039             | ISAGVLSFSYENDCILEK       |
| >1607 | >MMa31039             | KFVLTAHCVYDDER           |
| >1608 | >MMa31039             | KIISNEELNVIAGDVSPGK      |
| >1609 | >MMa31039             | SEGDRITCHGDSGGPMVITK     |
| >1610 | >MMa31039             | TICLTDEGYDLK             |
| >1611 | >MMa31039             | TKPAMFTDIR               |
| >1612 | >MMa31039             | TQTKDNTICWVQK            |
| >1613 | >comp265_c0_seq1_1    | LSVIIGIHR                |
| >1614 | >comp38_c0_seq1_5     | VSECLNNYCNICTK           |
| >1615 | >MMa38659             | MVEMIEVNTYIGGK           |
| >1616 | >comp545_c0_seq1_1    | IEQPVTLHPFAFR            |
| >1617 | >comp1072_c0_seq1_4   | LIELAEISR                |
| >1618 | >comp16672_c0_seq10_5 | TLLDLKDK                 |
| >1619 | >comp52_c1_seq1_5     | GAPAQYLDVNYVR            |
| >1620 | >MMa35583             | LIELAEISR                |
| >1621 | >comp1172_c0_seq1_1   | IPINALISLER              |
| >1622 | >comp347_c1_seq1_6    | ILGLAYPGTLCNK            |
| >1623 | >comp347_c1_seq1_6    | VQTIMDSLGLK              |
| >1624 | >comp105006_c0_seq1_4 | LATVISPR                 |
| >1625 | >MMa08776             | ISVSGLGPLNSTVK           |

---

|       |                       |                        |
|-------|-----------------------|------------------------|
| >1626 | >MMa08776             | ISVSGLGPLNSTVKK        |
| >1627 | >MMa08776             | QSNSFMDAVLQNVK         |
| >1628 | >MMa08776             | QSNSFMDAVLQNVKTEGR     |
| >1629 | >MMa27185             | YYAVGIVSFGK            |
| >1630 | >MMa17864             | SELWAYETNK             |
| >1631 | >MMa05656             | CPASLGHFMSGSR          |
| >1632 | >MMa05656             | ILGLAYPGTLCNK          |
| >1633 | >MMa05656             | VAIIGIIK               |
| >1634 | >MMa05656             | VQTIMDSLGLK            |
| >1635 | >MMa17865             | VWCVINNESECK           |
| >1636 | >MMa31039             | FVLTAHCVYDDER          |
| >1637 | >MMa31039             | FVLTAHCVYDDERR         |
| >1638 | >MMa31039             | GNQKISAGVLSFSYENDCILEK |
| >1639 | >MMa31039             | IISNEELNVIAGDVSPGK     |
| >1640 | >MMa31039             | IISNEELNVIAGDVSPGKGK   |
| >1641 | >MMa31039             | ISAGVLSFSYENDCILEK     |
| >1642 | >MMa31039             | KFVLTAHCVYDDER         |
| >1643 | >MMa31039             | KIISNEELNVIAGDVSPGK    |
| >1644 | >MMa31039             | SEGDRTHGDSGGPMVITK     |
| >1645 | >MMa31039             | TICLTDEGYDLK           |
| >1646 | >MMa31039             | TKPAMFTDIR             |
| >1647 | >MMa31039             | TQTKDNTICWVQK          |
| >1648 | >comp38_c0_seq1_5     | VSECLLNNYCNNICTK       |
| >1649 | >comp1072_c0_seq1_4   | LIELAEISR              |
| >1650 | >comp20_c0_seq1_3     | YAVPEGTLR              |
| >1651 | >MMa35583             | LIELAEISR              |
| >1652 | >MMa33253             | QEPGGDGTEIWNGIK        |
| >1653 | >comp1172_c0_seq1_1   | IPINALISLER            |
| >1654 | >comp347_c1_seq1_6    | ILGLAYPGTLCNK          |
| >1655 | >comp347_c1_seq1_6    | VAIIGIIK               |
| >1656 | >comp347_c1_seq1_6    | VQTIMDSLGLK            |
| >1657 | >comp105006_c0_seq1_4 | LATVISPR               |
| >1658 | >comp627_c0_seq1_2    | ADLSNNLITR             |
| >1659 | >comp627_c0_seq1_2    | AENLQIVSLKGNR          |
| >1660 | >MMa17865             | VWCVINNESECK           |
| >1661 | >MMa17864             | IWCVINNESECK           |
| >1662 | >MMa08776             | ISVSGLGPLNSTVKK        |
| >1663 | >MMa08776             | ISVSGLGPLNSTVKK        |
| >1664 | >MMa08776             | QSNSFMDAVLQNVK         |
| >1665 | >MMa08776             | QSNSFMDAVLQNVKTEGR     |
| >1666 | >comp627_c0_seq1_2    | ADLSNNLITR             |
| >1667 | >MMa05656             | ILGLAYPGTLCNK          |



---

|       |                       |                           |
|-------|-----------------------|---------------------------|
| >1668 | >MMa05656             | VAIIGIIK                  |
| >1669 | >MMa05656             | VQTIMDSLGLK               |
| >1670 | >MMa31039             | DETPVIQLGWGEFALDSGFSQTLK  |
| >1671 | >MMa31039             | FVLTAHCVYDDER             |
| >1672 | >MMa31039             | FVLTAHCVYDDERR            |
| >1673 | >MMa31039             | GNQKISAGVLSFSYENDCILEK    |
| >1674 | >MMa31039             | IISNEELNVIAGDVSPGK        |
| >1675 | >MMa31039             | IISNEELNVIAGDVSPGKGK      |
| >1676 | >MMa31039             | ISAGVLSFSYENDCILEK        |
| >1677 | >MMa31039             | KFVLTAHCVYDDER            |
| >1678 | >MMa31039             | KIISNEELNVIAGDVSPGK       |
| >1679 | >MMa31039             | TICLTDEGYDLK              |
| >1680 | >MMa31039             | TKPAMFTDIR                |
| >1681 | >MMa31039             | TQTKDNTICWVQK             |
| >1682 | >MMa31039             | YLPVSEIYTYNGYNGNWNVDIAILK |
| >1683 | >comp265_c0_seq1_1    | LSVIIGIHR                 |
| >1684 | >comp52_c1_seq1_5     | GAPAQYLDVNYVR             |
| >1685 | >comp52_c1_seq1_5     | SHSISYGLCK                |
| >1686 | >comp52_c1_seq1_5     | VGCGYVSFEK                |
| >1687 | >MMa33253             | QEPGGDGTEIWNGIK           |
| >1688 | >MMa33253             | YDPSVQPQMLAR              |
| >1689 | >comp347_c1_seq1_6    | ILGLAYPGTLCNK             |
| >1690 | >comp347_c1_seq1_6    | VAIIGIIK                  |
| >1691 | >comp347_c1_seq1_6    | VQTIMDSLGLK               |
| >1692 | >comp105006_c0_seq1_4 | LATVISPR                  |
| >1693 | >MMa42691             | IGCGVAGYTEANTK            |
| >1694 | >MMa42691             | VIAGGSVSDSKETILK          |
| >1695 | >MMa27185             | EYICAGVSDGTK              |
| >1696 | >MMa27185             | GTDCGGALITNR              |
| >1697 | >MMa27185             | YYAVGIVSFGK               |
| >1698 | >MMa27185             | YYAVGIVSFGKR              |
| >1699 | >comp10779_c0_seq1_6  | EGQYILSLLNK               |
| >1700 | >comp1581_c0_seq1_5   | GIVLSGPATCTK              |
| >1701 | >comp49065_c0_seq1_5  | VALIAVIK                  |
| >1702 | >MMa05656             | ILGLAYPGTLCNK             |
| >1703 | >MMa05656             | VQTIMDSLGLK               |
| >1704 | >MMa31039             | FVLTAHCVYDDER             |
| >1705 | >MMa31039             | GNQKISAGVLSFSYENDCILEK    |
| >1706 | >MMa31039             | IISNEELNVIAGDVSPGK        |
| >1707 | >MMa31039             | IISNEELNVIAGDVSPGKGK      |
| >1708 | >MMa31039             | ISAGVLSFSYENDCILEK        |
| >1709 | >MMa31039             | KFVLTAHCVYDDER            |

---

|       |                       |                       |
|-------|-----------------------|-----------------------|
| >1710 | >MMa31039             | KIISNEELNVIAGDVSPGK   |
| >1711 | >MMa31039             | TICLTDEGYDLK          |
| >1712 | >MMa31039             | TKPAMFTDIR            |
| >1713 | >MMa31039             | TQTKDNTICWVQK         |
| >1714 | >comp1072_c0_seq1_4   | LIELAEISR             |
| >1715 | >comp627_c0_seq1_2    | ADLSNNLITR            |
| >1716 | >comp627_c0_seq1_2    | AENLQIVSLKGNR         |
| >1717 | >MMa35583             | LIELAEISR             |
| >1718 | >MMa30301             | GIVLSGPATCTK          |
| >1719 | >comp1172_c0_seq1_1   | IPINALISLER           |
| >1720 | >comp347_c1_seq1_6    | ILGLAYPGTLCNK         |
| >1721 | >comp347_c1_seq1_6    | VQTIMDSLGLK           |
| >1722 | >comp105006_c0_seq1_4 | LATVISPR              |
| >1723 | >MMa27185             | YYAVGIVSFGK           |
| >1724 | >comp61_c0_seq1_2     | SNEANLAPYIPSQPR       |
| >1725 | >MMa08776             | GNTAFAAFTTSMNR        |
| >1726 | >MMa08776             | ISVSGLGPLNSTVK        |
| >1727 | >comp1581_c0_seq1_5   | CYIFIKMESNESYIINNSGLK |
| >1728 | >comp1581_c0_seq1_5   | GIVLSGPATCTK          |
| >1729 | >comp1581_c0_seq1_5   | VFYEMAPSLDK           |
| >1730 | >comp1581_c0_seq1_5   | VFYEMAPSLDKTFK        |
| >1731 | >comp49065_c0_seq1_5  | VALIAVIK              |
| >1732 | >MMa05656             | ENESSLAPYIPQSPK       |
| >1733 | >MMa05656             | ILGLAYPGTLCNK         |
| >1734 | >MMa05656             | VQTIMDSLGLK           |
| >1735 | >MMa31039             | FVLTAHCVYDDER         |
| >1736 | >MMa31039             | FVLTAHCVYDDERR        |
| >1737 | >MMa31039             | IISNEELNVIAGDVSPGK    |
| >1738 | >MMa31039             | IISNEELNVIAGDVSPGKGK  |
| >1739 | >MMa31039             | ISAGVLSFSYENDCILEK    |
| >1740 | >MMa31039             | KFVLTAHCVYDDER        |
| >1741 | >MMa31039             | KIISNEELNVIAGDVSPGK   |
| >1742 | >MMa31039             | TICLTDEGYDLK          |
| >1743 | >MMa31039             | TKPAMFTDIR            |
| >1744 | >MMa31039             | TQTKDNTICWVQK         |
| >1745 | >comp627_c0_seq1_2    | ADLSNNLITR            |
| >1746 | >comp627_c0_seq1_2    | AENLQIVSLKGNR         |
| >1747 | >comp52_c1_seq1_5     | VGCGYVSFEK            |
| >1748 | >MMa33253             | YDPSVQPQMLAR          |
| >1749 | >MMa30301             | GIVLSGPATCTK          |
| >1750 | >MMa30301             | MESNESYIINNSGLK       |
| >1751 | >comp347_c1_seq1_6    | ENESSLAPYIPQSPK       |

---

|       |                       |                          |
|-------|-----------------------|--------------------------|
| >1752 | >comp347_c1_seq1_6    | ILGLAYPGTLCNK            |
| >1753 | >comp347_c1_seq1_6    | VQTIMDSLGLK              |
| >1754 | >comp105006_c0_seq1_4 | LATVISPR                 |
| >1755 | >comp8549_c0_seq1_5   | TEQICNVISK               |
| >1756 | >MMa27185             | DSCQGDSGGPLMLPSEEPNSDISR |
| >1757 | >MMa27185             | EYICAGVSDGTK             |
| >1758 | >MMa27185             | YYAVGIVSFGK              |
| >1759 | >MMa27185             | YYAVGIVSFGKR             |
| >1760 | >MMa28760             | YSFTYALVR                |
| >1761 | >comp1024_c0_seq1_4   | LLETFLDR                 |
| >1762 | >comp1024_c0_seq1_4   | VLLISFDGFR               |
| >1763 | >comp1024_c0_seq1_4   | WWGGEPIWVTTR             |
| >1764 | >MMa17865             | KSELWNYNTNK              |
| >1765 | >MMa17865             | VWCVINNESCNSECK          |
| >1766 | >MMa17864             | IWCVINNESCNSECK          |
| >1767 | >comp1678_c0_seq2_6   | KQVLQIPK                 |
| >1768 | >MMa05656             | ILGLAYPGTLCNK            |
| >1769 | >MMa42689             | CSEEYPGLCK               |
| >1770 | >MMa55199             | IGGIGTPVGR               |
| >1771 | >comp38_c0_seq1_5     | VSECLLNNYCNNICTK         |
| >1772 | >comp545_c0_seq1_1    | ESYLCTSK                 |
| >1773 | >comp545_c0_seq1_1    | IEQPVTLHPFAFR            |
| >1774 | >comp1072_c0_seq1_4   | AVISLKFLYNLK             |
| >1775 | >comp1072_c0_seq1_4   | ITELKDSLQELR             |
| >1776 | >comp1072_c0_seq1_4   | LGISSNLFNK               |
| >1777 | >comp1072_c0_seq1_4   | LGISSNLFNKLDVGK          |
| >1778 | >comp1072_c0_seq1_4   | LIELAEISR                |
| >1779 | >comp1072_c0_seq1_4   | MLTMIYNDLK               |
| >1780 | >comp1072_c0_seq1_4   | TLTNELTGLK               |
| >1781 | >comp1072_c0_seq2_4   | CPAYTGPCDCVFSR           |
| >1782 | >comp544_c0_seq1_5    | LTLVCEDFENINQVHSALR      |
| >1783 | >comp1072_c0_seq3_6   | LYLPLHDLPTIFANQGNCLR     |
| >1784 | >comp52_c1_seq1_5     | GAPAQYLDVNYVR            |
| >1785 | >comp52_c1_seq1_5     | LADQCVFKHDCDECR          |
| >1786 | >comp52_c1_seq1_5     | VGCGYVSFEK               |
| >1787 | >MMa31039             | ISAGVLSFSYENDCILEK       |
| >1788 | >comp1072_c0_seq4_6   | NFEDINQVQNALR            |
| >1789 | >MMa35583             | LIELAEISR                |
| >1790 | >comp105006_c0_seq1_4 | LATVISPR                 |
| >1791 | >comp197_c0_seq1_4    | AKHPDWSPAQIEK            |
| >1792 | >comp197_c0_seq1_4    | DQPSEYFCK                |
| >1793 | >comp197_c0_seq1_4    | DVIAPVASTVIQNVNR         |

---

|       |                     |                             |
|-------|---------------------|-----------------------------|
| >1794 | >comp197_c0_seq1_4  | HPDWSPAQIEK                 |
| >1795 | >comp197_c0_seq1_4  | ILVNQEETFNGDK               |
| >1796 | >comp197_c0_seq1_4  | IVIFYESQLGK                 |
| >1797 | >comp197_c0_seq1_4  | LSHPNTLIYPYINYILPGTK        |
| >1798 | >comp197_c0_seq1_4  | NDIQEANDKLSWLWK             |
| >1799 | >comp197_c0_seq1_4  | QSTALCPSIYMQESHITK          |
| >1800 | >comp197_c0_seq1_4  | TVPSMDFKR                   |
| >1801 | >comp197_c0_seq1_4  | TYVKDVIAPVASTVIQNVNR        |
| >1802 | >comp197_c0_seq1_4  | VAIEEWENSAK                 |
| >1803 | >comp197_c0_seq1_4  | VAIEEWENSAKEWMLK            |
| >1804 | >comp197_c0_seq1_4  | VVWEVPSIMCSK                |
| >1805 | >MMa42691           | AMEDGIVYSGK                 |
| >1806 | >MMa42691           | APSTDDYLLYCQFSDKDSK         |
| >1807 | >MMa42691           | CSEEYPGLCK                  |
| >1808 | >MMa42691           | DASPQYFEFKEYGVR             |
| >1809 | >MMa42691           | FGPNDASEKPGSFVSFEFSAPGLIFPK |
| >1810 | >MMa42691           | IGCGVAGYTEANTK              |
| >1811 | >MMa42691           | IGCGVAGYTEANTKK             |
| >1812 | >MMa42691           | KDASPQYFEFK                 |
| >1813 | >MMa42691           | LSKDHTFCMASTCK              |
| >1814 | >MMa42691           | TSSSWNTIGILMK               |
| >1815 | >MMa42691           | VIAGGSVSDSDKETILK           |
| >1816 | >comp1024_c0_seq1_4 | FGPLSQAVGK                  |
| >1817 | >comp1024_c0_seq1_4 | IMPLIAVADPGYLIAR            |
| >1818 | >comp1024_c0_seq1_4 | LLETFLDDR                   |
| >1819 | >comp1024_c0_seq1_4 | MQEEVKWMPLSGPVAGILPYEGK     |
| >1820 | >comp1024_c0_seq1_4 | MVETIDKLVGFLLEK             |
| >1821 | >comp1024_c0_seq1_4 | RIMPLIAVADPGYLIAR           |
| >1822 | >comp1024_c0_seq1_4 | SGVYFWPASDIPIK              |
| >1823 | >comp1024_c0_seq1_4 | VLLISFDGFR                  |
| >1824 | >comp1024_c0_seq1_4 | WMPLSGPVAGILPYEGK           |
| >1825 | >comp1024_c0_seq1_4 | WMPLSGPVAGILPYEGKR          |
| >1826 | >comp1024_c0_seq1_4 | WWGGEPIWVTTR                |
| >1827 | >comp1024_c0_seq1_4 | WWGGEPIWVTTRK               |
| >1828 | >MMa17865           | KSELWNYNTNK                 |
| >1829 | >MMa17865           | VWCVINNESCNSECK             |
| >1830 | >MMa42691           | AMEDGIVYSGK                 |
| >1831 | >MMa42691           | APSTDDYLLYCQFSDKDSK         |
| >1832 | >MMa42691           | CSEEYPGLCK                  |
| >1833 | >MMa42691           | DASPQYFEFK                  |
| >1834 | >MMa42691           | DASPQYFEFKEYGVR             |
| >1835 | >MMa42691           | IGCGVAGYTEANTK              |

---

|       |                     |                                  |
|-------|---------------------|----------------------------------|
| >1836 | >MMa42691           | IGCGVAGYTEANTKK                  |
| >1837 | >MMa42691           | KDASPQYFEFK                      |
|       |                     | KVLYTCNYGPAGNMIGSEAYQVGSPCSACPEN |
| >1838 | >MMa42691           | TK                               |
| >1839 | >MMa42691           | LSKDHTFCMASTCK                   |
| >1840 | >MMa42691           | NGICAYLIGR                       |
| >1841 | >MMa42691           | TSSSWNTIGILMK                    |
| >1842 | >MMa42691           | VIAGGSVSDSDKETILK                |
|       |                     | VLYTCNYGPAGNMIGSEAYQVGSPCSACPENT |
| >1843 | >MMa42691           | K                                |
| >1844 | >MMa31930           | EYQPSQVIVASVQITANHK              |
| >1845 | >MMa05656           | VQTIMDSLGLK                      |
| >1846 | >MMa17864           | SELWAYETNK                       |
| >1847 | >MMa42689           | CSEEYPGLCK                       |
| >1848 | >MMa42689           | NGICAYLIGR                       |
| >1849 | >MMa55199           | IGGIGTVPVGR                      |
| >1850 | >comp545_c0_seq1_1  | ESYLCTSFK                        |
| >1851 | >comp545_c0_seq1_1  | FNMLMPDVQPLQK                    |
| >1852 | >comp545_c0_seq1_1  | IEQPVTLHPFAFR                    |
| >1853 | >comp1072_c0_seq1_4 | ITELKDSLQELR                     |
| >1854 | >comp1072_c0_seq1_4 | LGISSNLFNK                       |
| >1855 | >comp1072_c0_seq1_4 | LGISSNLFNKLDVGK                  |
| >1856 | >comp1072_c0_seq1_4 | LIELAEISR                        |
| >1857 | >comp1072_c0_seq1_4 | MLTMIYNDLK                       |
| >1858 | >comp1072_c0_seq1_4 | TLTNELTGLK                       |
| >1859 | >MMa35583           | LGISSDLFNKLDVGK                  |
| >1860 | >MMa35583           | LIELAEISR                        |
| >1861 | >comp52_c1_seq1_5   | GAPAQYLDVNYVR                    |
| >1862 | >comp52_c1_seq1_5   | KGANVAGSNSNNQFEVQLDR             |
| >1863 | >comp52_c1_seq1_5   | LADQCVFKHDCDECR                  |
| >1864 | >comp52_c1_seq1_5   | SHSISYGLCK                       |
| >1865 | >MMa31039           | ISAGVLSFSYENDCILEK               |
| >1866 | >comp1072_c0_seq4_6 | NFEDINQVQNALR                    |
| >1867 | >comp1172_c0_seq1_1 | CPANTGPCDCFHVSSR                 |
| >1868 | >comp1172_c0_seq1_1 | ELSLAYNPLK                       |
| >1869 | >comp1172_c0_seq1_1 | IPINALISLER                      |
| >1870 | >comp1172_c0_seq1_1 | LCLYDLTIISGK                     |
| >1871 | >comp1172_c0_seq1_1 | MEKIPINALISLER                   |
| >1872 | >comp1172_c0_seq1_1 | MNLNLPLLNIPLSLFSNQK              |
| >1873 | >comp1172_c0_seq1_1 | MYKDFEDLSNLK                     |
| >1874 | >comp1172_c0_seq1_1 | NELSSIAYGLEDLNNLEK               |
| >1875 | >comp1172_c0_seq1_1 | NFKNIIQVQQALR                    |

---

|       |                       |                      |
|-------|-----------------------|----------------------|
| >1876 | >comp1172_c0_seq1_1   | NQIDSIDDSLYGLTK      |
| >1877 | >comp1172_c0_seq1_1   | NVENIIIGEDNYVINK     |
| >1878 | >comp105006_c0_seq1_4 | LATVISPR             |
| >1879 | >comp197_c0_seq1_4    | DVIAPVASTVIQNVNR     |
| >1880 | >comp197_c0_seq1_4    | HPDWSPAQIEK          |
| >1881 | >comp197_c0_seq1_4    | ILVNEEETFNGDK        |
| >1882 | >comp197_c0_seq1_4    | IVIFYESQLGK          |
| >1883 | >comp197_c0_seq1_4    | LSHPNTLIYPYINYILPGTK |
| >1884 | >comp197_c0_seq1_4    | TVPSMDFKR            |
| >1885 | >comp197_c0_seq1_4    | TYVKDVIAPVASTVIQNVNR |
| >1886 | >comp197_c0_seq1_4    | VAIEEWENSAK          |
| >1887 | >comp197_c0_seq1_4    | VAIEEWENSAKEWMLK     |
| >1888 | >comp1072_c0_seq2_4   | CPAYTGPCDCVFSR       |
| >1889 | >comp1024_c0_seq1_4   | FGPLSQAVGK           |
| >1890 | >comp1024_c0_seq1_4   | IMPLIAVADPGYLIAR     |
| >1891 | >comp1024_c0_seq1_4   | LLETFLDDR            |
| >1892 | >comp1024_c0_seq1_4   | MVETIDKLVGFLLEK      |
| >1893 | >comp1024_c0_seq1_4   | RIMPLIAVADPGYLIAR    |
| >1894 | >comp1024_c0_seq1_4   | VLLISFDGFR           |
| >1895 | >comp1024_c0_seq1_4   | WMPLSGPVAGILPYEGK    |
| >1896 | >comp1024_c0_seq1_4   | WMPLSGPVAGILPYEGKR   |
| >1897 | >comp1024_c0_seq1_4   | WWGGEPIWVTTR         |
| >1898 | >MMa42691             | APSTDDYLLYCQFSDKDSK  |
| >1899 | >MMa42691             | IGCGVAGYTEANTKK      |
| >1900 | >comp31795_c0_seq1_5  | NIIQVKQIVK           |
| >1901 | >MMa31930             | EYQPSQVIVASVQITANHK  |
| >1902 | >comp41_c0_seq1_5     | DVNNLTYLK            |
| >1903 | >MMa48694             | LTEVIADISER          |
| >1904 | >comp1072_c0_seq1_4   | IKTLTNELTGLK         |
| >1905 | >comp1072_c0_seq1_4   | ITELKDSLQELR         |
| >1906 | >comp1072_c0_seq1_4   | LGISSNLFNK           |
| >1907 | >comp1072_c0_seq1_4   | LGISSNLFNKLDVGK      |
| >1908 | >comp1072_c0_seq1_4   | LIELAEISR            |
| >1909 | >comp1072_c0_seq1_4   | MLTMIYNDLK           |
| >1910 | >comp1072_c0_seq1_4   | TLTNELTGLK           |
| >1911 | >comp1072_c0_seq2_4   | CPAYTGPCDCVFSR       |
| >1912 | >comp1072_c0_seq3_6   | LYLPLHDLPTIFANQGNCLR |
| >1913 | >comp52_c1_seq1_5     | GAPAQYLDVNYVR        |
| >1914 | >comp52_c1_seq1_5     | LADQCVFKHDCDECR      |
| >1915 | >comp52_c1_seq1_5     | SHSISYLGCK           |
| >1916 | >comp52_c1_seq1_5     | YLFNCDFK             |
| >1917 | >MMa31039             | IISNEELNVIAGDVSPGK   |

---

|       |                       |                        |
|-------|-----------------------|------------------------|
| >1918 | >MMa31039             | ISAGVLSFSYENDCILEK     |
| >1919 | >comp1072_c0_seq4_6   | NFEDINQVQNALR          |
| >1920 | >MMa35583             | LGISSDLFNKLDVGK        |
| >1921 | >MMa35583             | LIELAEISR              |
| >1922 | >comp1172_c0_seq1_1   | ELSLAYNPLK             |
| >1923 | >comp1172_c0_seq1_1   | IPINALISLER            |
| >1924 | >comp1172_c0_seq1_1   | LCLYDLTIISGK           |
| >1925 | >comp1172_c0_seq1_1   | MEKIPINALISLER         |
| >1926 | >comp1172_c0_seq1_1   | MNLNLPLLNIPDSLFSNQK    |
| >1927 | >comp1172_c0_seq1_1   | NELSSIAYGLEDLNNLEK     |
| >1928 | >comp1172_c0_seq1_1   | NFKNIIQVQQALR          |
| >1929 | >comp1172_c0_seq1_1   | NQIDSIDDSLYGLTK        |
| >1930 | >comp1172_c0_seq1_1   | NVENIIIGEDNYVINK       |
| >1931 | >comp197_c0_seq1_4    | DVIAPVASTVIQNVNR       |
| >1932 | >comp197_c0_seq1_4    | ILVNQEETFNGDK          |
| >1933 | >comp197_c0_seq1_4    | TYVKDVIAPVASTVIQNVNR   |
| >1934 | >comp197_c0_seq1_4    | VAIEEWENSAK            |
| >1935 | >comp1024_c0_seq1_4   | FGPLSQAVGK             |
| >1936 | >comp1024_c0_seq1_4   | GIQSTFTTK              |
| >1937 | >comp1024_c0_seq1_4   | IMPLIAVADPGYLIAR       |
| >1938 | >comp1024_c0_seq1_4   | VLLISFDGFR             |
| >1939 | >comp1024_c0_seq1_4   | WWGGEPIWVTTR           |
| >1940 | >MMa42691             | DASPQYFEFK             |
| >1941 | >MMa42691             | DASPQYFEFKKEYGVR       |
| >1942 | >MMa42691             | IGCGVAGYTEANTK         |
| >1943 | >MMa42691             | IGCGVAGYTEANTKK        |
| >1944 | >MMa42691             | NGICAYLIGR             |
| >1945 | >MMa42691             | TSSSWNTIGILMK          |
| >1946 | >MMa42691             | VIAGGSVSDSDKETILK      |
| >1947 | >comp163667_c0_seq1_6 | INETFRNVK              |
| >1948 | >MMa42689             | NGICAYLIGR             |
| >1949 | >MMa55199             | IGGIGTVPVGR            |
| >1950 | >MMa55199             | THINIVVIGHVDSGK        |
| >1951 | >comp31795_c0_seq1_5  | NIIQVKQIVK             |
| >1952 | >comp545_c0_seq1_1    | ESYLCTSFK              |
| >1953 | >comp1072_c0_seq1_4   | ITELKDSLQELR           |
| >1954 | >comp1072_c0_seq1_4   | LGISSNLFNK             |
| >1955 | >comp1072_c0_seq1_4   | LGISSNLFNKLDVGK        |
| >1956 | >comp1072_c0_seq1_4   | LIELAEISR              |
| >1957 | >comp1072_c0_seq1_4   | TLTNELTGLK             |
| >1958 | >comp1072_c0_seq2_4   | CPAYTGPCDCVFSR         |
| >1959 | >comp1072_c0_seq3_6   | LYLPLHDL PDTIFANQGNCLR |

---

|       |                       |                        |
|-------|-----------------------|------------------------|
| >1960 | >comp52_c1_seq1_5     | DGFCLTLSFR             |
| >1961 | >comp52_c1_seq1_5     | EGVSKDEQQTILELHNK      |
| >1962 | >comp52_c1_seq1_5     | GANVAGSNSNNQFEVQLDR    |
| >1963 | >comp52_c1_seq1_5     | GAPAQYLDVNYVR          |
| >1964 | >comp52_c1_seq1_5     | KGANVAGSNSNNQFEVQLDR   |
| >1965 | >comp52_c1_seq1_5     | KSHSISYLGLCK           |
| >1966 | >comp52_c1_seq1_5     | LADQCVFKHDCDECR        |
| >1967 | >comp52_c1_seq1_5     | QIISGVYKTVTLNGGETTTLK  |
| >1968 | >comp52_c1_seq1_5     | SHSISYLGLCK            |
| >1969 | >comp52_c1_seq1_5     | TESSSDCQSQVEGANKWQTR   |
| >1970 | >comp52_c1_seq1_5     | TVTLNGGETTTLK          |
| >1971 | >comp52_c1_seq1_5     | VGCGYVSFEK             |
| >1972 | >MMa31039             | IISNEELNVIAGDVSPGK     |
| >1973 | >comp1072_c0_seq4_6   | NFEDINQVQNALR          |
| >1974 | >comp1172_c0_seq1_1   | ELSLAYNPLK             |
| >1975 | >comp1172_c0_seq1_1   | IPINALISLER            |
| >1976 | >comp1172_c0_seq1_1   | LCLYDLTIISGK           |
| >1977 | >comp1172_c0_seq1_1   | LDLSYNSFTK             |
| >1978 | >comp1172_c0_seq1_1   | NFKNIIQVQQALR          |
| >1979 | >comp1172_c0_seq1_1   | NQIDSIDDSLYGLTK        |
| >1980 | >comp1172_c0_seq1_1   | NQIDSIDDSLYGLTKLR      |
| >1981 | >comp1172_c0_seq1_1   | NVENIIIGEDNYVINK       |
| >1982 | >comp105006_c0_seq1_4 | LATVISPR               |
| >1983 | >comp197_c0_seq1_4    | DVIAPVASTVIQNVNR       |
| >1984 | >comp197_c0_seq1_4    | HPDWSPAQIEK            |
| >1985 | >comp197_c0_seq1_4    | ILVNQEETFNGDK          |
| >1986 | >comp197_c0_seq1_4    | IVIFYESQLGK            |
| >1987 | >comp197_c0_seq1_4    | TYVKDVAPVASTVIQNVNR    |
| >1988 | >comp197_c0_seq1_4    | VAIEEWENSAK            |
| >1989 | >comp431_c0_seq1_5    | ILITYPETIAK            |
| >1990 | >comp431_c0_seq1_5    | QLNLDPDNAR             |
| >1991 | >comp804_c0_seq1_5    | VNDELNNLFLR            |
| >1992 | >comp508_c0_seq1_4    | AGVLIGEILK             |
| >1993 | >comp508_c0_seq1_4    | ILTSPPKTDALLYEGAICPEAK |
| >1994 | >comp508_c0_seq1_4    | YSGYLTSNPR             |
| >1995 | >MMa04555             | VAECLFNNYCNNECTK       |
| >1996 | >comp48_c0_seq1_5     | LSTPVTFTPHVNR          |
| >1997 | >comp774_c0_seq1_5    | CHDFENISQVQNALEK       |
| >1998 | >comp774_c0_seq1_5    | FPSVIDMLDIR            |
| >1999 | >comp774_c0_seq1_5    | GGIMEEFPINIFLPLK       |
| >2000 | >comp774_c0_seq1_5    | IHSGILPNTLK            |
| >2001 | >comp774_c0_seq1_5    | LKCHDFENISQVQNALEK     |



---

|       |                       |                           |
|-------|-----------------------|---------------------------|
| >2002 | >comp774_c0_seq1_5    | NIDISKNPLQCTNNVSLVISSLILK |
| >2003 | >comp774_c0_seq1_5    | NPLQCTNNVSLVISSLILK       |
| >2004 | >comp774_c0_seq1_5    | NVQSLNLAGNQLTEIDESFNCLNK  |
| >2005 | >comp774_c0_seq1_5    | TLNDELTGLR                |
| >2006 | >comp105006_c0_seq1_4 | LATVISPR                  |
| >2007 | >MMa04555             | VAECLFNNYCNNECTK          |
| >2008 | >MMa04555             | VYYADKGYCCLLK             |
| >2009 | >MMa02192             | VSCLWGNEGCKNK             |
| >2010 | >MMa02192             | VSCLWGNEGCKNKECR          |
| >2011 | >comp105006_c0_seq1_4 | LATVISPR                  |
| >2012 | >comp20_c0_seq1_3     | YAVPEGTLR                 |
| >2013 | >comp19356_c0_seq1_3  | TITVLSPR                  |
| >2014 | >comp106427_c0_seq1_6 | VATVPSIR                  |
| >2015 | >MMa04555             | VAECLFNNYCNNECTK          |
| >2016 | >MMa04555             | VYYADKGYCCLLK             |
| >2017 | >comp105006_c0_seq1_4 | LATVISPR                  |
| >2018 | >comp151396_c0_seq1_5 | VFWISCIPSANFVLGER         |
| >2019 | >comp10876_c0_seq1_2  | LSSPASIDKK                |
| >2020 | >MMa35530             | LTSMSEYACPVIEK            |
| >2021 | >comp21_c0_seq1_5     | LHLASGGSCQQPAPFVK         |
| >2022 | >MMa02192             | VSCLWGNEGCKNK             |
| >2023 | >MMa04555             | VAECLFNNYCNNECTK          |
| >2024 | >MMa04555             | VYYADKGYCCLLK             |
| >2025 | >comp105006_c0_seq1_4 | LATVISPR                  |
| >2026 | >MMa35530             | LTSMSEYACPVIEK            |
| >2027 | >MMa13616             | LPDSVPIR                  |
| >2028 | >comp2261_c0_seq1_6   | IGISSIPR                  |
| >2029 | >MMa04555             | VAECLFNNYCNNECTK          |
| >2030 | >MMa04555             | VYYADKGYCCLLK             |
| >2031 | >MMa02192             | VSCLWGNEGCKNK             |
| >2032 | >MMa02192             | VSCLWGNEGCKNKECR          |
| >2033 | >comp105006_c0_seq1_4 | LATVISPR                  |
| >2034 | >MMa20191             | YGNACWCIDLDPDKVPIR        |
| >2035 | >MMa02192             | VSCLWGNEGCKNK             |
| >2036 | >MMa02192             | VSCLWGNEGCKNKECR          |
| >2037 | >MMa04555             | VAECLFNNYCNNECTK          |
| >2038 | >MMa04555             | VYYADKGYCCLLK             |
| >2039 | >comp514_c1_seq77_5   | CVLSLGNFLISK              |
| >2040 | >comp105006_c0_seq1_4 | LATVISPR                  |
| >2041 | >comp201_c0_seq1_3    | DGYCVGDASICFCK            |
| >2042 | >comp201_c0_seq1_3    | IEDGYYSLENGVFTCK          |
| >2043 | >comp20_c0_seq1_3     | YAVPEGTLR                 |

---

|       |                       |                      |
|-------|-----------------------|----------------------|
| >2044 | >MMa15121             | SFDYALTCSR           |
| >2045 | >MMa15121             | VMDDFVDLSCNK         |
| >2046 | >MMa15121             | YSDCLTTNIDVK         |
| >2047 | >comp16_c0_seq1_5     | YYCTILGENEYCR        |
| >2048 | >comp53_c0_seq1_4     | CNSWNDNLITK          |
| >2049 | >comp53_c0_seq1_4     | ISCIPSEHDDLCDQFCK    |
| >2050 | >comp53_c0_seq1_4     | ISCIPSEHDDLCDQFCKK   |
| >2051 | >comp21_c0_seq1_5     | LHLASGGSCQQPAPFVK    |
| >2052 | >comp105006_c0_seq1_4 | LATVISPR             |
| >2053 | >MMa04555             | VAECLFNNYCNNECTK     |
| >2054 | >MMa02192             | VSCLWGNEGCNK         |
| >2055 | >MMa02192             | VSCLWGNEGCNKECR      |
| >2056 | >MMa04555             | VAECLFNNYCNNECTK     |
| >2057 | >comp201_c0_seq1_3    | DGYCVGDASICFCK       |
| >2058 | >comp105006_c0_seq1_4 | LATVISPR             |
| >2059 | >MMa13619             | LCTDNGAESGYCQWGGR    |
| >2060 | >comp21_c0_seq1_5     | LHLASGGSCQQPAPFVK    |
| >2061 | >comp144019_c0_seq1_5 | NSSPGDKITK           |
| >2062 | >comp105849_c0_seq1_6 | GLFIIDDKGILR         |
| >2063 | >comp16_c0_seq1_5     | LHGVTYGYCYNSR        |
| >2064 | >comp16_c0_seq1_5     | YYCTILGENEYCR        |
| >2065 | >comp16_c0_seq1_5     | YYCTILGENEYCRK       |
| >2066 | >comp20_c0_seq1_3     | YAVPEGTLR            |
| >2067 | >MMa17865             | VWCVINNESCNSECK      |
| >2068 | >MMa17864             | SELWAYETNK           |
| >2069 | >comp58234_c0_seq1_4  | IVLSAGTIINMR         |
| >2070 | >MMa15121             | AKYSDCLTTNIDVK       |
| >2071 | >MMa15121             | EYKSFDYALTCSR        |
| >2072 | >MMa15121             | NAVSEFQLHEILK        |
| >2073 | >MMa15121             | NAVSEFQLHEILKK       |
| >2074 | >MMa15121             | SFDYALTCSR           |
| >2075 | >MMa15121             | VMDDFVDLSCNK         |
| >2076 | >MMa15121             | VMDDFVDLSCNKLHPSSDEK |
| >2077 | >MMa15121             | YSDCLTTNIDVK         |
| >2078 | >comp129172_c0_seq1_4 | FQIYSKICLNK          |
| >2079 | >comp16_c0_seq1_5     | LEDKDVTIWNAVK        |
| >2080 | >comp16_c0_seq1_5     | LHGVTYGYCYNSR        |
| >2081 | >comp16_c0_seq1_5     | YYCTILGENEYCR        |
| >2082 | >comp16_c0_seq1_5     | YYCTILGENEYCRK       |
| >2083 | >comp20_c0_seq1_3     | YAVPEGTLR            |
| >2084 | >comp105006_c0_seq1_4 | LATVISPR             |
| >2085 | >MMa15121             | VMDDFVDLSCNK         |

---

|       |                       |                        |
|-------|-----------------------|------------------------|
| >2086 | >MMa15121             | YSDCLTTNIDVK           |
| >2087 | >MMa17865             | VWCVINNESCNSECK        |
| >2088 | >MMa17864             | IWCVINNESCNSECK        |
| >2089 | >MMa17864             | SELWAYETNK             |
| >2090 | >comp106427_c0_seq1_6 | VATVPSIR               |
| >2091 | >comp20_c0_seq1_3     | YAVPEGTLR              |
| >2092 | >comp16_c0_seq1_5     | YYCTILGENEYCR          |
| >2093 | >comp16_c0_seq1_5     | YYCTILGENEYCRK         |
| >2094 | >comp21_c0_seq1_5     | LHLASGGSCQQPAPFVK      |
| >2095 | >comp105006_c0_seq1_4 | LATVISPR               |
| >2096 | >MMa02192             | VSCLWGNEGCNKECR        |
| >2097 | >MMa13616             | LPDSVPIR               |
| >2098 | >MMa17864             | SELWAYETNK             |
| >2099 | >MMa20191             | YGNACWCIDLDPKVPIR      |
| >2100 | >comp105006_c0_seq1_4 | LATVISPR               |
| >2101 | >MMa13619             | LCTDNGAESGYCQWGGR      |
| >2102 | >MMa02192             | VSCLWGNEGCNK           |
| >2103 | >MMa02192             | VSCLWGNEGCNKECR        |
| >2104 | >MMa13616             | LCTENGAESGYCQWGGR      |
| >2105 | >MMa13616             | LPDSVPIR               |
| >2106 | >MMa17864             | IWCVINNESCNSECK        |
| >2107 | >comp7_c0_seq4_4      | LCTDNGAESGYCQWGGR      |
| >2108 | >comp105006_c0_seq1_4 | LATVISPR               |
| >2109 | >comp2175_c0_seq2_3   | DVLSIPSSEK             |
| >2110 | >MMa13619             | LCTDNGAESGYCQWGGR      |
| >2111 | >MMa02192             | VSCLWGNEGCNK           |
| >2112 | >MMa02192             | VSCLWGNEGCNKECR        |
| >2113 | >MMa13616             | DAYIAKPENCVYECGITQDCNK |
| >2114 | >MMa13616             | LPDSVPIR               |
| >2115 | >MMa13616             | YGNACWCIK              |
| >2116 | >MMa20191             | YGNACWCIDLDPKVPIR      |
| >2117 | >MMa17864             | IWCVINNESCNSECK        |
| >2118 | >comp7_c0_seq4_4      | DAYIAKPENCVYHCATNEGCNK |
| >2119 | >comp7_c0_seq4_4      | YGNACWCIK              |
| >2120 | >comp514_c1_seq77_5   | CVLSLGNFLISK           |
| >2121 | >comp105006_c0_seq1_4 | LATVISPR               |
| >2122 | >MMa34629             | LPDKVPIR               |
| >2123 | >comp34_c2_seq1_2     | LACWCDDIHNWVPTWSR      |
| >2124 | >MMa13619             | DAYIAKPENCVYHCATNEGCNK |
| >2125 | >MMa13619             | LCTDNGAESGYCQWGGR      |
| >2126 | >MMa13619             | YGNACWCIK              |
| >2127 | >MMa02192             | GSNGCKVSCLWGNEGCNK     |

---

|       |                       |                       |
|-------|-----------------------|-----------------------|
| >2128 | >MMa02192             | VSCLWGNEGCK           |
| >2129 | >MMa02192             | VSCLWGNEGCKEKR        |
| >2130 | >MMa13616             | DAYIAKPENCVEGQITQDCNK |
| >2131 | >MMa13616             | LPDSVPIR              |
| >2132 | >MMa13616             | LPDSVPIRVPK           |
| >2133 | >MMa17864             | IWCVINNESCK           |
| >2134 | >MMa17864             | SELWAYETNK            |
| >2135 | >MMa55372             | YGNACWCYKLPDDAR       |
| >2136 | >comp7_c0_seq4_4      | DAYIAKPENCVEHCATNEGCK |
| >2137 | >MMa35530             | LTSMEYACPVIEK         |
| >2138 | >comp105006_c0_seq1_4 | LATVISPR              |
| >2139 | >MMa34629             | LPDKVPIR              |
| >2140 | >MMa13619             | DAYIAKPENCVEHCATNEGCK |
| >2141 | >MMa13619             | LCTDNGAESGYCQWGGR     |
| >2142 | >MMa02192             | VSCLWGNEGCK           |
| >2143 | >MMa02192             | VSCLWGNEGCKEKR        |
| >2144 | >MMa13616             | LCTDNGAESGYCQWGGR     |
| >2145 | >MMa13616             | LPDSVPIR              |
| >2146 | >comp106427_c0_seq1_6 | VATVPSIR              |
| >2147 | >comp7_c0_seq4_4      | LCTDNGAESGYCQWGGR     |
| >2148 | >comp173778_c0_seq1_6 | ISCLWFQTRIGG          |
| >2149 | >comp10876_c0_seq1_2  | LSSPASIDKK            |
| >2150 | >comp514_c1_seq77_5   | CVLSLGNFLISK          |
| >2151 | >MMa20191             | YGNACWCIDLDPK         |
| >2152 | >MMa55199             | THINIVVIGHVDSGK       |
| >2153 | >comp21_c0_seq1_5     | LHLASGGSCQPAPFVK      |
| >2154 | >comp105006_c0_seq1_4 | LATVISPR              |
| >2155 | >comp140369_c0_seq1_5 | VRSSPSVK              |
| >2156 | >MMa04555             | VAECLFNNYCNNECTK      |
| >2157 | >MMa13619             | LCTDNGAESGYCQWGGR     |
| >2158 | >MMa02192             | VSCLWGNEGCK           |
| >2159 | >MMa02192             | VSCLWGNEGCKEKR        |
| >2160 | >MMa02192             | VSCLWGNEGCK           |
| >2161 | >MMa02192             | VSCLWGNEGCKEKR        |
| >2162 | >MMa20191             | YGNACWCIDLDPKVPIR     |
| >2163 | >MMa04555             | VYYADKGYCCLLK         |
| >2164 | >comp105006_c0_seq1_4 | LATVISPR              |
| >2165 | >MMa55199             | THINIVVIGHVDSGK       |
| >2166 | >MMa13616             | LPDSVPIR              |
| >2167 | >MMa04555             | VAECLFNNYCNNECTK      |
| >2168 | >MMa04555             | VYYADKGYCCLLK         |
| >2169 | >MMa55199             | THINIVVIGHVDSGK       |

---

|       |                       |                        |
|-------|-----------------------|------------------------|
| >2170 | >comp514_c1_seq77_5   | CVLSLGNFLISK           |
| >2171 | >MMa20191             | YGNACWCIDLDPDKVPIR     |
| >2172 | >comp48577_c0_seq2_3  | NITFMNGSVIGFK          |
| >2173 | >comp105006_c0_seq1_4 | LATVISPR               |
| >2174 | >comp34_c2_seq1_2     | LACWCDDIHNWVPTWSR      |
| >2175 | >MMa02192             | VSCLWGNEGCKNK          |
| >2176 | >MMa02192             | VSCLWGNEGCKNKECR       |
| >2177 | >MMa20191             | YGNACWCIDLDPDKVPIR     |
| >2178 | >MMa02192             | VSCLWGNEGCKNK          |
| >2179 | >MMa02192             | VSCLWGNEGCKNKECR       |
| >2180 | >comp97316_c0_seq1_5  | MIILGDIE               |
| >2181 | >comp105006_c0_seq1_4 | LATVISPR               |
| >2182 | >comp33184_c0_seq4_1  | IMGDIINK               |
| >2183 | >MMa20191             | YGNACWCIDLDPDKVPIR     |
| >2184 | >MMa02192             | VSCLWGNEGCKNK          |
| >2185 | >MMa02192             | VSCLWGNEGCKNKECR       |
| >2186 | >comp105006_c0_seq1_4 | LATVISPR               |
| >2187 | >MMa13616             | LPDSVPIR               |
| >2188 | >MMa20191             | YGNACWCIDLDPDKVPIR     |
| >2189 | >MMa02192             | VSCLWGNEGCKNKECR       |
| >2190 | >comp105006_c0_seq1_4 | LATVISPR               |
| >2191 | >MMa20191             | YGNACWCIDLDPDKVPIR     |
| >2192 | >MMa02192             | VSCLWGNEGCKNK          |
| >2193 | >MMa02192             | VSCLWGNEGCKNKECR       |
| >2194 | >MMa13616             | DAYIAKPENCVYECGITQDCNK |
| >2195 | >MMa17865             | GGYYGYCYFWK            |
| >2196 | >MMa17865             | KSELWNYNTNK            |
| >2197 | >MMa17865             | VWCVINNESCNSECKIR      |
| >2198 | >MMa17864             | IWCVINNESCNSECK        |
| >2199 | >MMa17864             | IWCVINNESCNSECKLR      |
| >2200 | >MMa55372             | AESGYCQWASK            |
| >2201 | >MMa55372             | YGNACWCYKLPDDAR        |
| >2202 | >MMa35530             | LISMSEYACPVIEK         |
| >2203 | >MMa20191             | YGNACWCIDLDPDKVPIR     |
| >2204 | >comp105006_c0_seq1_4 | LATVISPR               |
| >2205 | >MMa34629             | DGYIADDDKNCA YFCGR     |
| >2206 | >MMa34629             | LPDKVPIR               |
| >2207 | >MMa13619             | LCTDNGAESGYCQWGGR      |
| >2208 | >MMa02192             | VSCLWGNEGCKNK          |
| >2209 | >MMa02192             | VSCLWGNEGCKNKECR       |
| >2210 | >comp6939_c0_seq1_1   | TCLLGGGSR              |
| >2211 | >MMa02192             | VSCLWGNEGCKNKECR       |

---

|       |                       |                        |
|-------|-----------------------|------------------------|
| >2212 | >comp33184_c0_seq4_1  | IMGDIINK               |
| >2213 | >MMa02192             | VSCLWGNEGCNK           |
| >2214 | >MMa02192             | VSCLWGNEGCNKECR        |
| >2215 | >comp105006_c0_seq1_4 | LATVISPR               |
| >2216 | >MMa34629             | LPDKVPIR               |
| >2217 | >MMa35530             | LTSMSEYACPVIEK         |
| >2218 | >MMa13616             | LPDSVPIR               |
| >2219 | >comp141_c0_seq1_4    | GFLLGFCQDR             |
| >2220 | >MMa02192             | VSCLWGNEGCNK           |
| >2221 | >MMa02192             | VSCLWGNEGCNKECR        |
| >2222 | >comp20_c0_seq1_3     | YAVPEGLR               |
| >2223 | >MMa20191             | YGNACWCIDLDPDKVPIR     |
| >2224 | >MMa17864             | SELWAYETNK             |
| >2225 | >comp7_c0_seq5_6      | NEYCNDLCTK             |
| >2226 | >comp105006_c0_seq1_4 | LATVISPR               |
| >2227 | >MMa34629             | LPDKVPIR               |
| >2228 | >MMa13619             | LCTDNGAESGYCQWGGR      |
| >2229 | >MMa13616             | DAYIAKPENCVYECGITQDCNK |
| >2230 | >MMa13616             | LCTENGAESGYCQWGGR      |
| >2231 | >comp404_c0_seq1_2    | TCESFIYGGVGGNK         |
| >2232 | >comp105006_c0_seq1_4 | LATVISPR               |
| >2233 | >comp7_c0_seq4_4      | LCTDNGAESGYCQWGGR      |
| >2234 | >MMa02192             | VSCLWGNEGCNK           |
| >2235 | >MMa02192             | VSCLWGNEGCNKECR        |
| >2236 | >MMa55372             | YGNACWCYK              |
| >2237 | >MMa55372             | YGNACWCYKLPDDR         |
| >2238 | >comp20_c0_seq1_3     | YAVPEGLR               |
| >2239 | >MMa20191             | YGNACWCIDLDPDK         |
| >2240 | >MMa20191             | YGNACWCIDLDPDKVPIR     |
| >2241 | >MMa17864             | IWCVINNESCENSECK       |
| >2242 | >MMa34629             | LPDKVPIR               |
| >2243 | >comp141_c0_seq1_4    | GFLLGFCQDR             |
| >2244 | >MMa35530             | LTSMSEYACPVIEK         |
| >2245 | >MMa13619             | LCTDNGAESGYCQWGGR      |
| >2246 | >MMa13616             | DAYIAKPENCVYECGITQDCNK |
| >2247 | >MMa13616             | LCTENGAESGYCQWGGR      |
| >2248 | >comp141_c0_seq1_4    | GFLLGFCQDR             |
| >2249 | >MMa17864             | GNYGICYFWK             |
| >2250 | >MMa17864             | IWCVINNESCENSECK       |
| >2251 | >comp111960_c0_seq1_5 | MALFLEYIR              |
| >2252 | >MMa55372             | YGNACWCYK              |
| >2253 | >MMa55372             | YGNACWCYKLPDDR         |

---

|       |                       |                     |
|-------|-----------------------|---------------------|
| >2254 | >comp7_c0_seq4_4      | LCTDNGAESGYCQWGGK   |
| >2255 | >MMa35530             | LTSMSEYACPVIEK      |
| >2256 | >comp45246_c0_seq1_4  | VASISPLR            |
| >2257 | >MMa20191             | YGNACWCIDLDPDK      |
| >2258 | >MMa20191             | YGNACWCIDLDPDKVPIR  |
| >2259 | >comp105006_c0_seq1_4 | LATVISPR            |
| >2260 | >comp404_c0_seq1_2    | TCESFIYGGVGGNK      |
| >2261 | >MMa34629             | LPDKVPIR            |
| >2262 | >comp1465_c0_seq1_3   | KGCSIINK            |
| >2263 | >MMa13619             | LCTDNGAESGYCQWGGGR  |
| >2264 | >MMa02192             | VSCLWGNEGCNK        |
| >2265 | >MMa02192             | VSCLWGNEGCNKECR     |
| >2266 | >MMa12627             | DLPDNVPIR           |
| >2267 | >MMa12627             | DLPDNVPIRVPGK       |
| >2268 | >comp38_c0_seq1_5     | VSECLLNNYCNNICTK    |
| >2269 | >comp105006_c0_seq1_4 | LATVISPR            |
| >2270 | >comp34_c1_seq4_6     | YGNACWCINLPDDKPIR   |
| >2271 | >comp7_c0_seq5_6      | DAYIAKPHNCVYECAR    |
| >2272 | >comp7_c0_seq5_6      | IGYCNIQGK           |
| >2273 | >comp3855_c0_seq4_5   | MIQVSYTR            |
| >2274 | >MMa02192             | VSCLWGNEGCNKECR     |
| >2275 | >comp11842_c0_seq20_3 | GGLKDVMR            |
| >2276 | >MMa20191             | YGNACWCIDLDPDKVPIR  |
| >2277 | >MMa02192             | VSCLWGNEGCNK        |
| >2278 | >MMa37864             | HLGGWSGYCYAFNCK     |
| >2279 | >comp16_c0_seq1_5     | LEDKDVTIWNAVK       |
| >2280 | >comp16_c0_seq1_5     | LHGVTYGYCYNRSR      |
| >2281 | >comp16_c0_seq1_5     | YYCTILGENEYCRK      |
| >2282 | >comp20_c0_seq1_3     | YAVPEGTLR           |
| >2283 | >comp45246_c0_seq1_4  | VASISPLR            |
| >2284 | >MMa17865             | SELWNYNTNK          |
| >2285 | >comp105006_c0_seq1_4 | LATVISPR            |
| >2286 | >comp20115_c0_seq1_6  | NDYLLQSTKHK         |
| >2287 | >comp10876_c0_seq1_2  | LSSPASIDKK          |
| >2288 | >comp106427_c0_seq1_6 | VATVPSIR            |
| >2289 | >comp20_c0_seq1_3     | YAVPEGTLR           |
| >2290 | >comp26_c0_seq1_5     | LCPSSTAICHR         |
| >2291 | >comp105006_c0_seq1_4 | LATVISPR            |
| >2292 | >MMa28760             | YSFTYALVR           |
| >2293 | >MMa35530             | LTSMSEYACPVIEK      |
| >2294 | >MMa35530             | HSWNKLTSMSEYACPVIEK |
| >2295 | >MMa35530             | LTSMSEYACPVIEK      |

---

|       |                       |                       |
|-------|-----------------------|-----------------------|
| >2296 | >MMa17865             | KSELWNYNTNK           |
| >2297 | >MMa17865             | VWCVINNESCNSECKIR     |
| >2298 | >comp105006_c0_seq1_4 | LATVISPR              |
| >2299 | >comp20_c0_seq1_3     | TQFGCPAYQGYCDDHCQDIKK |
| >2300 | >comp20_c0_seq1_3     | YAVPEGTLR             |
| >2301 | >comp105006_c0_seq1_4 | LATVISPR              |
| >2302 | >comp20_c0_seq1_3     | YAVPEGTLR             |
| >2303 | >comp26_c0_seq1_5     | LCPSSTAICHR           |
| >2304 | >comp5130_c0_seq2_3   | TPSVSLPR              |
| >2305 | >comp105006_c0_seq1_4 | LATVISPR              |
| >2306 | >comp156076_c0_seq1_3 | EDTTEVCRR             |
| >2307 | >MMa29185             | IYCSLTNMK             |
| >2308 | >MMa29185             | TLDEMTDFYCNK          |
| >2309 | >comp404_c0_seq1_2    | TCESFIYGGVGGNK        |
| >2310 | >MMa20191             | YGNACWCIDLDPKVPIR     |
| >2311 | >comp20_c0_seq1_3     | YAVPEGTLR             |
| >2312 | >MMa17865             | GGYYGYCYFWK           |
| >2313 | >MMa17865             | KSELWNYNTNK           |
| >2314 | >MMa17865             | VWCVINNESCNSECK       |
| >2315 | >MMa17864             | IWCVINNESCNSECK       |
| >2316 | >comp105006_c0_seq1_4 | LATVISPR              |
| >2317 | >comp105006_c0_seq1_4 | LATVISPR              |
| >2318 | >comp66_c0_seq1_4     | LATKIIPSLFR           |
| >2319 | >comp105006_c0_seq1_4 | LATVISPR              |
| >2320 | >comp105006_c0_seq1_4 | LATVISPR              |
| >2321 | >comp106427_c0_seq1_6 | VATVPSIR              |
| >2322 | >comp20_c0_seq1_3     | THQTAVHKLK            |
| >2323 | >comp20_c0_seq1_3     | YAVPEGTLR             |
| >2324 | >comp11643_c0_seq1_1  | GNRGSLPR              |
| >2325 | >comp20_c0_seq1_3     | YAVPEGTLR             |
| >2326 | >MMa17865             | GGYYGYCYFWK           |
| >2327 | >MMa17864             | SELWAYETNK            |
| >2328 | >MMa35530             | LISMSEYACPVIEK        |
| >2329 | >comp20_c0_seq1_3     | YAVPEGTLR             |
| >2330 | >comp404_c0_seq1_2    | NNFLNIENCCK           |
| >2331 | >comp404_c0_seq1_2    | TCESFIYGGVGGNK        |
| >2332 | >MMa34629             | LPDKVPIR              |
| >2333 | >MMa17865             | GGYYGYCYFWK           |
| >2334 | >MMa17865             | KSELWNYNTNK           |
| >2335 | >MMa17865             | SELWNYNTNK            |
| >2336 | >MMa17865             | VWCVINNESCNSECK       |
| >2337 | >MMa17865             | VWCVINNESCNSECKIR     |



---

|       |                       |                           |
|-------|-----------------------|---------------------------|
| >2338 | >MMa17864             | IWCVINNESCNSECK           |
| >2339 | >MMa55372             | YGNACWCYKLPDDAR           |
| >2340 | >comp23761_c0_seq3_4  | LPSDVQVGSMTK              |
| >2341 | >MMa35530             | LTSMSEYACPVIEK            |
| >2342 | >comp20_c0_seq1_3     | YAVPEGTLR                 |
| >2343 | >comp84321_c0_seq1_1  | RGGSVFIR                  |
| >2344 | >comp5568_c0_seq1_6   | KCSDGALNISNR              |
| >2345 | >comp105006_c0_seq1_4 | LATVISPR                  |
| >2346 | >comp404_c0_seq1_2    | DCSLPVDTGR                |
| >2347 | >comp404_c0_seq1_2    | NNFLNIENCCK               |
| >2348 | >comp404_c0_seq1_2    | NSKTCEFIYGGVGGNK          |
| >2349 | >comp404_c0_seq1_2    | TCESFIYGGVGGNK            |
| >2350 | >comp404_c0_seq1_2    | TCESFIYGGVGGNKNNFLNIENCCK |
| >2351 | >MMa04555             | VAECLFNNYCNNECTK          |
| >2352 | >MMa02192             | VSCLWGNEGCNK              |
| >2353 | >MMa17865             | GGYYGYCYFWK               |
| >2354 | >MMa17865             | KSELWNYNTNK               |
| >2355 | >MMa17865             | SELWNYNTNK                |
| >2356 | >MMa17865             | VWCVINNESCNSECK           |
| >2357 | >MMa17865             | VWCVINNESCNSECKIR         |
| >2358 | >MMa17864             | IWCVINNESCNSECK           |
| >2359 | >MMa17864             | IWCVINNESCNSECKLR         |
| >2360 | >MMa55372             | YGNACWCYKLPDDAR           |
| >2361 | >MMa35530             | HSWNKLTSMSEYACPVIEK       |
| >2362 | >MMa35530             | LTSMSEYACPVIEK            |
| >2363 | >comp20_c0_seq1_3     | TIIQTAVHKLK               |
| >2364 | >comp162_c0_seq1_6    | HGYCMNYDCFCTALRDEIK       |
| >2365 | >comp105006_c0_seq1_4 | LATVISPR                  |
| >2366 | >comp404_c0_seq1_2    | DCSLPVDTGR                |
| >2367 | >comp404_c0_seq1_2    | NNFLNIENCCK               |
| >2368 | >comp404_c0_seq1_2    | NSKTCEFIYGGVGGNK          |
| >2369 | >comp404_c0_seq1_2    | TCESFIYGGVGGNK            |
| >2370 | >comp404_c0_seq1_2    | TCESFIYGGVGGNKNNFLNIENCCK |
| >2371 | >MMa12627             | DLPDNVPIRVPGK             |
| >2372 | >comp38_c0_seq1_5     | VSECLLNNYCNNICTK          |
| >2373 | >comp105006_c0_seq1_4 | LATVISPR                  |
| >2374 | >comp810_c0_seq1_5    | NLKMMVVLIMVIK             |
| >2375 | >comp74_c0_seq1_1     | DAYCNELCTK                |
| >2376 | >MMa12627             | DAYCNELCTK                |
| >2377 | >MMa12627             | DLPDNVPIRVPGK             |
| >2378 | >comp38_c0_seq1_5     | VSECLLNNYCNNICTK          |
| >2379 | >comp105006_c0_seq1_4 | LATVISPR                  |

---

|       |                       |                           |
|-------|-----------------------|---------------------------|
| >2380 | >MMa20191             | YGNACWCIDLDPDK            |
| >2381 | >MMa20191             | YGNACWCIDLDPDKVPIR        |
| >2382 | >comp38_c0_seq1_5     | VSECLLNNYCNNICTK          |
| >2383 | >comp105006_c0_seq1_4 | LATVISPR                  |
| >2384 | >comp105006_c0_seq1_4 | LATVISPR                  |
| >2385 | >MMa17865             | GGYYGYCYFWK               |
| >2386 | >MMa17865             | KSELWNYNTNK               |
| >2387 | >MMa17865             | LACFCQGAR                 |
| >2388 | >MMa17865             | SELWNYNTNK                |
| >2389 | >MMa17865             | VWCVINNECNSECK            |
| >2390 | >MMa17865             | VWCVINNECNSECKIR          |
| >2391 | >MMa17865             | YTGCKVWCVINNECNSECK       |
| >2392 | >MMa17864             | IWCVINNECNSECK            |
| >2393 | >MMa17864             | IWCVINNECNSECKLR          |
| >2394 | >MMa17864             | SELWAYETNK                |
| >2395 | >MMa17864             | YTGCKIWCVINNECNSECK       |
| >2396 | >MMa55372             | AESGYCQWASK               |
| >2397 | >MMa55372             | YGNACWCYKLPDDAR           |
| >2398 | >MMa04555             | VAECLFNNYCNNECTK          |
| >2399 | >MMa35530             | HSWNKLTSMSEYACPVIEK       |
| >2400 | >MMa35530             | LTSMSEYACPVIEK            |
| >2401 | >MMa20191             | YGNACWCIDLDPDKVPIR        |
| >2402 | >comp20_c0_seq1_3     | YAVPEGTLR                 |
| >2403 | >comp162_c0_seq1_6    | HGYCMNYDCFCTALRDEIK       |
| >2404 | >comp105006_c0_seq1_4 | LATVISPR                  |
| >2405 | >comp404_c0_seq1_2    | DCSLPVDTGR                |
| >2406 | >comp404_c0_seq1_2    | NNFLNIENCCK               |
| >2407 | >comp404_c0_seq1_2    | TCESFIYGGVGGNK            |
| >2408 | >comp404_c0_seq1_2    | TCESFIYGGVGGNKNNFLNIENCCK |
| >2409 | >MMa13619             | LCTDNGAESGYCQWGGR         |
| >2410 | >MMa17865             | GGYYGYCYFWK               |
| >2411 | >MMa17865             | KSELWNYNTNK               |
| >2412 | >MMa17865             | LACFCQGAR                 |
| >2413 | >MMa17865             | SELWNYNTNK                |
| >2414 | >MMa17865             | VWCVINNECNSECK            |
| >2415 | >MMa17865             | VWCVINNECNSECKIR          |
| >2416 | >MMa17865             | YTGCKVWCVINNECNSECK       |
| >2417 | >MMa17864             | GNYGICYFWK                |
| >2418 | >MMa17864             | IWCVINNECNSECK            |
| >2419 | >MMa17864             | IWCVINNECNSECKLR          |
| >2420 | >MMa17864             | SELWAYETNK                |
| >2421 | >MMa17864             | YTGCKIWCVINNECNSECK       |

---

|       |                       |                          |
|-------|-----------------------|--------------------------|
| >2422 | >MMa55372             | AESGYCQWASK              |
| >2423 | >MMa55372             | DGYIADDRNCPYFCGR         |
| >2424 | >MMa55372             | YGNACWCYK                |
| >2425 | >MMa55372             | YGNACWCYKLPDDAR          |
| >2426 | >comp38_c0_seq1_5     | VSECLNNYCNRICTK          |
| >2427 | >MMa35530             | HSWNKLTSMSEYACPVIEK      |
| >2428 | >MMa35530             | LTSMSEYACPVIEK           |
| >2429 | >comp20_c0_seq1_3     | TIIQTAVHKL GK            |
| >2430 | >comp20_c0_seq1_3     | YAVPEGTLR                |
| >2431 | >comp105006_c0_seq1_4 | LATVISPR                 |
| >2432 | >comp404_c0_seq1_2    | DCSLPVDTGR               |
| >2433 | >comp404_c0_seq1_2    | NNFLNIENCK               |
| >2434 | >comp404_c0_seq1_2    | TCESFIYGGVGGNK           |
| >2435 | >MMa34629             | DGYIADDDKNCA YFCGR       |
| >2436 | >comp18681_c0_seq4_5  | VPLCNKVILLR              |
| >2437 | >MMa13619             | LCTDNGAESGYCQWGGR        |
| >2438 | >MMa02192             | VSCLWGNEGCNK             |
| >2439 | >MMa17865             | GGYYGYCYFWK              |
| >2440 | >MMa17865             | KSELWNYNTNK              |
| >2441 | >MMa17865             | LACFCQGAR                |
| >2442 | >MMa17865             | VWCVINNESCNSECK          |
| >2443 | >MMa17865             | VWCVINNESCNSECKIR        |
| >2444 | >MMa17865             | YTGCKVWCVINNESCNSECK     |
| >2445 | >MMa17864             | IWCVINNESCNSECK          |
| >2446 | >MMa17864             | IWCVINNESCNSECKLR        |
| >2447 | >MMa17864             | LACYCEGAPKSELWAYETNK     |
| >2448 | >MMa17864             | SELWAYETNK               |
| >2449 | >MMa55372             | YGNACWCYK                |
| >2450 | >MMa55372             | YGNACWCYKLPDDAR          |
| >2451 | >MMa35530             | LTSMSEYACPVIEK           |
| >2452 | >MMa20191             | YGNACWCIDLDPKVPIR        |
| >2453 | >comp7_c0_seq4_4      | DAYIAKPENC VYHCATNEGCNK  |
| >2454 | >comp20_c0_seq1_3     | TIIQTAVHKL GK            |
| >2455 | >comp20_c0_seq1_3     | YAVPEGTLR                |
| >2456 | >comp16_c0_seq1_5     | LHGVTYGYCYN SR           |
| >2457 | >comp16_c0_seq1_5     | YYCTILGENEYCR            |
| >2458 | >comp105006_c0_seq1_4 | LATVISPR                 |
| >2459 | >comp404_c0_seq1_2    | TCESFIYGGVGGNK           |
| >2460 | >comp404_c0_seq1_2    | TCESFIYGGVGGNKNNFLNIENCK |
| >2461 | >MMa34629             | DGYIADDDKNCA YFCGR       |
| >2462 | >MMa13619             | DAYIAKPENC VYHCATNEGCNK  |
| >2463 | >MMa13619             | LCTDNGAESGYCQWGGR        |

---

|       |                       |                           |
|-------|-----------------------|---------------------------|
| >2464 | >MMa13619             | LCTDNGAESGYCQWGGR         |
| >2465 | >MMa17865             | KSELWNYNTNK               |
| >2466 | >MMa17865             | VWCVINNESCNSECK           |
| >2467 | >MMa17864             | IWCVINNESCNSECK           |
| >2468 | >MMa17864             | IWCVINNESCNSECKLR         |
| >2469 | >MMa17864             | LACYCEGAPKSELWAYETNK      |
| >2470 | >MMa17864             | SELWAYETNK                |
| >2471 | >MMa55372             | AESGYCQWASK               |
| >2472 | >MMa55372             | DGYIADDRNCOPYFCGR         |
| >2473 | >MMa55372             | NRAESGYCQWASK             |
| >2474 | >MMa55372             | YGNACWCYK                 |
| >2475 | >MMa55372             | YGNACWCYKLPDDAR           |
| >2476 | >MMa04555             | VAECLFNNYCNNECTK          |
| >2477 | >MMa35530             | LTSMSEYACPVIEK            |
| >2478 | >MMa35530             | LTSMSEYACPVIEKWCEDHCAAK   |
| >2479 | >MMa20191             | YGNACWCIDLDPKVPIR         |
| >2480 | >comp105006_c0_seq1_4 | LATVISPR                  |
| >2481 | >comp404_c0_seq1_2    | DCSLPVDTGR                |
| >2482 | >comp404_c0_seq1_2    | NNFLNIENCCK               |
| >2483 | >comp404_c0_seq1_2    | NSKTCEFSIYGGVGGNK         |
| >2484 | >comp404_c0_seq1_2    | TCESFIYGGVGGNK            |
| >2485 | >comp404_c0_seq1_2    | TCESFIYGGVGGNKNNFLNIENCCK |
| >2486 | >MMa34629             | DGYIADDDKNCAIFYCGR        |
| >2487 | >MMa34629             | LPDKVPIR                  |
| >2488 | >comp34_c2_seq1_2     | LACWCDDIHNWVPTWSR         |
| >2489 | >MMa02192             | VSCLWGNEGCNK              |
| >2490 | >MMa02192             | VSCLWGNEGCNKECR           |
| >2491 | >MMa17865             | GGYYGYCYFWK               |
| >2492 | >MMa17865             | KSELWNYNTNK               |
| >2493 | >MMa17865             | LACFCQGAR                 |
| >2494 | >MMa17865             | SELWNYNTNK                |
| >2495 | >MMa17865             | VWCVINNESCNSECK           |
| >2496 | >comp38_c0_seq1_5     | VSECLLNNYCNNECTK          |
| >2497 | >MMa55372             | AESGYCQWASK               |
| >2498 | >MMa55372             | DGYIADDRNCOPYFCGR         |
| >2499 | >MMa55372             | NRAESGYCQWASK             |
| >2500 | >MMa55372             | YGNACWCYK                 |
| >2501 | >MMa55372             | YGNACWCYKLPDDAR           |
| >2502 | >MMa17864             | IWCVINNESCNSECK           |
| >2503 | >MMa35530             | HSWNKLTSMSEYACPVIEK       |
| >2504 | >MMa35530             | LTSMSEYACPVIEK            |
| >2505 | >MMa35530             | LTSMSEYACPVIEKWCEDHCAAK   |

---

|       |                       |                           |
|-------|-----------------------|---------------------------|
| >2506 | >MMa20191             | YGNACWCIDLDPDKVPIR        |
| >2507 | >comp105006_c0_seq1_4 | LATVISPR                  |
| >2508 | >comp404_c0_seq1_2    | NNFLNIENCCK               |
| >2509 | >comp404_c0_seq1_2    | TCESFIYGGVGGNK            |
| >2510 | >comp404_c0_seq1_2    | TCESFIYGGVGGNKNNFLNIENCCK |
| >2511 | >MMa34629             | DGYIADDDKNCAYFCGR         |
| >2512 | >comp34_c2_seq1_2     | LACWCDDIHNWVPTWSR         |
| >2513 | >MMa13619             | LCTDNGAESGYCQWGGR         |
| >2514 | >MMa02192             | VSCLWGNEGCNK              |
| >2515 | >MMa02192             | VSCLWGNEGCNKECR           |
| >2516 | >comp7_c0_seq4_4      | DAYIAKPENCVYHCATNEGCNK    |
| >2517 | >comp7_c0_seq4_4      | YGNACWCIK                 |
| >2518 | >comp404_c0_seq1_2    | NNFLNIENCCK               |
| >2519 | >comp404_c0_seq1_2    | TCESFIYGGVGGNK            |
| >2520 | >comp404_c0_seq1_2    | TCESFIYGGVGGNKNNFLNIENCCK |
| >2521 | >MMa55372             | AESGYCQWASK               |
| >2522 | >MMa55372             | DGYIADDRNCPYFCGR          |
| >2523 | >MMa55372             | NRAESGYCQWASK             |
| >2524 | >MMa55372             | YGNACWCYKLPDDAR           |
| >2525 | >MMa02192             | VSCLWGNEGCNKECR           |
| >2526 | >comp20_c0_seq1_3     | THQTAVHKLK                |
| >2527 | >comp20_c0_seq1_3     | YAVPEGTLR                 |
| >2528 | >MMa20191             | YGNACWCIDLDPDKVPIR        |
| >2529 | >MMa17865             | GGYYGYCYFWK               |
| >2530 | >MMa17865             | IRGGYYGYCYFWK             |
| >2531 | >MMa17865             | KSELWNYNTNK               |
| >2532 | >MMa17865             | LACFCQGAR                 |
| >2533 | >MMa17865             | SELWNYNTNK                |
| >2534 | >MMa17865             | VWCVINNESCNSECK           |
| >2535 | >MMa17865             | VWCVINNESCNSECKIR         |
| >2536 | >MMa17865             | YTGCKVWCVINNESCNSECK      |
| >2537 | >MMa17864             | GNYGICYFWK                |
| >2538 | >MMa17864             | IWCVINNESCNSECK           |
| >2539 | >MMa17864             | IWCVINNESCNSECKLR         |
| >2540 | >MMa17864             | LACYCEGAPK                |
| >2541 | >MMa17864             | LACYCEGAPKSELWAYETNK      |
| >2542 | >MMa17864             | SELWAYETNK                |
| >2543 | >MMa17864             | SELWAYETNKCNGR            |
| >2544 | >MMa17864             | YTGCKIWCVINNESCNSECK      |
| >2545 | >MMa34629             | DGYIADDDKNCAYFCGR         |
| >2546 | >MMa34629             | LPDKVPIR                  |
| >2547 | >MMa13616             | YGNACWCIK                 |

---

|       |                       |                         |
|-------|-----------------------|-------------------------|
| >2548 | >comp34_c2_seq1_2     | LACWCDDIHNWVPTWSR       |
| >2549 | >MMa35530             | LTSMSEYACPVIEK          |
| >2550 | >MMa35530             | LTSMSEYACPVIEKWCEDHCAAK |
| >2551 | >MMa13619             | DAYIAKPENCYVYHCATNEGCNK |
| >2552 | >MMa13619             | LCTDNGAESGYCQWGGR       |
| >2553 | >MMa13619             | YGNACWCIK               |
| >2554 | >MMa13619             | YGNACWCIKLPDR           |
| >2555 | >MMa17865             | KSELWNYNTNK             |
| >2556 | >MMa17865             | LACFCQGARK              |
| >2557 | >MMa17865             | SELWNYNTNK              |
| >2558 | >MMa17865             | VWCVINNESCNSECK         |
| >2559 | >MMa17865             | VWCVINNESCNSECKIR       |
| >2560 | >MMa17864             | GNYGYCYFWKLACYCEGAPK    |
| >2561 | >MMa17864             | IWCVINNESCNSECKLR       |
| >2562 | >MMa17864             | SELWAYETNKCNGR          |
| >2563 | >MMa55372             | AESGYCQWASK             |
| >2564 | >MMa55372             | NRAESGYCQWASK           |
| >2565 | >MMa55372             | YGNACWCYK               |
| >2566 | >MMa55372             | YGNACWCYKLPDDAR         |
| >2567 | >comp7_c0_seq4_4      | DAYIAKPENCYVYHCATNEGCNK |
| >2568 | >comp38_c0_seq1_5     | VSECLLNNYCNNICK         |
| >2569 | >MMa35530             | LTSMSEYACPVIEK          |
| >2570 | >MMa20191             | YGNACWCIDLDPKVPIR       |
| >2571 | >comp20_c0_seq1_3     | KEEGFCHGFK              |
| >2572 | >comp20_c0_seq1_3     | TIIQTAVHK               |
| >2573 | >comp20_c0_seq1_3     | YAVPEGTLR               |
| >2574 | >comp162_c0_seq1_6    | IKCSILGTNNK             |
| >2575 | >comp105006_c0_seq1_4 | LATVISPR                |
| >2576 | >comp404_c0_seq1_2    | DCSLPVDTGR              |
| >2577 | >MMa34629             | DGYIADDDKNCA YFCGR      |
| >2578 | >MMa34629             | LPDKVPIR                |
| >2579 | >MMa34629             | NGAESGYCQWAGVYGNACWCYK  |
| >2580 | >comp34_c2_seq1_2     | LACWCDDIHNWVPTWSR       |
| >2581 | >MMa13619             | DAYIAKPENCYVYHCATNEGCNK |
| >2582 | >MMa13619             | LCTDNGAESGYCQWGGR       |
| >2583 | >MMa13619             | YGNACWCIKLPDR           |
| >2584 | >MMa02192             | VSCLWGNEGCNK            |
| >2585 | >MMa02192             | VSCLWGNEGCNKECR         |
| >2586 | >MMa13616             | YGNACWCIK               |
| >2587 | >MMa17865             | KSELWNYNTNK             |
| >2588 | >MMa17865             | SELWNYNTNK              |
| >2589 | >MMa17865             | VWCVINNESCNSECK         |

---

|       |                       |                         |
|-------|-----------------------|-------------------------|
| >2590 | >MMa17864             | GNYGICYFWK              |
| >2591 | >MMa17864             | IWCVINNESCNSECK         |
| >2592 | >MMa17864             | IWCVINNESCNSECKLR       |
| >2593 | >MMa17864             | SELWAYETNKCNGR          |
| >2594 | >MMa55372             | AESGYCQWASK             |
| >2595 | >MMa55372             | DGYIADDRNCPYFCGR        |
| >2596 | >MMa55372             | NRAESGYCQWASK           |
| >2597 | >MMa55372             | YGNACWCYK               |
| >2598 | >MMa55372             | YGNACWCYKLPDDAR         |
| >2599 | >comp7_c0_seq4_4      | DAYIAKPENCVYHCATNEGCNK  |
| >2600 | >comp7_c0_seq4_4      | LCTDNGAESGYCQWGGK       |
| >2601 | >comp7_c0_seq4_4      | YGNACWCIK               |
| >2602 | >comp38_c0_seq1_5     | VSECLLNNYCNNICTK        |
| >2603 | >MMa35530             | LTSMSEYACPVIEK          |
| >2604 | >MMa35530             | LTSMSEYACPVIEKWCEDHCAAK |
| >2605 | >comp10876_c0_seq1_2  | LSSPASIDKK              |
| >2606 | >comp141_c0_seq1_4    | GFLLGFCDQR              |
| >2607 | >comp141_c0_seq1_4    | KGFLLGFCDQR             |
| >2608 | >MMa20191             | YGNACWCIDLDPDK          |
| >2609 | >MMa20191             | YGNACWCIDLDPDKVPIR      |
| >2610 | >comp20_c0_seq1_3     | YAVPEGTLR               |
| >2611 | >comp7_c0_seq8_6      | CITIEGCNNFCTK           |
| >2612 | >comp105006_c0_seq1_4 | LATVISPR                |
| >2613 | >MMa12627             | DLPDNVPIRVPGK           |
| >2614 | >comp54_c0_seq1_5     | GTCHDFNDIGCK            |
| >2615 | >comp404_c0_seq1_2    | TCESFIYGGVGGNK          |
| >2616 | >MMa34629             | LPDKVPIR                |
| >2617 | >comp34_c2_seq1_2     | LACWCDDIHNWVPTWSR       |
| >2618 | >MMa13619             | DAYIAKPENCVYHCATNEGCNK  |
| >2619 | >MMa13619             | LCTDNGAESGYCQWGGR       |
| >2620 | >MMa13619             | YGNACWCIK               |
| >2621 | >MMa02192             | VSCLWGNEGCNK            |
| >2622 | >MMa02192             | VSCLWGNEGCNKECR         |
| >2623 | >MMa13616             | LCTENGAESGYCQWGGK       |
| >2624 | >MMa13616             | LPDSVPIR                |
| >2625 | >MMa13616             | LPDSVPIRVPGK            |
| >2626 | >MMa13619             | LCTDNGAESGYCQWGGR       |
| >2627 | >comp7_c0_seq2_6      | YGNACWCIELPDNVPIRVPGK   |
| >2628 | >MMa17865             | KSELWNYNTNK             |
| >2629 | >MMa17865             | LACFCQGAR               |
| >2630 | >MMa17865             | SELWNYNTNK              |
| >2631 | >MMa17865             | VWCVINNESCNSECKIR       |

---

|       |                       |                            |
|-------|-----------------------|----------------------------|
| >2632 | >MMa17864             | IWCVINNESCENSECK           |
| >2633 | >MMa17864             | IWCVINNESCENSECKLR         |
| >2634 | >MMa17864             | SELWAYETNKCNGR             |
| >2635 | >MMa55372             | AESGYCQWASK                |
| >2636 | >MMa55372             | DGYIADDRNCPYFCGR           |
| >2637 | >MMa55372             | YGNACWCYK                  |
| >2638 | >MMa55372             | YGNACWCYKLPDDAR            |
| >2639 | >comp23761_c0_seq3_4  | LPSDVQVGSMTK               |
| >2640 | >comp7_c0_seq4_4      | LCTDNGAESGYCQWGGK          |
| >2641 | >comp7_c0_seq5_6      | DAYIAKPHNCVYECAR           |
| >2642 | >comp7_c0_seq5_6      | NEYCNDLCTK                 |
| >2643 | >comp38_c0_seq1_5     | VSECLLNNYCNNICTK           |
| >2644 | >MMa35530             | HSWNKLTSMSEYACPVIEK        |
| >2645 | >MMa35530             | LTSMSYACPVIEK              |
| >2646 | >MMa35530             | LTSMSYACPVIEKWCEDHCAAK     |
| >2647 | >comp141_c0_seq1_4    | GFLLGFCQDR                 |
| >2648 | >comp141_c0_seq1_4    | KGFLLGFCQDR                |
| >2649 | >MMa20191             | YGNACWCIDLDPKVPIR          |
| >2650 | >comp24810_c0_seq1_2  | CFCKSVQR                   |
| >2651 | >comp20_c0_seq1_3     | TQFGCPAYQGYCDDHCQDIK       |
| >2652 | >comp20_c0_seq1_3     | YAVPEGTLR                  |
| >2653 | >comp7_c0_seq8_6      | CITIEGCNNFCTK              |
| >2654 | >comp16_c0_seq1_5     | LHGVTYGYCYNRSR             |
| >2655 | >comp34_c2_seq1_2     | LACWCDDIHNWVPTWSR          |
| >2656 | >comp34_c2_seq1_2     | NWCVLNHSCGILCEGYGGSGYCYFWK |
| >2657 | >comp105006_c0_seq1_4 | LATVISPR                   |
| >2658 | >MMa12627             | DLPDNVPIRVPGK              |
| >2659 | >comp404_c0_seq1_2    | TCESFIYGGVGGNK             |
| >2660 | >MMa34629             | DGYIADDKNCAVFCGR           |
| >2661 | >MMa34629             | LPDKVPIR                   |
| >2662 | >MMa34629             | NGAESGYCQWAGVYGNACWCYK     |
| >2663 | >comp199_c0_seq1_5    | ELCLLPKH                   |
| >2664 | >MMa02192             | VSCLWGNEGCKN               |
| >2665 | >MMa02192             | VSCLWGNEGCKNKECR           |
| >2666 | >MMa17864             | IWCVINNESCENSECK           |
| >2667 | >comp7_c0_seq4_4      | DAYIAKPENCVYHNCATNEGCKN    |
| >2668 | >comp7_c0_seq4_4      | LCTDNGAESGYCQWGGK          |
| >2669 | >comp38_c0_seq1_5     | VSECLLNNYCNNICTK           |
| >2670 | >MMa20191             | YGNACWCIDLDPK              |
| >2671 | >MMa20191             | YGNACWCIDLDPKVPIR          |
| >2672 | >comp105006_c0_seq1_4 | LATVISPR                   |
| >2673 | >MMa34629             | LPDKVPIR                   |



---

|       |                       |                         |
|-------|-----------------------|-------------------------|
| >2674 | >comp34_c2_seq1_2     | LACWCDDIHNWVPTWSR       |
| >2675 | >MMa13619             | DAYIAKPENCYVYHCATNEGCNK |
| >2676 | >MMa13619             | LCTDNGAESGYCQWGGR       |
| >2677 | >MMa02192             | VSCLWGNEGCNK            |
| >2678 | >MMa02192             | VSCLWGNEGCNKECR         |
| >2679 | >comp24134_c0_seq1_2  | LASILSPR                |
| >2680 | >comp7_c0_seq4_4      | LCTDNGAESGYCQWGGR       |
| >2681 | >MMa55372             | YGNACWCYKLPDDAR         |
| >2682 | >MMa02192             | VSCLWGNEGCNKECR         |
| >2683 | >MMa20191             | YGNACWCIDLDPKVPIR       |
| >2684 | >MMa17864             | IWCVINNESECK            |
| >2685 | >MMa17864             | SELWAYETNK              |
| >2686 | >comp112_c0_seq1_5    | TITLEVEPSDTIENVK        |
| >2687 | >comp7_c0_seq2_6      | YGNACWCIELPDNVPIRVPKG   |
| >2688 | >MMa34629             | LPDKVPIR                |
| >2689 | >comp141_c0_seq1_4    | GFLLGFCDQR              |
| >2690 | >comp34_c2_seq1_2     | LACWCDDIHNWVPTWSR       |
| >2691 | >MMa13619             | LCTDNGAESGYCQWGGR       |
| >2692 | >comp38_c0_seq1_5     | VSECLLNNYCNNICTK        |
| >2693 | >MMa04118             | CFASSECWACK             |
| >2694 | >comp7_c0_seq5_6      | DAYIAKPHNCVYECAR        |
| >2695 | >comp7_c0_seq5_6      | NEYCNDLCTK              |
| >2696 | >comp191_c0_seq1_3    | CVIEAEGSLIYHLCK         |
| >2697 | >comp191_c0_seq1_3    | TATFCTQSICQESCK         |
| >2698 | >MMa20191             | YGNACWCIDLDPK           |
| >2699 | >MMa20191             | YGNACWCIDLDPKVPIR       |
| >2700 | >comp7_c0_seq8_6      | CITIEGCNNFCTK           |
| >2701 | >MMa12627             | DLPDNVPIRVPKG           |
| >2702 | >comp105006_c0_seq1_4 | LATVISPR                |
| >2703 | >comp74_c0_seq1_1     | DAYIAQNYNCVYHCAR        |
| >2704 | >comp7_c0_seq2_6      | YGNACWCIELPDNVPIR       |
| >2705 | >comp7_c0_seq8_6      | CITIEGCNNFCTK           |
| >2706 | >MMa20191             | YGNACWCIDLDPKVPIR       |
| >2707 | >comp38_c0_seq1_5     | VSECLLNNYCNNICTK        |
| >2708 | >MMa17865             | VWCVINNESECK            |
| >2709 | >comp191_c0_seq1_3    | CVIEAEGSLIYHLCK         |
| >2710 | >comp191_c0_seq1_3    | TATFCTQSICQESCK         |
| >2711 | >comp105006_c0_seq1_4 | LATVISPR                |
| >2712 | >comp7_c0_seq5_6      | DAYIAKPHNCVYECAR        |
| >2713 | >MMa04118             | CFASSECWACK             |
| >2714 | >MMa04118             | CFASSECWACKK            |
| >2715 | >comp34_c2_seq1_2     | LACWCDDIHNWVPTWSR       |

---

|       |                       |                   |
|-------|-----------------------|-------------------|
| >2716 | >MMa35530             | LTSMSEYACPVIEK    |
| >2717 | >comp74_c0_seq1_1     | DAYCNELCTK        |
| >2718 | >MMa12627             | DAYCNELCTK        |
| >2719 | >MMa12627             | DLPDNVPIR         |
| >2720 | >MMa12627             | DLPDNVPIRVPGK     |
| >2721 | >MMa12627             | FACYCKDLPDNVPIR   |
| >2722 | >MMa20191             | YGNACWCIDLPDKVPIR |
| >2723 | >comp38_c0_seq1_5     | VSECLLNNYCNNICTK  |
| >2724 | >MMa17864             | IWCVINNESCNSECK   |
| >2725 | >comp191_c0_seq1_3    | CVIEAEGSLIYHLCK   |
| >2726 | >comp105006_c0_seq1_4 | LATVISPR          |
| >2727 | >comp7_c0_seq2_6      | YGNACWCIELPDNVPIR |
| >2728 | >comp7_c0_seq5_6      | DAYIAKPHNCVYECAR  |
| >2729 | >comp7_c0_seq5_6      | IGYCNIQ GK        |
| >2730 | >MMa04118             | CFASSESECWTACK    |
| >2731 | >MMa04118             | CFASSESECWTACKK   |
| >2732 | >comp74_c0_seq1_1     | DAYIAQNYNCVYH CAR |
| >2733 | >MMa12627             | FACYCKDLPDNVPIR   |
| >2734 | >MMa20191             | YGNACWCIDLPDK     |
| >2735 | >MMa20191             | YGNACWCIDLPDKVPIR |
| >2736 | >comp7_c0_seq2_6      | YGNACWCIELPDNVPIR |
| >2737 | >comp38_c0_seq1_5     | VSECLLNNYCNNICTK  |
| >2738 | >comp191_c0_seq1_3    | CVIEAEGSLIYHLCK   |
| >2739 | >comp105006_c0_seq1_4 | LATVISPR          |
| >2740 | >comp7_c0_seq5_6      | DAYIAKPHNCVYECAR  |
| >2741 | >comp7_c0_seq5_6      | IGYCNIQ GK        |
| >2742 | >comp105006_c0_seq1_4 | LATVISPR          |
| >2743 | >MMa12627             | DLPDNVPIR         |
| >2744 | >comp7_c0_seq2_6      | YGNACWCIELPDNVPIR |
| >2745 | >comp34_c1_seq4_6     | YGNACWCINLPDDKPIR |
| >2746 | >comp38_c0_seq1_5     | VSECLLNNYCNNICTK  |
| >2747 | >MMa04118             | CFASSESECWTACK    |
| >2748 | >MMa00982             | CFGPQCLCNR        |
| >2749 | >comp191_c0_seq1_3    | CVIEAEGSLIYHLCK   |
| >2750 | >comp74_c0_seq1_1     | DAYCNELCTK        |
| >2751 | >comp16672_c0_seq10_5 | TLLDLKDKK         |
| >2752 | >MMa12627             | DAYCNELCTK        |
| >2753 | >comp105006_c0_seq1_4 | LATVISPR          |
| >2754 | >comp105006_c0_seq1_4 | LATVISPR          |
| >2755 | >comp105006_c0_seq1_4 | LATVISPR          |
| >2756 | >MMa04118             | CFASSESECWTACK    |
| >2757 | >MMa04118             | CFASSESECWTACKK   |

---

|       |                       |                    |
|-------|-----------------------|--------------------|
| >2758 | >comp105006_c0_seq1_4 | LATVISPR           |
| >2759 | >comp16672_c0_seq10_5 | TLLDLKDKK          |
| >2760 | >comp105006_c0_seq1_4 | LATVISPR           |
| >2761 | >comp12098_c0_seq1_6  | NIEVTIDDK          |
| >2762 | >comp105006_c0_seq1_4 | LATVISPR           |
| >2763 | >comp105006_c0_seq1_4 | LATVISPR           |
| >2764 | >comp141042_c0_seq1_1 | EASPAVDSDR         |
| >2765 | >comp105006_c0_seq1_4 | LATVISPR           |
| >2766 | >comp47462_c0_seq1_4  | LNTVLSPR           |
| >2767 | >MMa01489             | FDPSEAGAGR         |
| >2768 | >MMa01489             | FDPTSEAGAGR        |
| >2769 | >comp105006_c0_seq1_4 | LATVISPR           |
| >2770 | >MMa01489             | FDPTSEAGAGR        |
| >2771 | >MMa01489             | FDPASEAGAGR        |
| >2772 | >comp105006_c0_seq1_4 | LATVISPR           |
| >2773 | >MMa01489             | FDPASAAGAGR        |
| >2774 | >comp12_c2_seq3_1     | DCQQYCLTPDR        |
| >2775 | >MMa00460             | KCPGNPPCR          |
| >2776 | >comp12_c2_seq3_1     | CSYGTCYCK          |
| >2777 | >comp12_c2_seq3_1     | DCQQYCLTPDR        |
| >2778 | >comp105006_c0_seq1_4 | LATVISPR           |
| >2779 | >comp105006_c0_seq1_4 | LATVISPR           |
| >2780 | >comp12_c2_seq3_1     | DCQQYCLTPDR        |
| >2781 | >MMa01489             | FDPTLEAGAGR        |
| >2782 | >MMa01489             | FDPVSAAGAGR        |
| >2783 | >comp105006_c0_seq1_4 | LATVISPR           |
| >2784 | >comp47462_c0_seq1_4  | LNTVLSPR           |
| >2785 | >comp12_c2_seq3_1     | DCQQYCLTPDR        |
| >2786 | >comp150641_c0_seq1_3 | LASPLSIFVYHQMWKGSR |
| >2787 | >MMa00982             | CFGPQCLCNR         |
| >2788 | >comp20_c0_seq1_3     | YAVPEGTLR          |
| >2789 | >comp55_c0_seq1_6     | CQGGSCASVCR        |
| >2790 | >comp105006_c0_seq1_4 | LATVISPR           |
| >2791 | >comp562_c0_seq1_6    | NFDCLKPCR          |
| >2792 | >MMa01489             | FDPTLEAGAGR        |
| >2793 | >MMa04118             | CFASSECWACK        |
| >2794 | >comp392_c0_seq1_3    | CSASYQCFPVCK       |
| >2795 | >comp42_c0_seq1_6     | NDIVEEPFK          |
| >2796 | >comp191_c0_seq1_3    | TATFCTQSICQESCK    |
| >2797 | >MMa01489             | FNPTSEAGAGR        |
| >2798 | >MMa01489             | FNPALEAGAGR        |
| >2799 | >comp55_c0_seq1_6     | CQGGSCASVCR        |

---

|       |                       |                         |
|-------|-----------------------|-------------------------|
| >2800 | >MMa21259             | IDAAACYSSDCR            |
| >2801 | >comp105006_c0_seq1_4 | LATVISPR                |
| >2802 | >comp562_c0_seq1_6    | NFDCLKPCR               |
| >2803 | >comp130124_c0_seq1_5 | LLEMQENMVKL VETIFNR     |
| >2804 | >MMa04118             | CFASSECW TACK           |
| >2805 | >MMa00982             | CFGPQCLCN R             |
| >2806 | >comp7_c0_seq5_6      | NEYCNDLCT K             |
| >2807 | >comp191_c0_seq1_3    | TATFCTQSIC QESCK        |
| >2808 | >MMa01489             | FDPVSAAGAGR             |
| >2809 | >MMa43404             | YVQSTCGPGT VFNEAR       |
| >2810 | >MMa04118             | CFASSECW TACK           |
| >2811 | >MMa00982             | CFGPQCLCN R             |
| >2812 | >comp74_c0_seq1_1     | DAYCNELCT K             |
| >2813 | >MMa12627             | DAYCNELCT K             |
| >2814 | >MMa12627             | DLPDNVPIR               |
| >2815 | >comp7_c0_seq5_6      | NEYCNDLCT K             |
| >2816 | >comp404_c0_seq1_2    | DCSLPVDTGR              |
| >2817 | >comp404_c0_seq1_2    | NNFLNIENCCK             |
| >2818 | >comp404_c0_seq1_2    | TCESFIYGGV GGNK         |
| >2819 | >comp47462_c0_seq1_4  | LNTVLSPR                |
| >2820 | >MMa04118             | CFASSECW TACK           |
| >2821 | >MMa55372             | AESGYCQWASK             |
| >2822 | >MMa55372             | YGNACWCYK               |
| >2823 | >MMa00982             | CFGPQCLCN R             |
| >2824 | >comp9340_c1_seq8_6   | PATGVPIR                |
| >2825 | >comp7_c0_seq5_6      | NEYCNDLCT K             |
| >2826 | >comp74_c0_seq1_1     | DAYCNELCT K             |
| >2827 | >comp17079_c0_seq1_4  | SSFGLLEGR               |
| >2828 | >MMa12627             | DAYCNELCT K             |
| >2829 | >MMa12627             | DLPDNVPIR               |
| >2830 | >comp404_c0_seq1_2    | DCSLPVDTGR              |
| >2831 | >comp404_c0_seq1_2    | NNFLNIENCCK             |
| >2832 | >comp404_c0_seq1_2    | TCESFIYGGV GGNK         |
| >2833 | >MMa13616             | YGNACWCIK               |
| >2834 | >MMa00982             | CFGPQCLCN R             |
| >2835 | >MMa18140             | LPDPVDLR                |
| >2836 | >comp7_c0_seq4_4      | DAYIAKPENC VYHCATNEGCNK |
| >2837 | >comp7_c0_seq4_4      | LCTDNGAESGY CQWGGK      |
| >2838 | >comp7_c0_seq4_4      | YGNACWCIK               |
| >2839 | >MMa20191             | YGNACWCIDL PDK          |
| >2840 | >MMa20191             | YGNACWCIDL PDKVPIR      |
| >2841 | >comp7482_c0_seq2_5   | MNLEVICDQR              |

---

|       |                       |                        |
|-------|-----------------------|------------------------|
| >2842 | >comp7_c0_seq5_6      | NEYCNDLCTK             |
| >2843 | >comp105006_c0_seq1_4 | LATVISPR               |
| >2844 | >MMa34629             | DGYIADDKNCAYFCGR       |
| >2845 | >MMa34629             | LPDKVPIR               |
| >2846 | >comp17568_c0_seq1_6  | IGVLKVLPR              |
| >2847 | >comp14858_c0_seq1_2  | SMQIDIPSR              |
| >2848 | >MMa13619             | DAYIAKPENCVYHCATNEGCNK |
| >2849 | >MMa13619             | LCTDNGAESGYCQWGGR      |
| >2850 | >MMa13619             | YGNACWCIK              |
| >2851 | >MMa13616             | DAYIAKPENCVYECGITQDCNK |
| >2852 | >MMa13616             | LCTENGAESGYCQWGGK      |
| >2853 | >MMa13616             | LPDSVPIR               |
| >2854 | >MMa13619             | LCTDNGAESGYCQWGGR      |
| >2855 | >MMa00982             | CFGPQCLCNR             |
| >2856 | >MMa20191             | YGNACWCIDLDPDK         |
| >2857 | >MMa20191             | YGNACWCIDLDPDKVPIR     |
| >2858 | >comp86_c0_seq1_2     | YCSENPLDCNEHCLK        |
| >2859 | >MMa34629             | LPDKVPIR               |
| >2860 | >comp105006_c0_seq1_4 | LATVISPR               |
| >2861 | >comp11050_c0_seq1_5  | NIPQLVSPR              |
| >2862 | >comp20_c0_seq1_3     | YAVPEGTLR              |
| >2863 | >comp105006_c0_seq1_4 | LATVISPR               |
| >2864 | >comp7_c0_seq5_6      | IGYCNIQGK              |
| >2865 | >MMa02192             | VSCLWGNEGCNK           |
| >2866 | >comp105006_c0_seq1_4 | LATVISPR               |
| >2867 | >comp164574_c0_seq1_2 | KSEYISIR               |
| >2868 | >MMa17865             | KSELWNYNTNK            |
| >2869 | >MMa17865             | LACFCQGAR              |
| >2870 | >MMa17865             | VWCVINNESCNSECK        |
| >2871 | >comp33184_c0_seq4_1  | IMGDIINK               |

---
