# Supplementary material for: Transcriptome Sequencing and Comparison of Venom Glands Revealed Intraspecific Differentiation and Expression Characteristics of Toxin and Defensin Genes in Mesobuthus martensii Populations
Source: MDPI journal article supplement (doi:10.3390/toxins14090630), 2022-09-11
Supplement: s1 [file s1]

# Transcriptome Sequencing and Comparison of Venom Glands Revealed Intraspecific Differentiation and Expression Characteristics of Toxin and Defensin Genes in *Mesobuthus martensii* Populations

Zhiyong Di, Sha Qiao, Xiaoshuang Liu, Shuqing Xiao, Cheng Lei, Yonghao Li, Shaobin Li and Feng Zhang

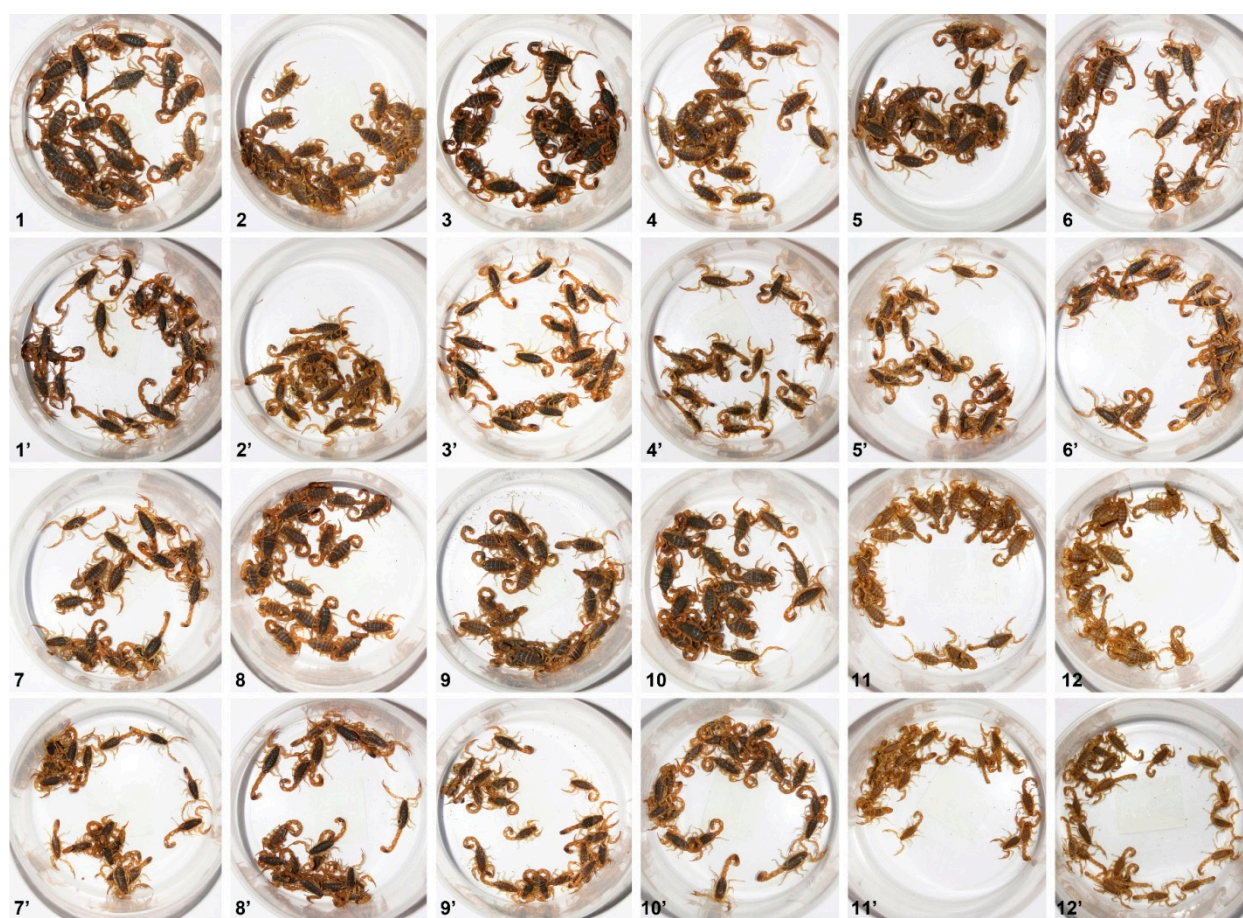

**Figure S1.** The *Mesobuthus martensii* populations and its relatives from sub-wet area, sub-arid area, and arid area. The populations of *M. martensii*: 1 & 1', the females and males from Baoding; 2&2', the females and males from Helan; 3&3' , the females and males from Luoyang; 4&4', the females and males from Lanzhou; 5&5', the females and males from Suide; 6&6', the females and males from Shuozhou; 7&7', the females and males from Tianshui; 8&8', the females and males from Weinan; 9&9', the females and males from Wuzhong; 10&10, the females and males from Yuncheng. The populations of *M. eupeus*: 11&11', the females and males from Yinchuan; 12&12', the females and males from Zhongwei (between Lanzhou and Yinchuan).

**Table S1.** Measurement data of the male *Mesobuthus martensii* (means±SD, \*\*:  $p < 0.001$ , Kruskal-Wallis H test (KW test)) Body length (BL), number of adult individuals (NI), number of pectinal teeth (NP), number of large granules in the lateral sides of movable fingers (NM), number of large granules in the lateral sides of fixed fingers (NF). BD, Baoding; HL, Helan; LY, Luoyang; LZ, Lanzhou; SD, Suide; SZ, Shuozhou; TS, Tianshui; WN, Weinan; WZ, Wuzhong; YC, Yuncheng.

|    | WN       | LY       | BD       | YC       | TS       | SZ       | SD       | LZ       | WZ       | HL          | KW test |
|----|----------|----------|----------|----------|----------|----------|----------|----------|----------|-------------|---------|
| NI | 66       | 48       | 32       | 34       | 56       | 59       | 46       | 44       | 22       | 36          | $p$     |
| BL | 54.200±3 | 55.600±3 | 52.400±4 | 50.100±3 | 50.400±1 | 51.900±3 | 48.500±2 | 48.700±2 | 49.222±2 | 49.500±2.12 | .000 ** |
|    | .615     | .836     | .274     | .035     | .265     | .604     | .014     | .497     | .224     | 1           |         |
| NP | 25.091±1 | 25.375±1 | 23.094±1 | 26.500±1 | 24.268±1 | 22.746±1 | 24.304±1 | 24.909±1 | 24.545±1 | 24.750±1.51 | .000 ** |
|    | .200     | .214     | .376     | .562     | .272     | .169     | .051     | .074     | .224     | 9           |         |
| NM | 13.529±. | 13.727±. | 13.375±. | 13.588±. | 12.873±. | 12.932±. | 13.109±. | 12.933±. | 12.682±. | 12.778±.485 | .000 ** |
|    | 657      | 660      | 492      | 701      | 695      | 487      | 674      | 495      | 568      |             |         |
| NF | 11.328±0 | 11.432±. | 10.871±. | 11.588±0 | 10.745±. | 10.967±. | 10.978±. | 10.609±. | 10.636±. | 10.750±.500 | .000 ** |
|    | .561     | 501      | 500      | 657      | 552      | 367      | 500      | 493      | 492      |             |         |

**Table S2.** Measurement data of the female *Mesobuthus martensii* (means±SD, \*\*:  $p < 0.001$ , Kruskal-Wallis H test (KW test)) Body length (BL), number of adult individuals (NI), number of pectinal teeth (NP), number of large granules in the lateral sides of movable fingers (NM), number of large granules in the lateral sides of fixed fingers (NF). BD, Baoding; HL, Helan; LY, Luoyang; LZ, Lanzhou; SD, Suide; SZ, Shuozhou; TS, Tianshui; WN, Weinan; WZ, Wuzhong; YC, Yuncheng.

|    | WN           | LY           | BD           | YC           | TS           | SZ           | SD           | LZ           | WZ           | HL           | KW test |    |
|----|--------------|--------------|--------------|--------------|--------------|--------------|--------------|--------------|--------------|--------------|---------|----|
| NI | 46           | 47           | 39           | 57           | 35           | 52           | 58           | 61           | 54           | 42           | $p$     |    |
| BL | 60.700±2.058 | 58.700±2.830 | 63.300±3.401 | 59.800±5.138 | 52.200±2.348 | 57.700±3.592 | 55.300±2.263 | 55.600±2.503 | 56.200±2.530 | 54.400±1.633 | .000    | ** |
| NP | 20.674±.871  | 20.213±.977  | 19.410±.966  | 21.246±1.040 | 20.886±1.451 | 18.827±.834  | 20.362±.831  | 20.475±1.074 | 19.981±.900  | 20.167±1.034 | .000    | ** |
| NM | 13.521±.652  | 13.604±.536  | 13.538±.822  | 13.436±.631  | 12.861±.487  | 12.870±.702  | 13.172±.653  | 12.883±.555  | 12.759±.642  | 12.952±.539  | .000    | ** |
| NF | 11.391±.537  | 11.292±.544  | 11.026±.628  | 11.526±.601  | 10.914±.374  | 10.750±.622  | 11.207±.554  | 10.629±.683  | 10.704±.571  | 11.024±.474  | .000    | ** |
